# Supplementary material
Source: publisher figshare collection journal article supplement (https://frontiersin.figshare.com/ndownloader/files/14338055)
Supplement: Supplementary file 1 [file 14338055]

**Supplementary Tables and Figures**

**Table S1. Focal Species list prior to filtering for minimum observation requirements.**

| Species | Observations |
| --- | --- |
| *Paralabrax clathratus* | 993 |
| *Semicossyphus pulcher* | 991 |
| *Kelletia kelletii* | 855 |
| *Megathura crenulata* | 853 |
| *Sebastes atrovirens* | 787 |
| *Mesocentrotus franciscanus* | 759 |
| *Panulirus interruptus* | 756 |
| *Sebastes mystinus* | 619 |
| *Macrocystis pyrifera* | 573 |
| *Sebastes serranoides* | 571 |
| *Sebastes serriceps* | 563 |
| *Haliotis corrugata* | 515 |
| *Haliotis fulgens* | 481 |
| *Haliotis rufescens* | 447 |
| *Sebastes chrysomelas* | 411 |
| *Sebastes carnatus* | 330 |
| *Scorpaenichthys marmoratus* | 318 |
| *Paralabrax nebulifer* | 263 |
| *Sebastes caurinus* | 262 |
| *Ophiodon elongatus* | 237 |
| *Sebastes miniatus* | 180 |
| *Scorpaena guttata* | 163 |
| *Haliotis sorenseni* | 162 |
| *Sebastes paucispinis* | 123 |
| *Sebastes auriculatus* | 112 |
| *Sebastes rastrelliger* | 99 |
| *Sebastes melanops* | 80 |
| *Stereolepis gigas* | 45 |
| *Sebastes dallii* | 35 |
| *Triakis semifasciata* | 13 |
| *Sebastes umbrosus* | 10 |
| *Sebastes pinniger* | 10 |
| *Sebastes hopkinsi* | 10 |
| *Haliotis kamtschatkana assimilis* | 10 |
| *Sebastes semicinctus* | 9 |
| *Sebastes entomelas* | 3 |
| *Sebastes constellatus* | 3 |
| *Sebastes rubrivinctus* | 1 |
| *Sebastes levis* | 1 |


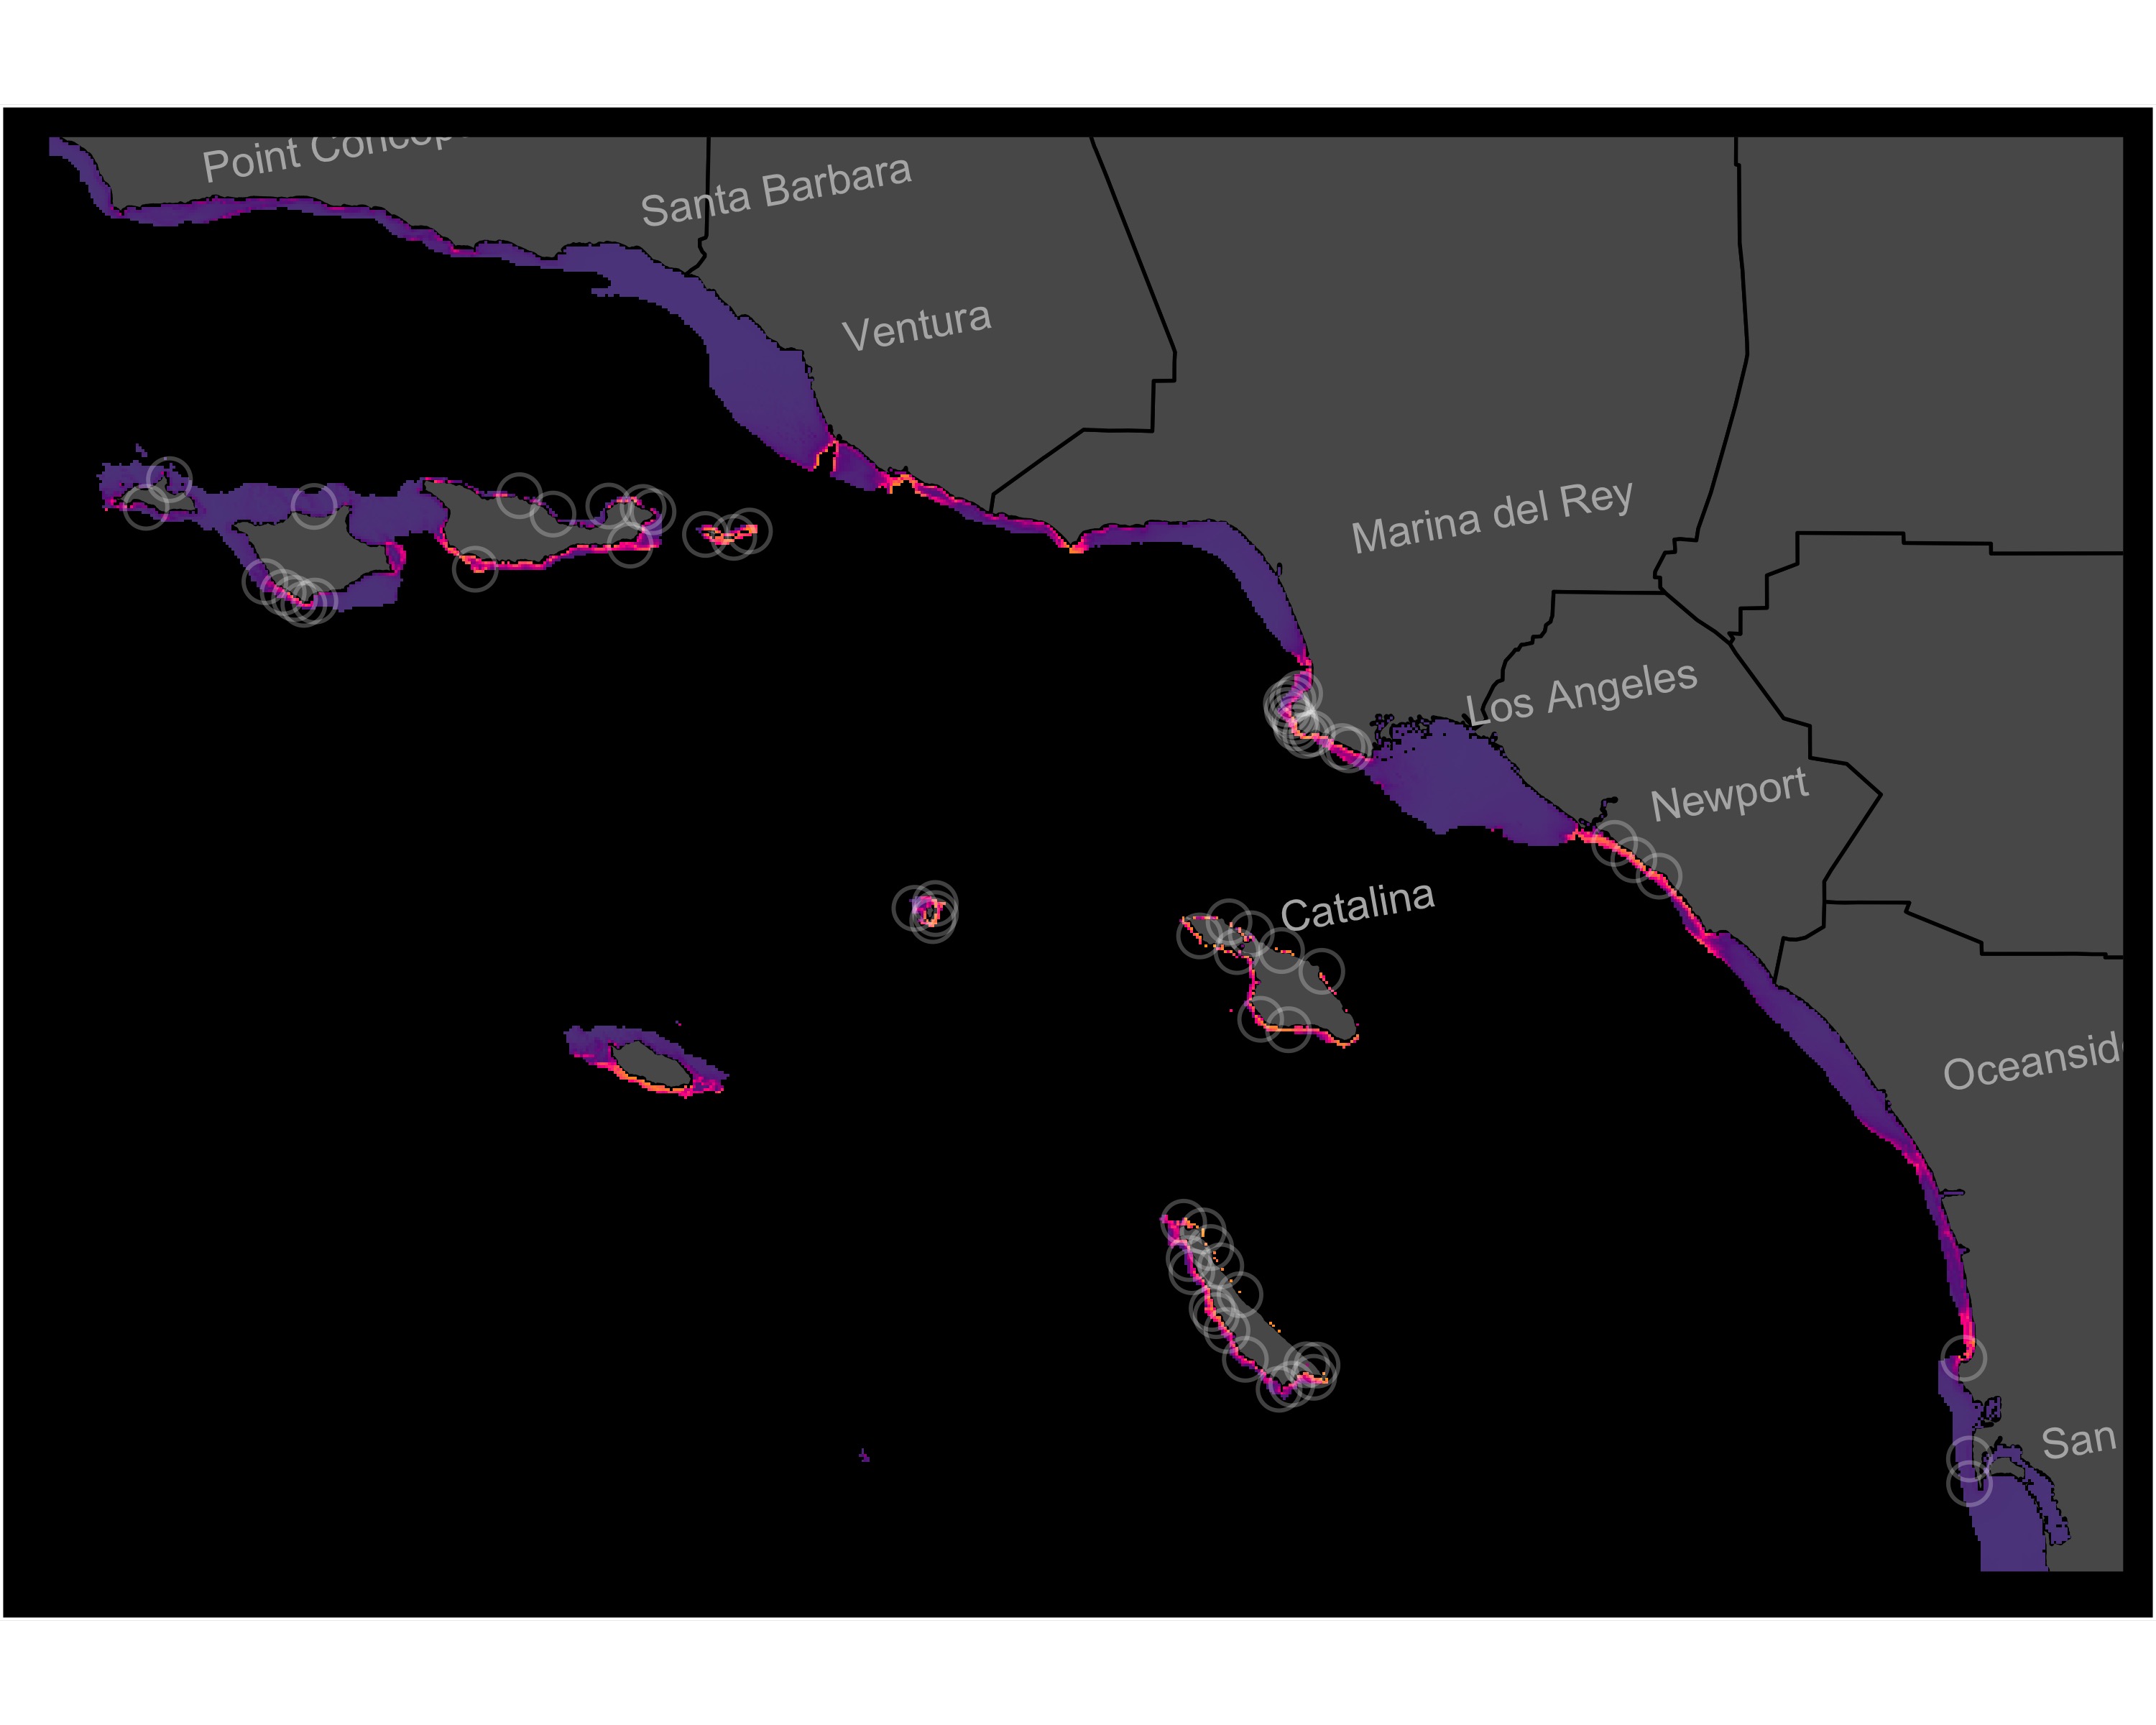


**Figure S1. Individual-SDM for *Haliotis corrugata* in the SCB.** Model shown is the best-fit model (Table 1) of 12 candidate models. White circles show all observations from natural reefs included in the training and test datasets.


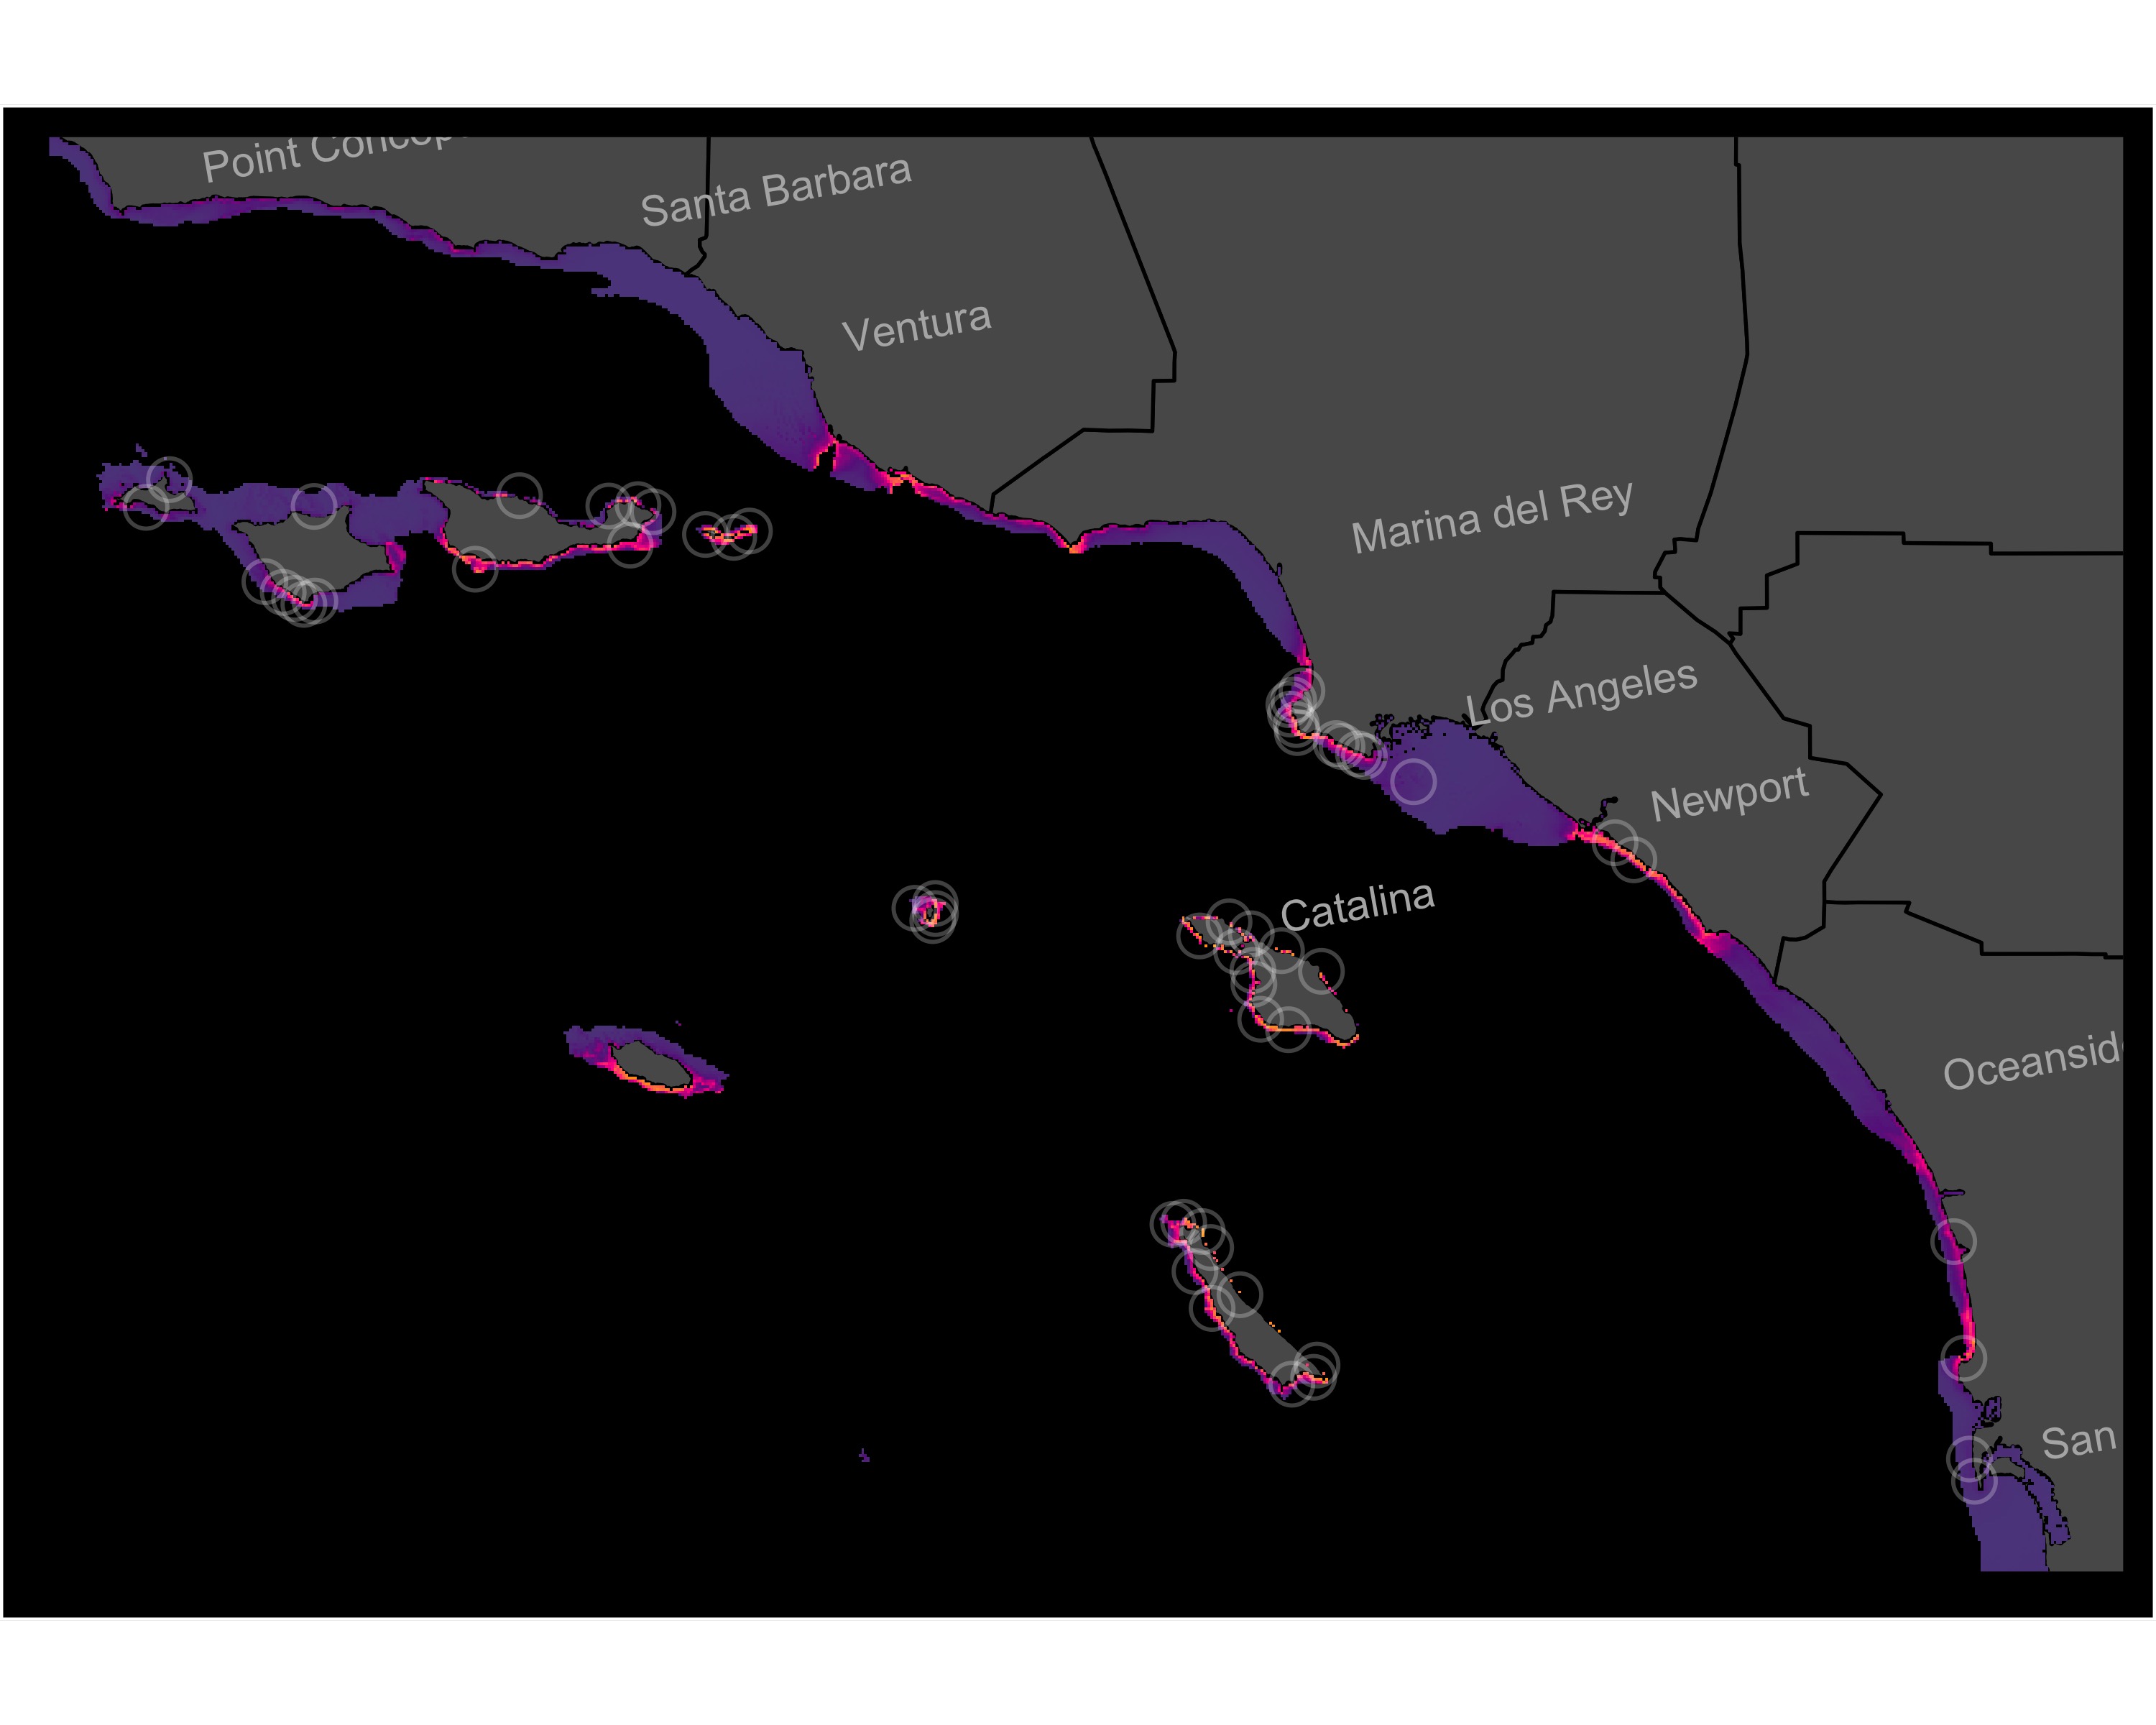


**Figure S2. Individual-SDM for *Haliotis fulgens* in the SCB.** Model shown is the best-fit model (Table 1) of 12 candidate models. White circles show all observations from natural reefs included in the training and test datasets.


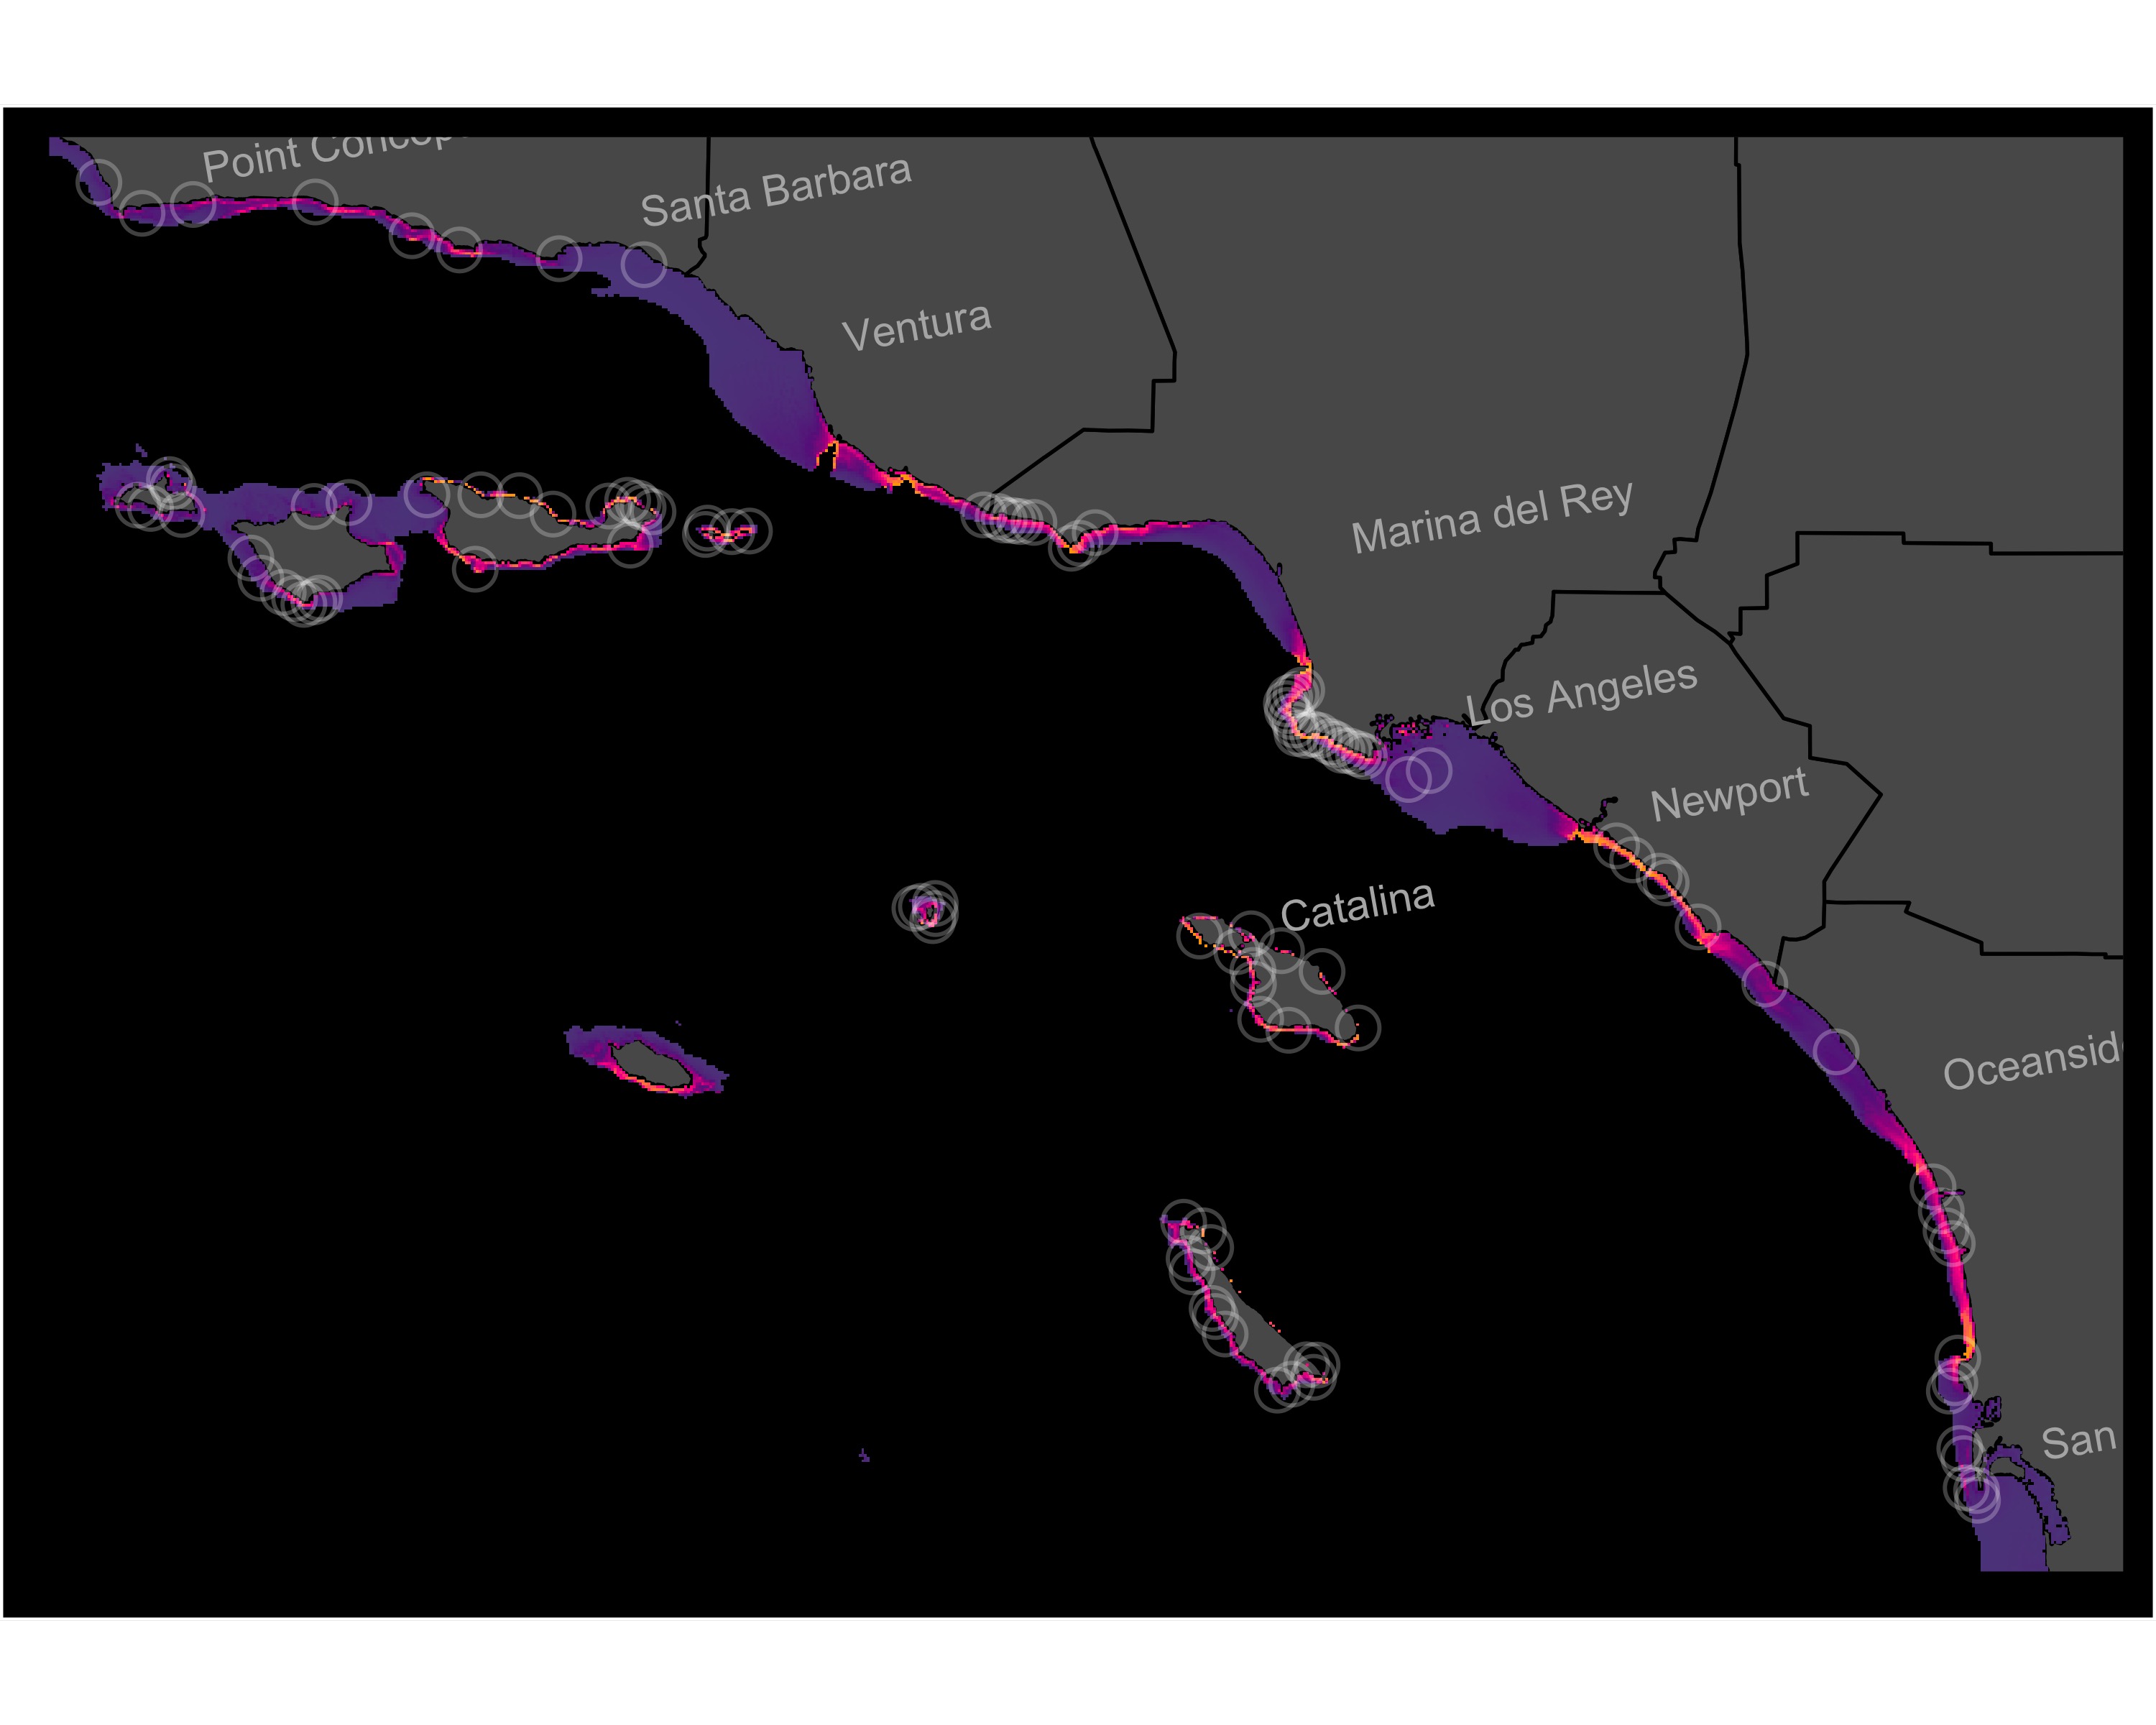


**Figure S3. Individual-SDM for *Kelletia kelletii* in the SCB.** Model shown is the best-fit model (Table 1) of 12 candidate models. White circles show all observations from natural reefs included in the training and test datasets.


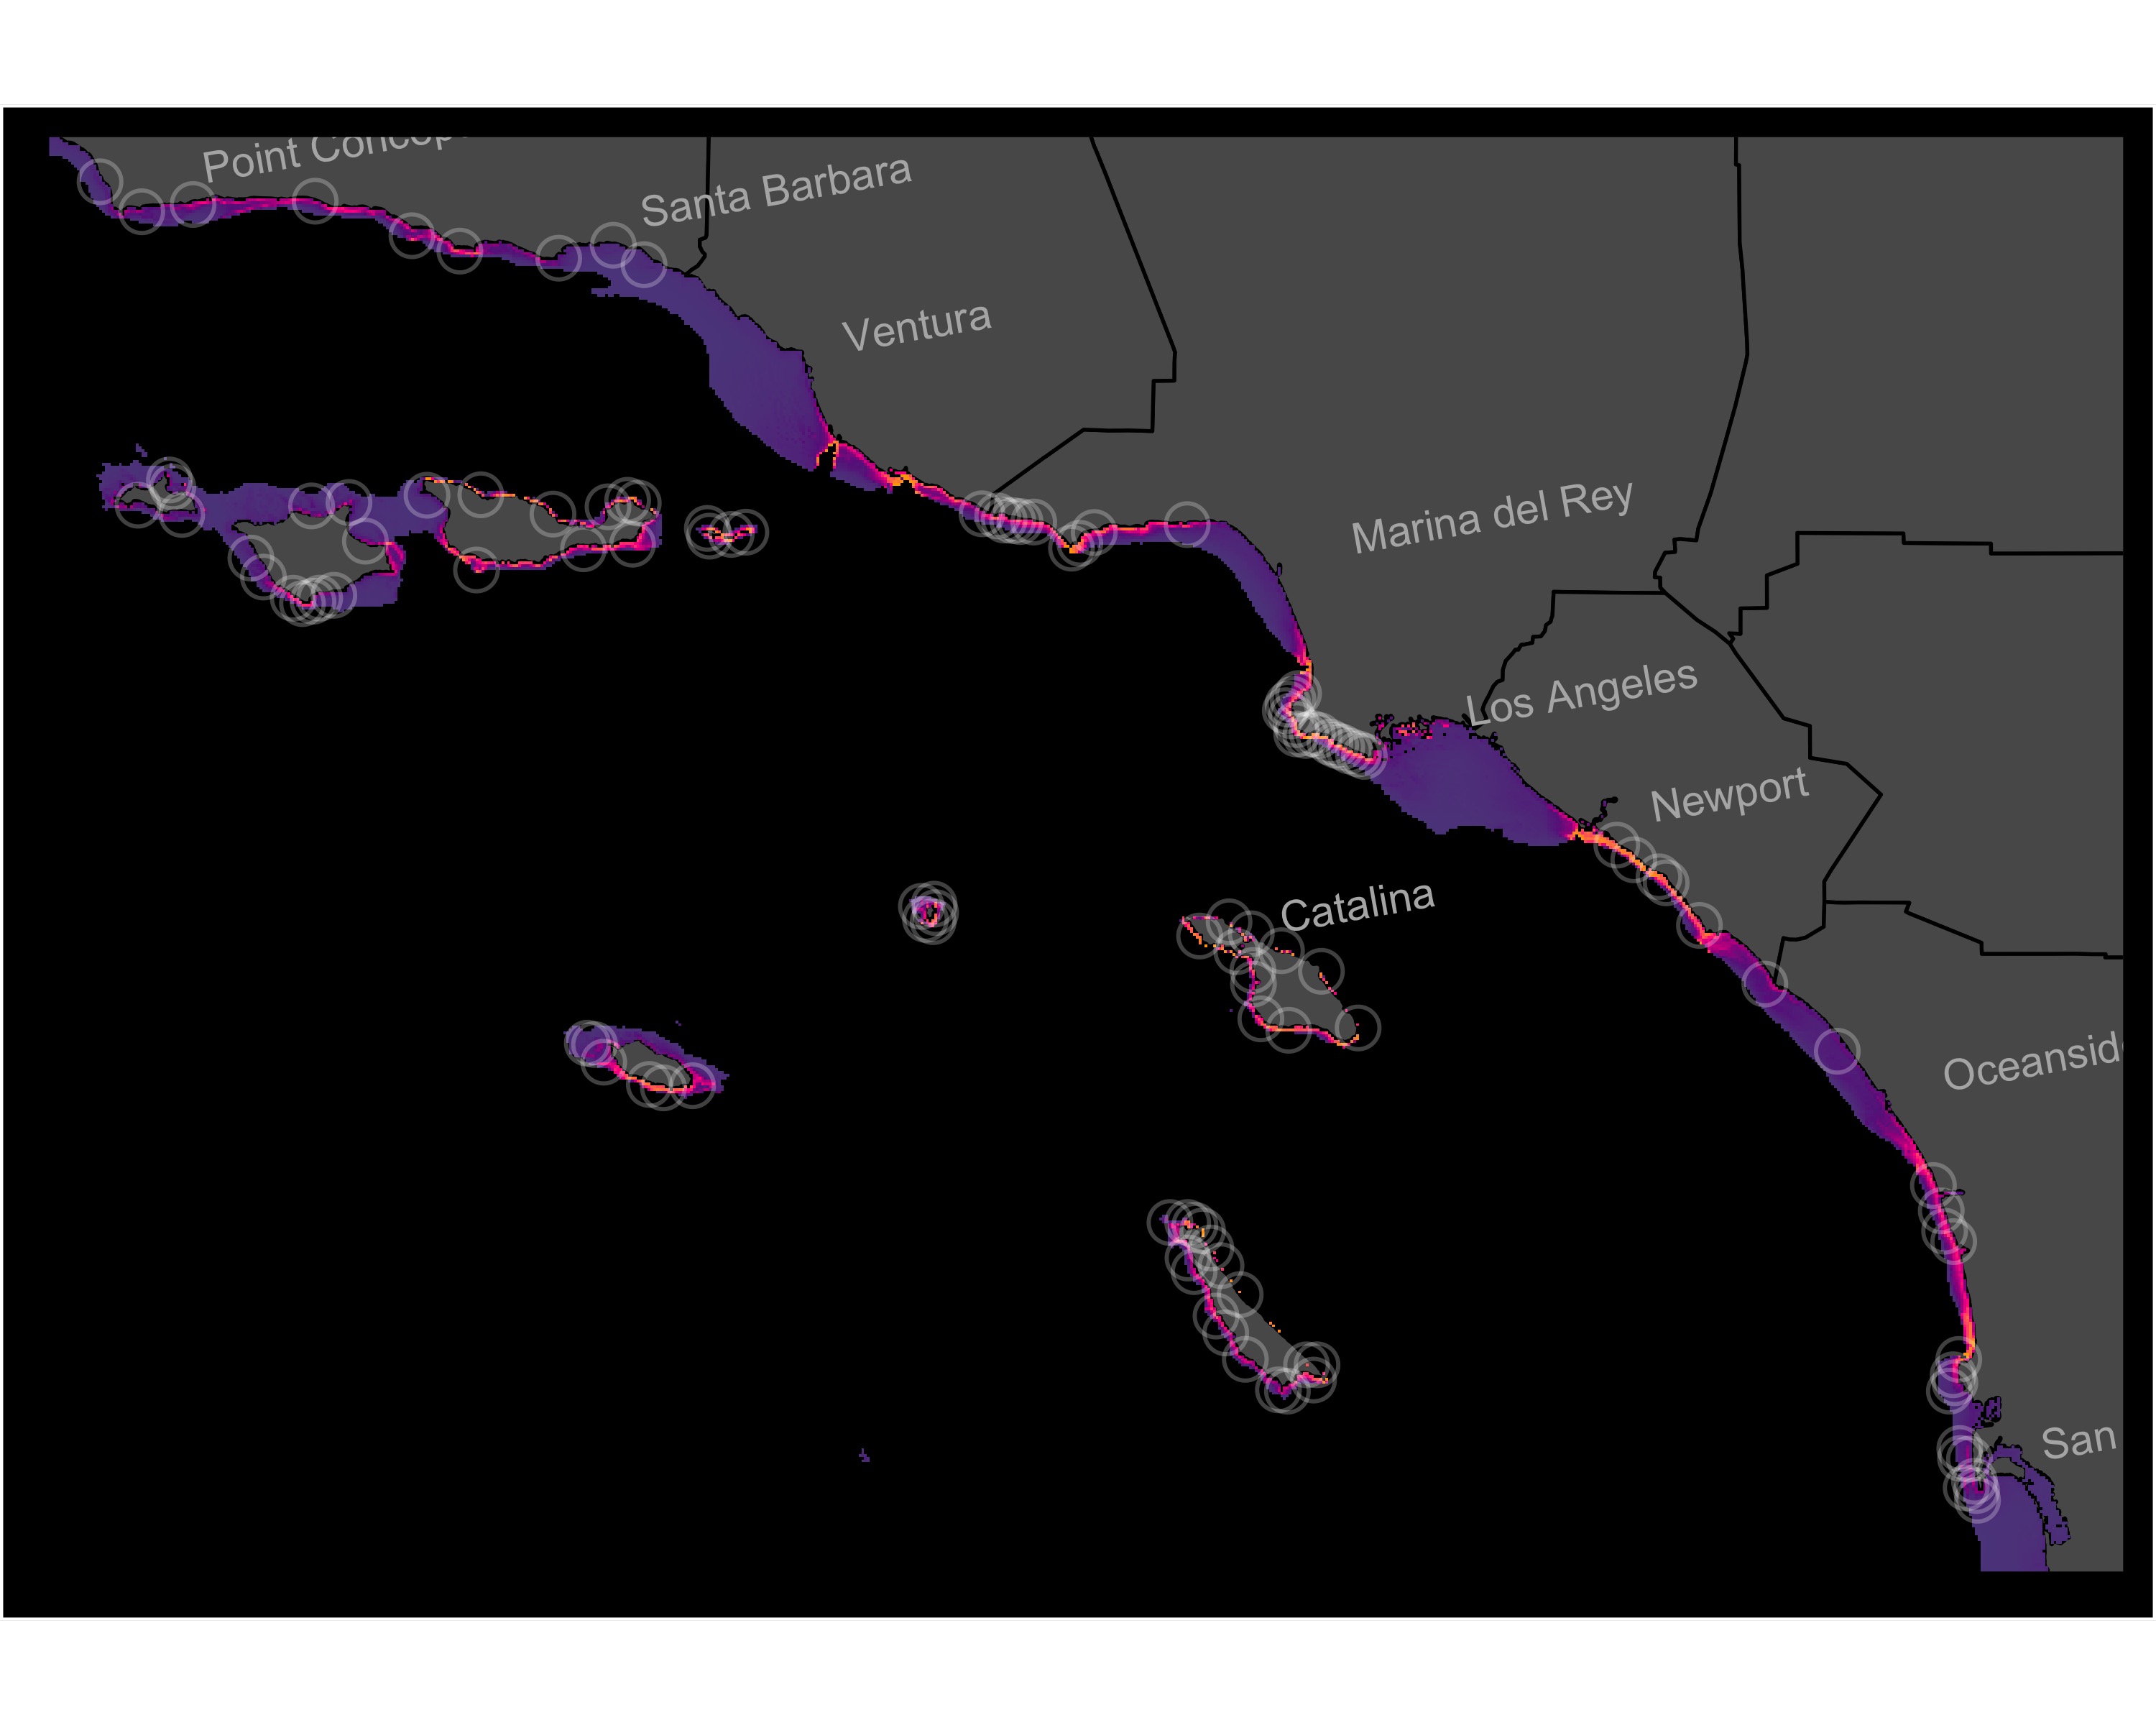


**Figure S4. Individual-SDM for *Macrocystis pyrifera* in the SCB.** Model shown is the best-fit model (Table 1) of 12 candidate models. White circles show all observations from natural reefs included in the training and test datasets.


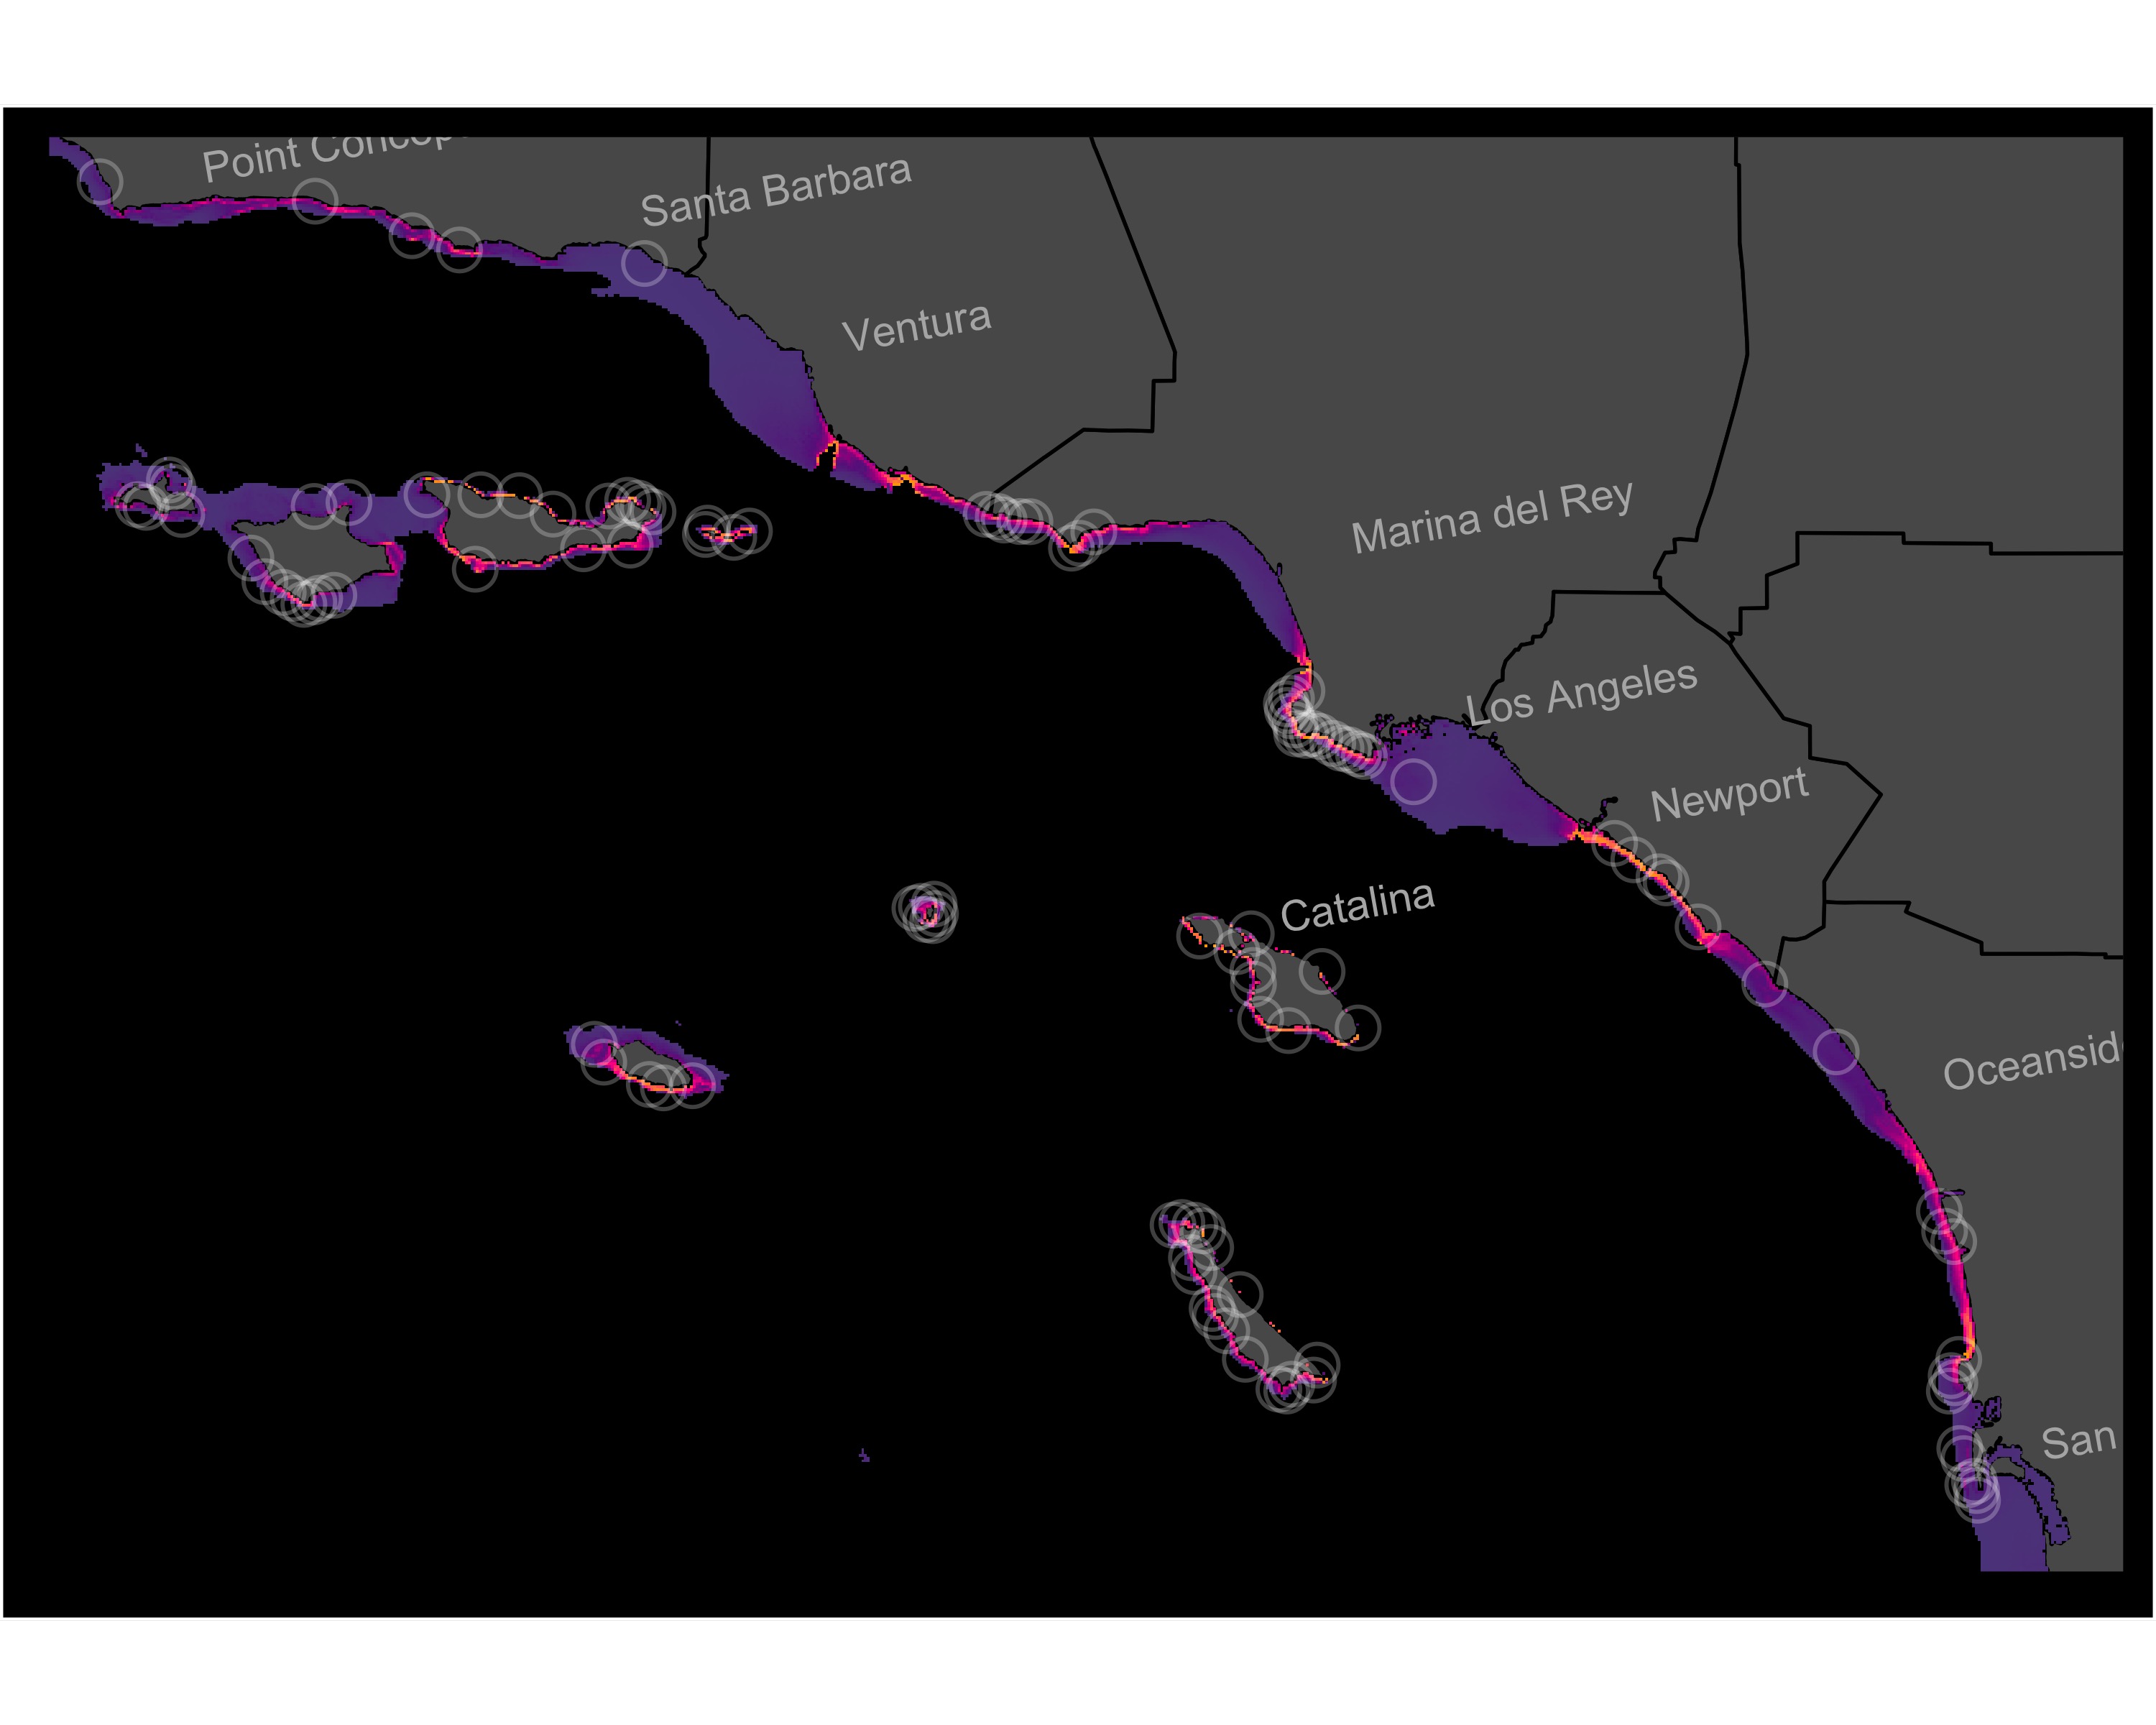


**Figure S5. Individual-SDM for *Megathura crenulata* in the SCB.** Model shown is the best-fit model (Table 1) of 12 candidate models. White circles show all observations from natural reefs included in the training and test datasets.


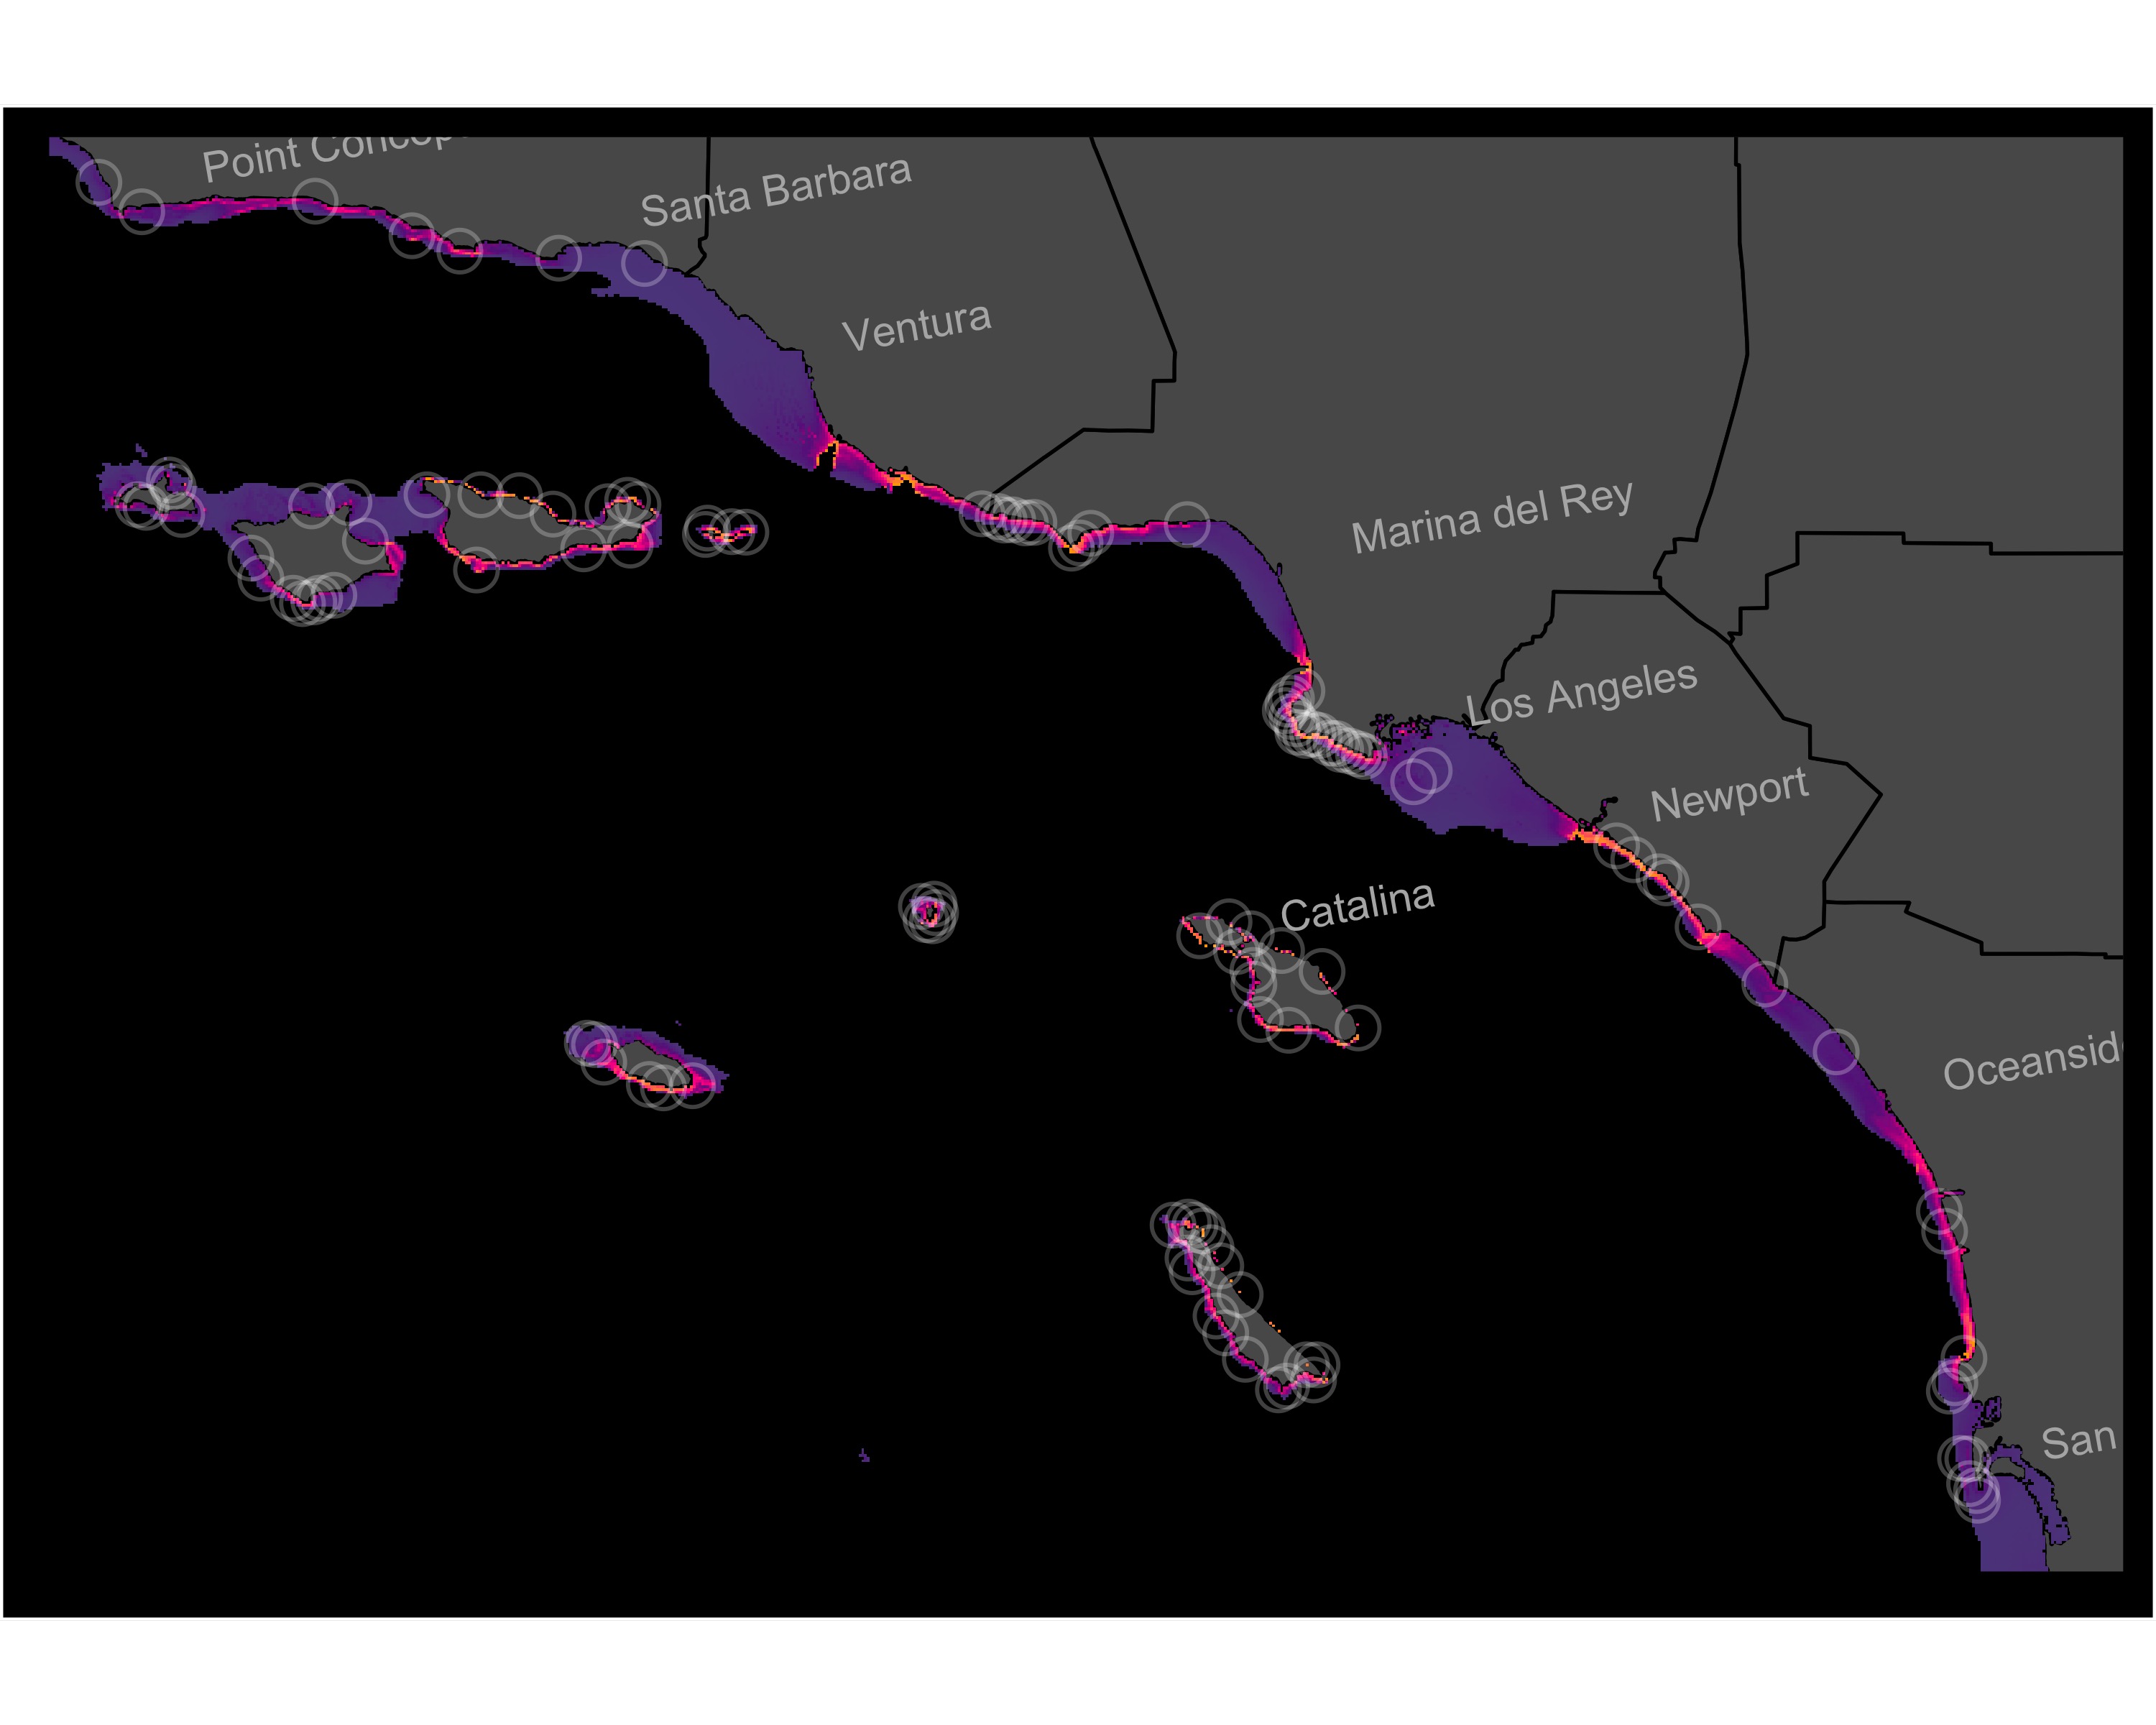


**Figure S6. Individual-SDM for *Mesocentrotus franciscanus* in the SCB.** Model shown is the best-fit model (Table 1) of 12 candidate models. White circles show all observations from natural reefs included in the training and test datasets.


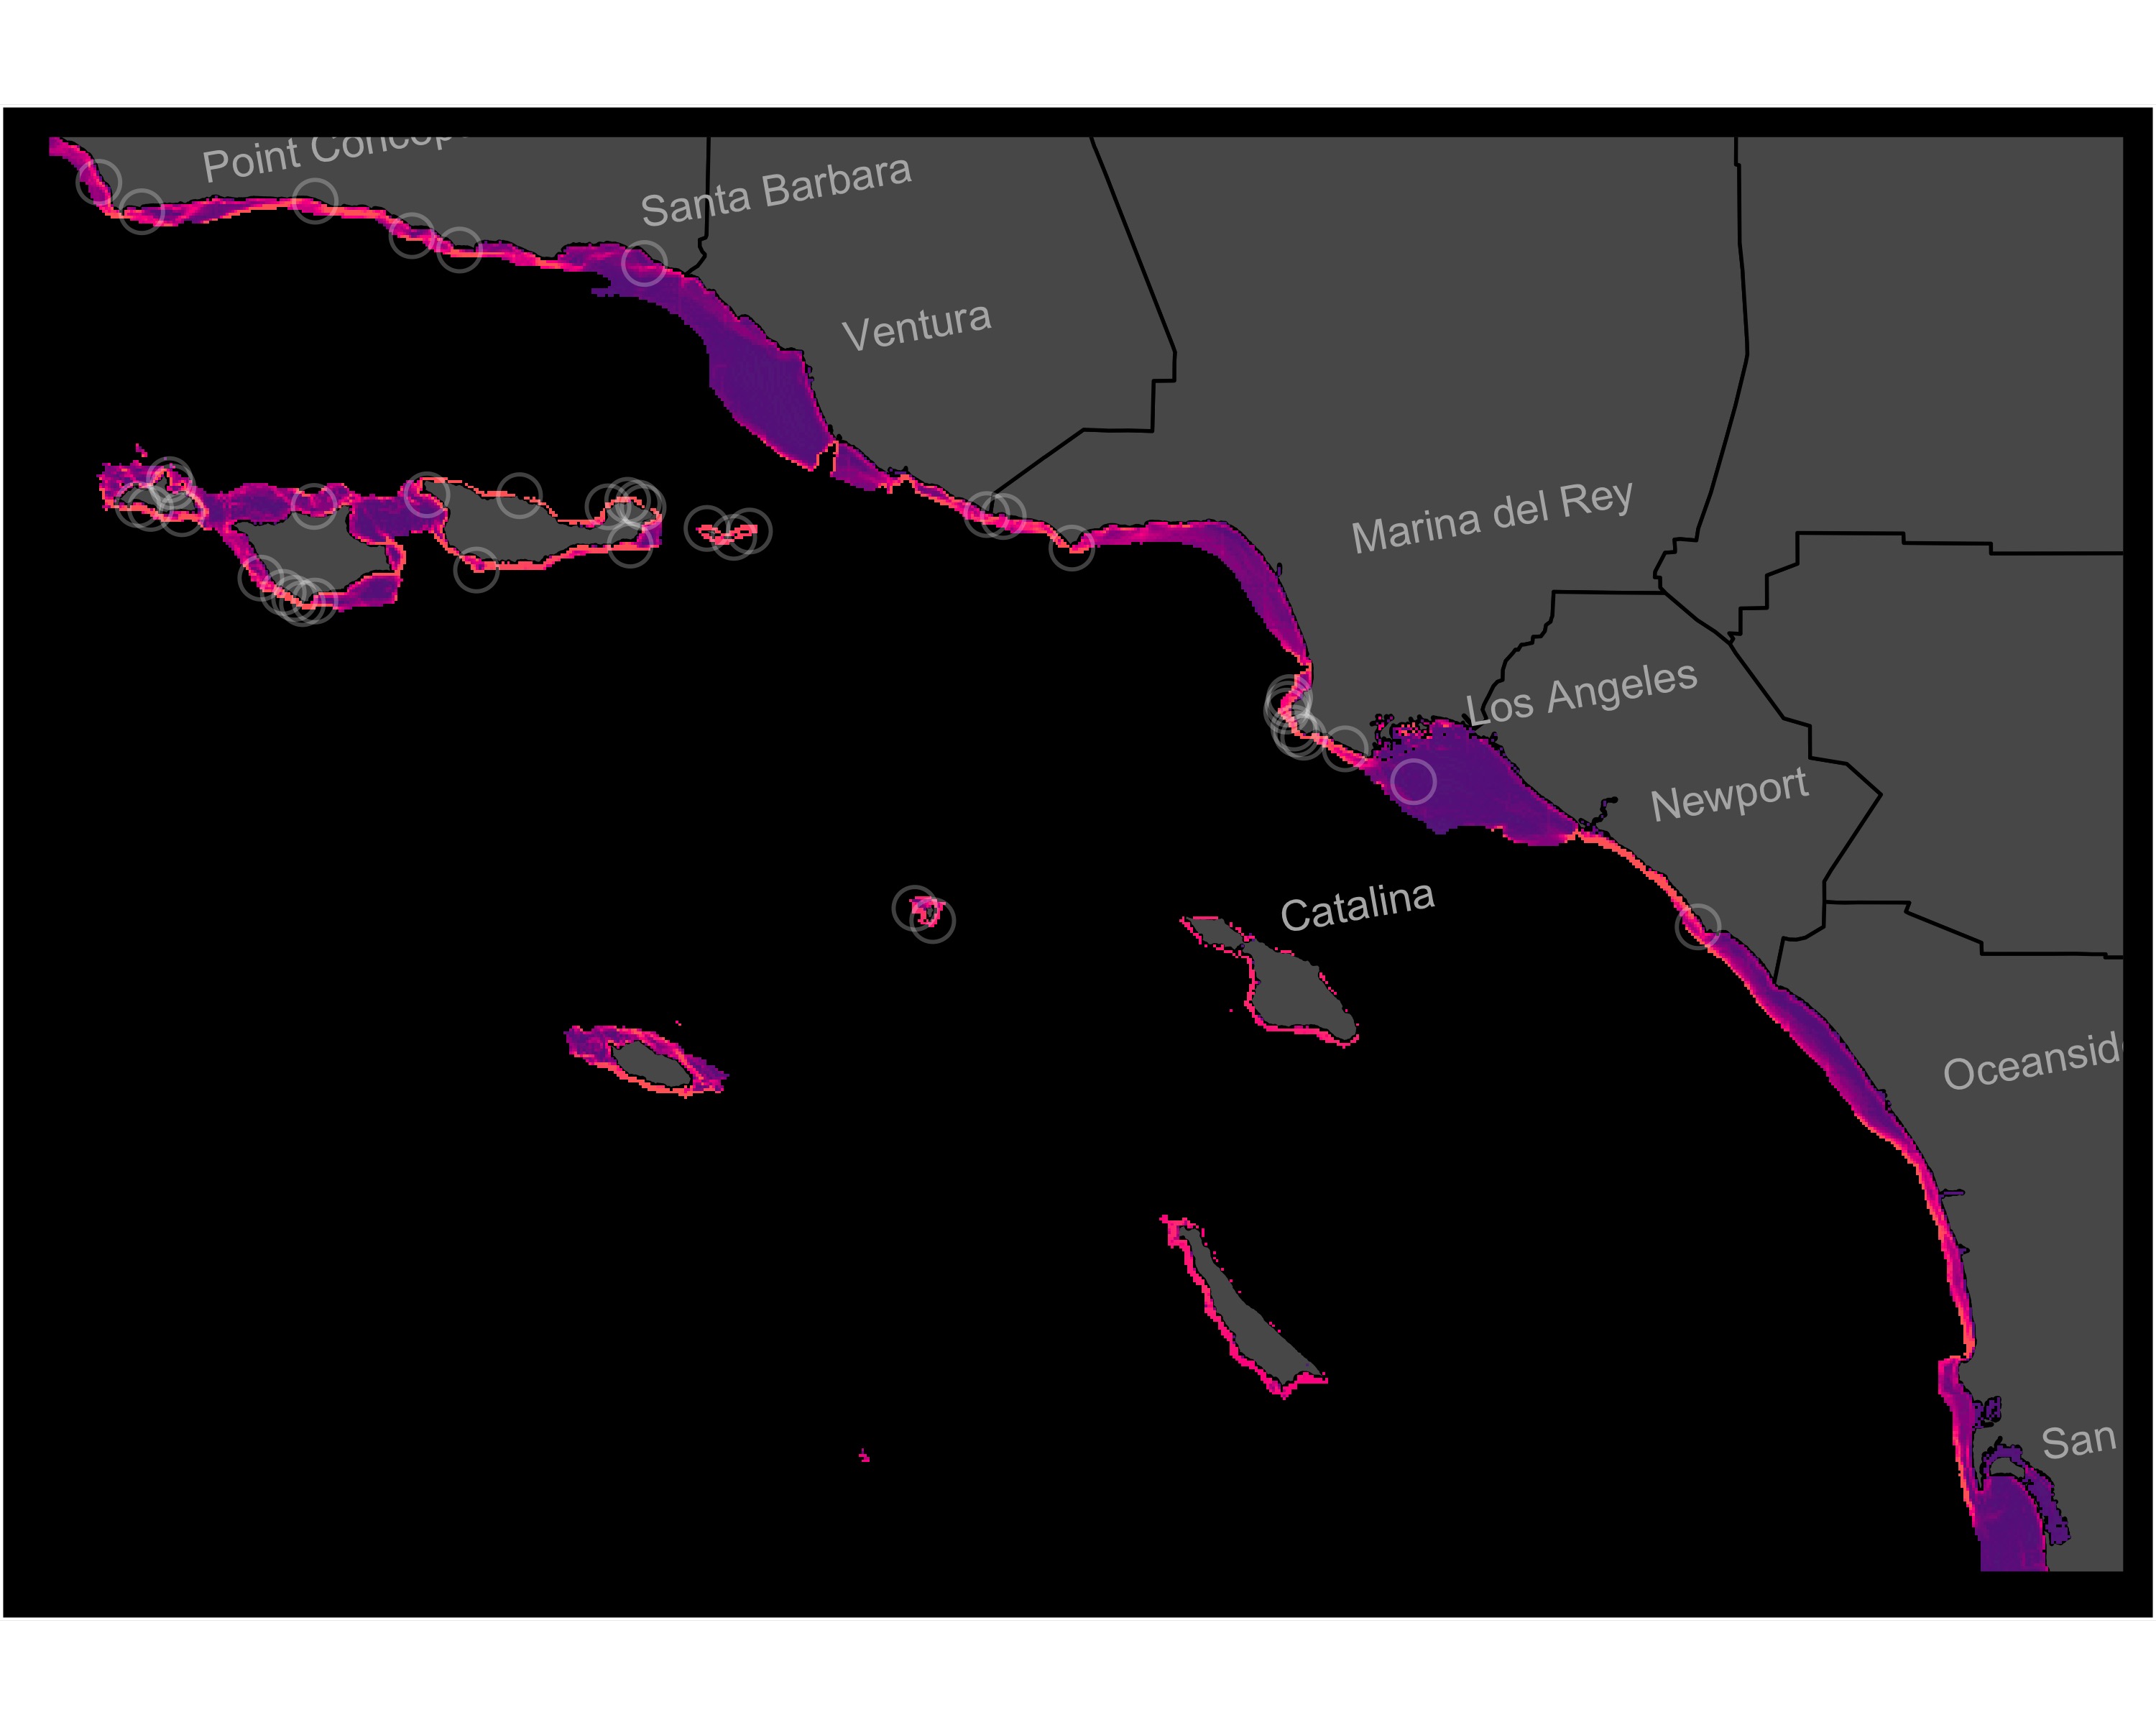


**Figure S7. Individual-SDM for *Ophiodon elongatus* in the SCB.** Model shown is the best-fit model (Table 1) of 12 candidate models. White circles show all observations from natural reefs included in the training and test datasets.


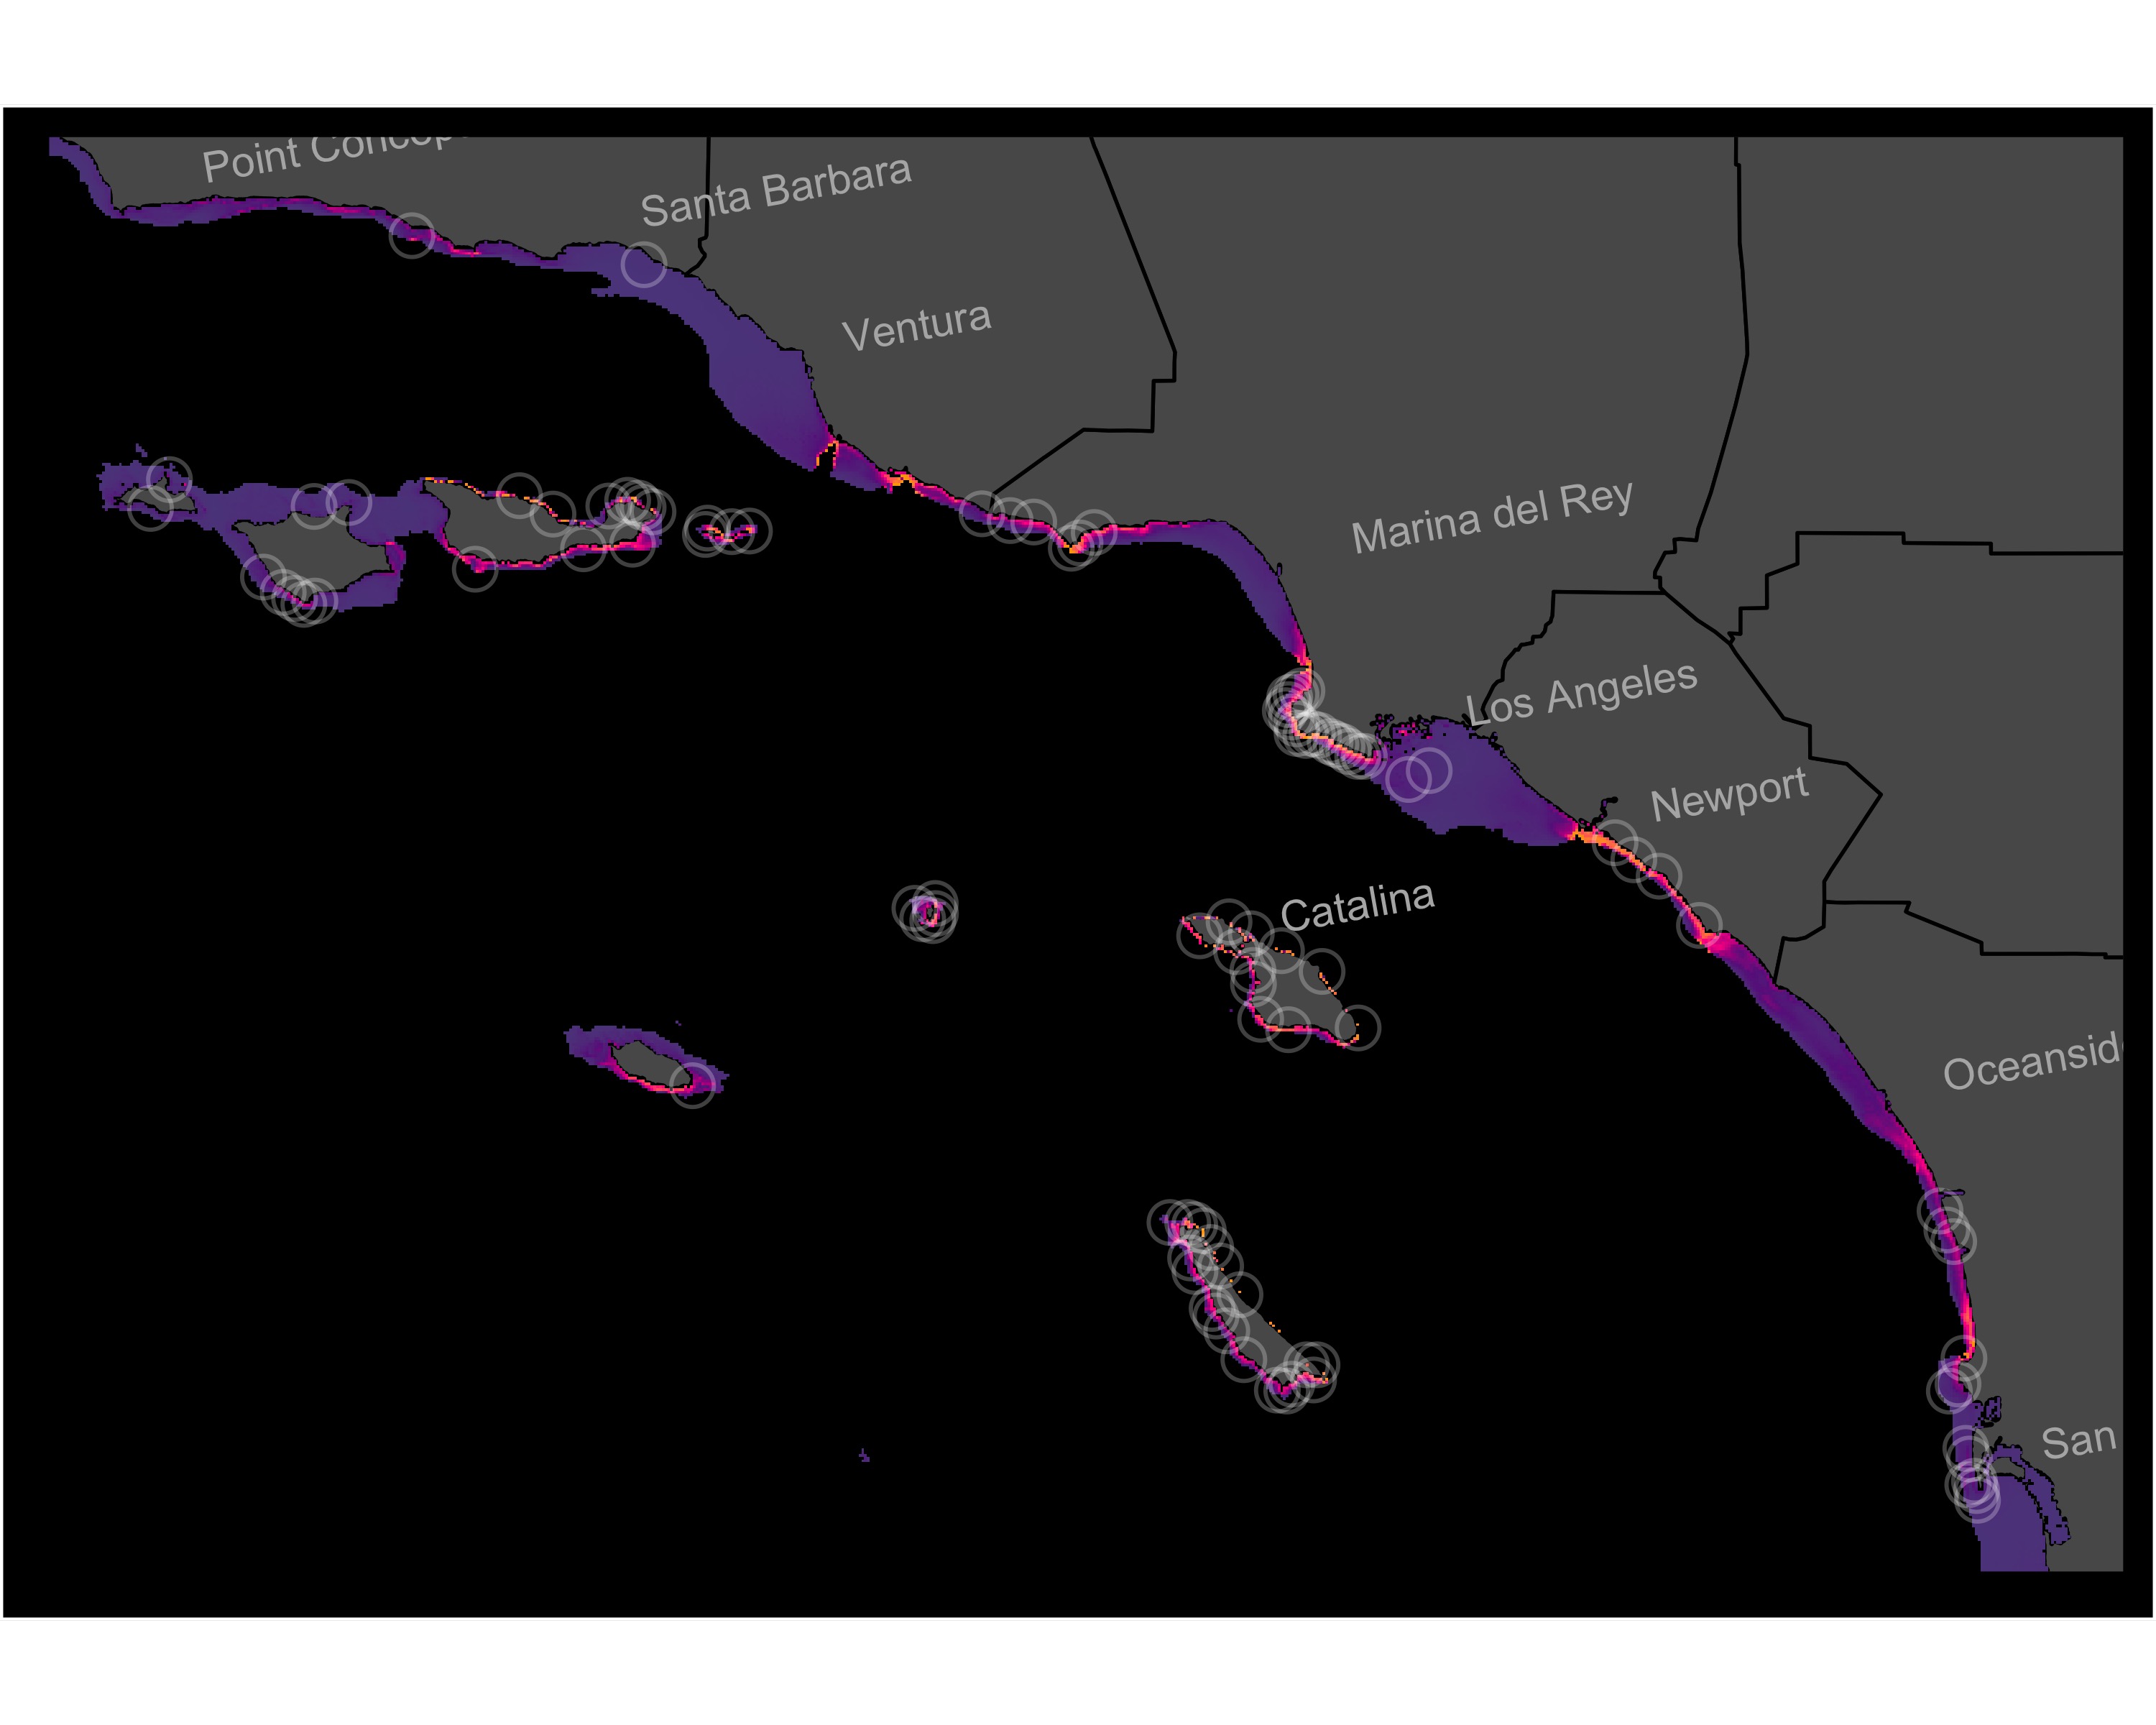


**Figure S8. Individual-SDM for *Panulirus interruptus* in the SCB.** Model shown is the best-fit model (Table 1) of 12 candidate models. White circles show all observations from natural reefs included in the training and test datasets.


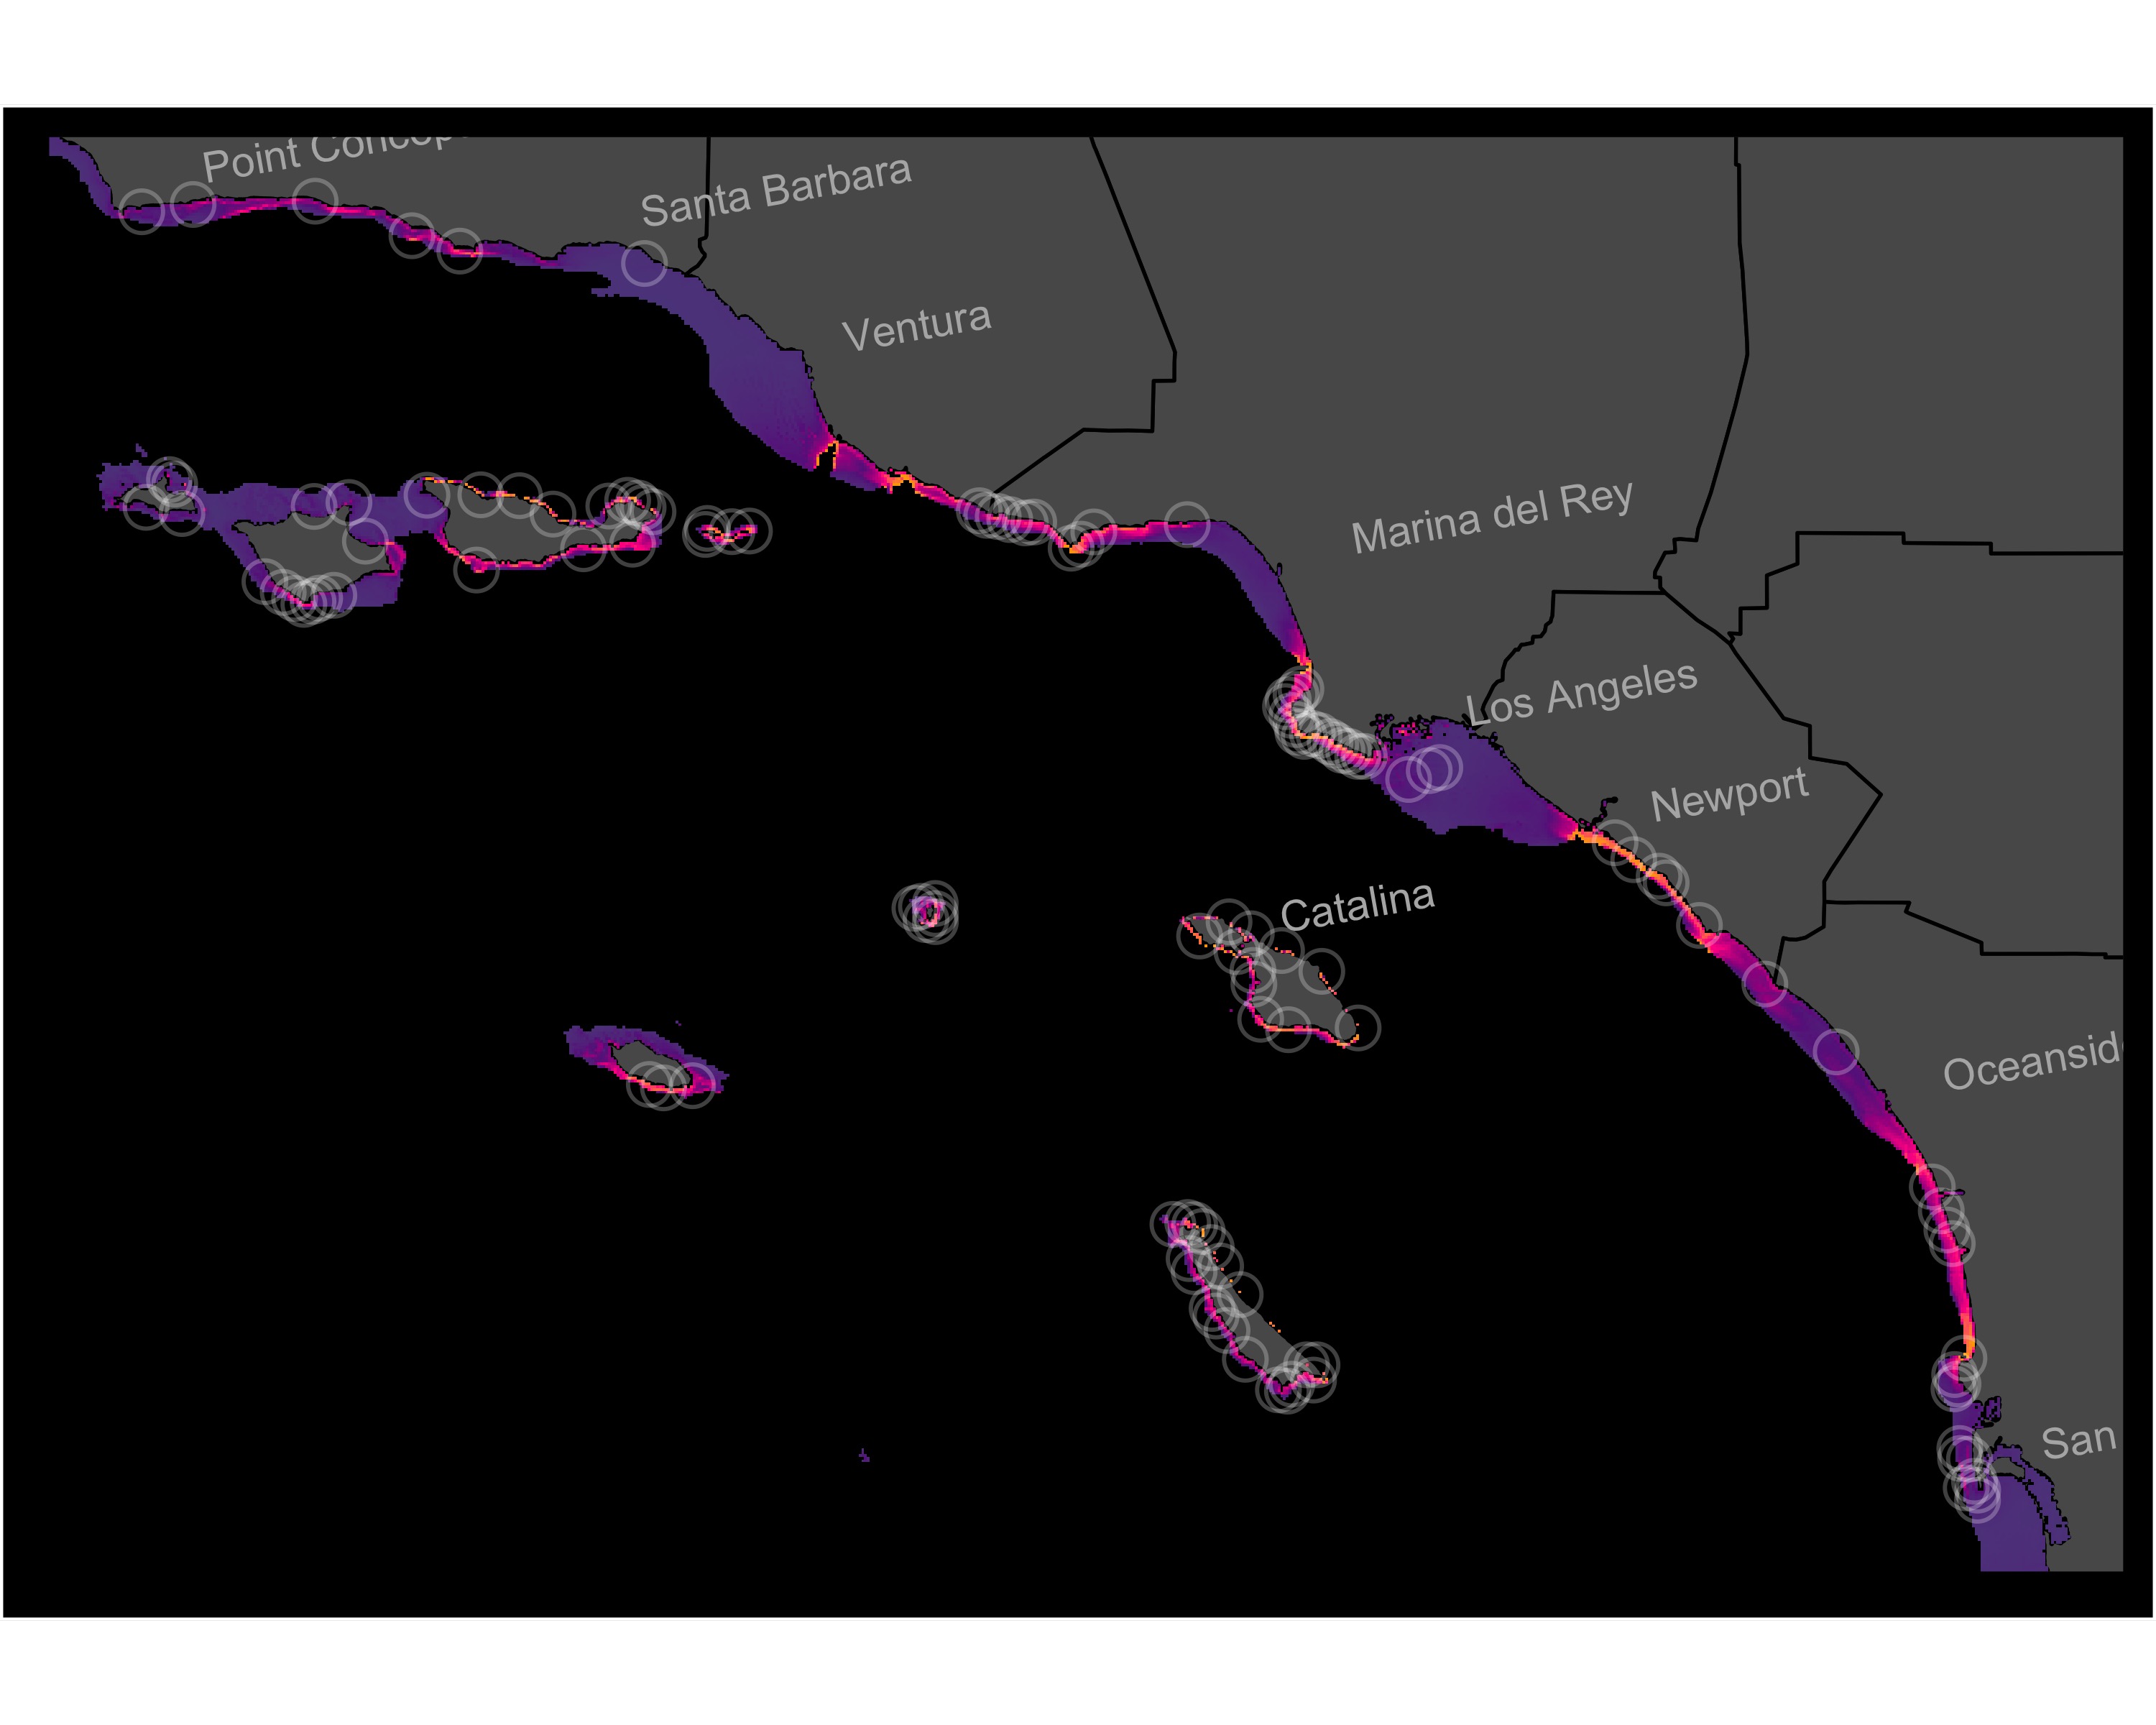


**Figure S9. Individual-SDM for *Paralabrax clathratus* in the SCB.** Model shown is the best-fit model (Table 1) of 12 candidate models. White circles show all observations from natural reefs included in the training and test datasets.


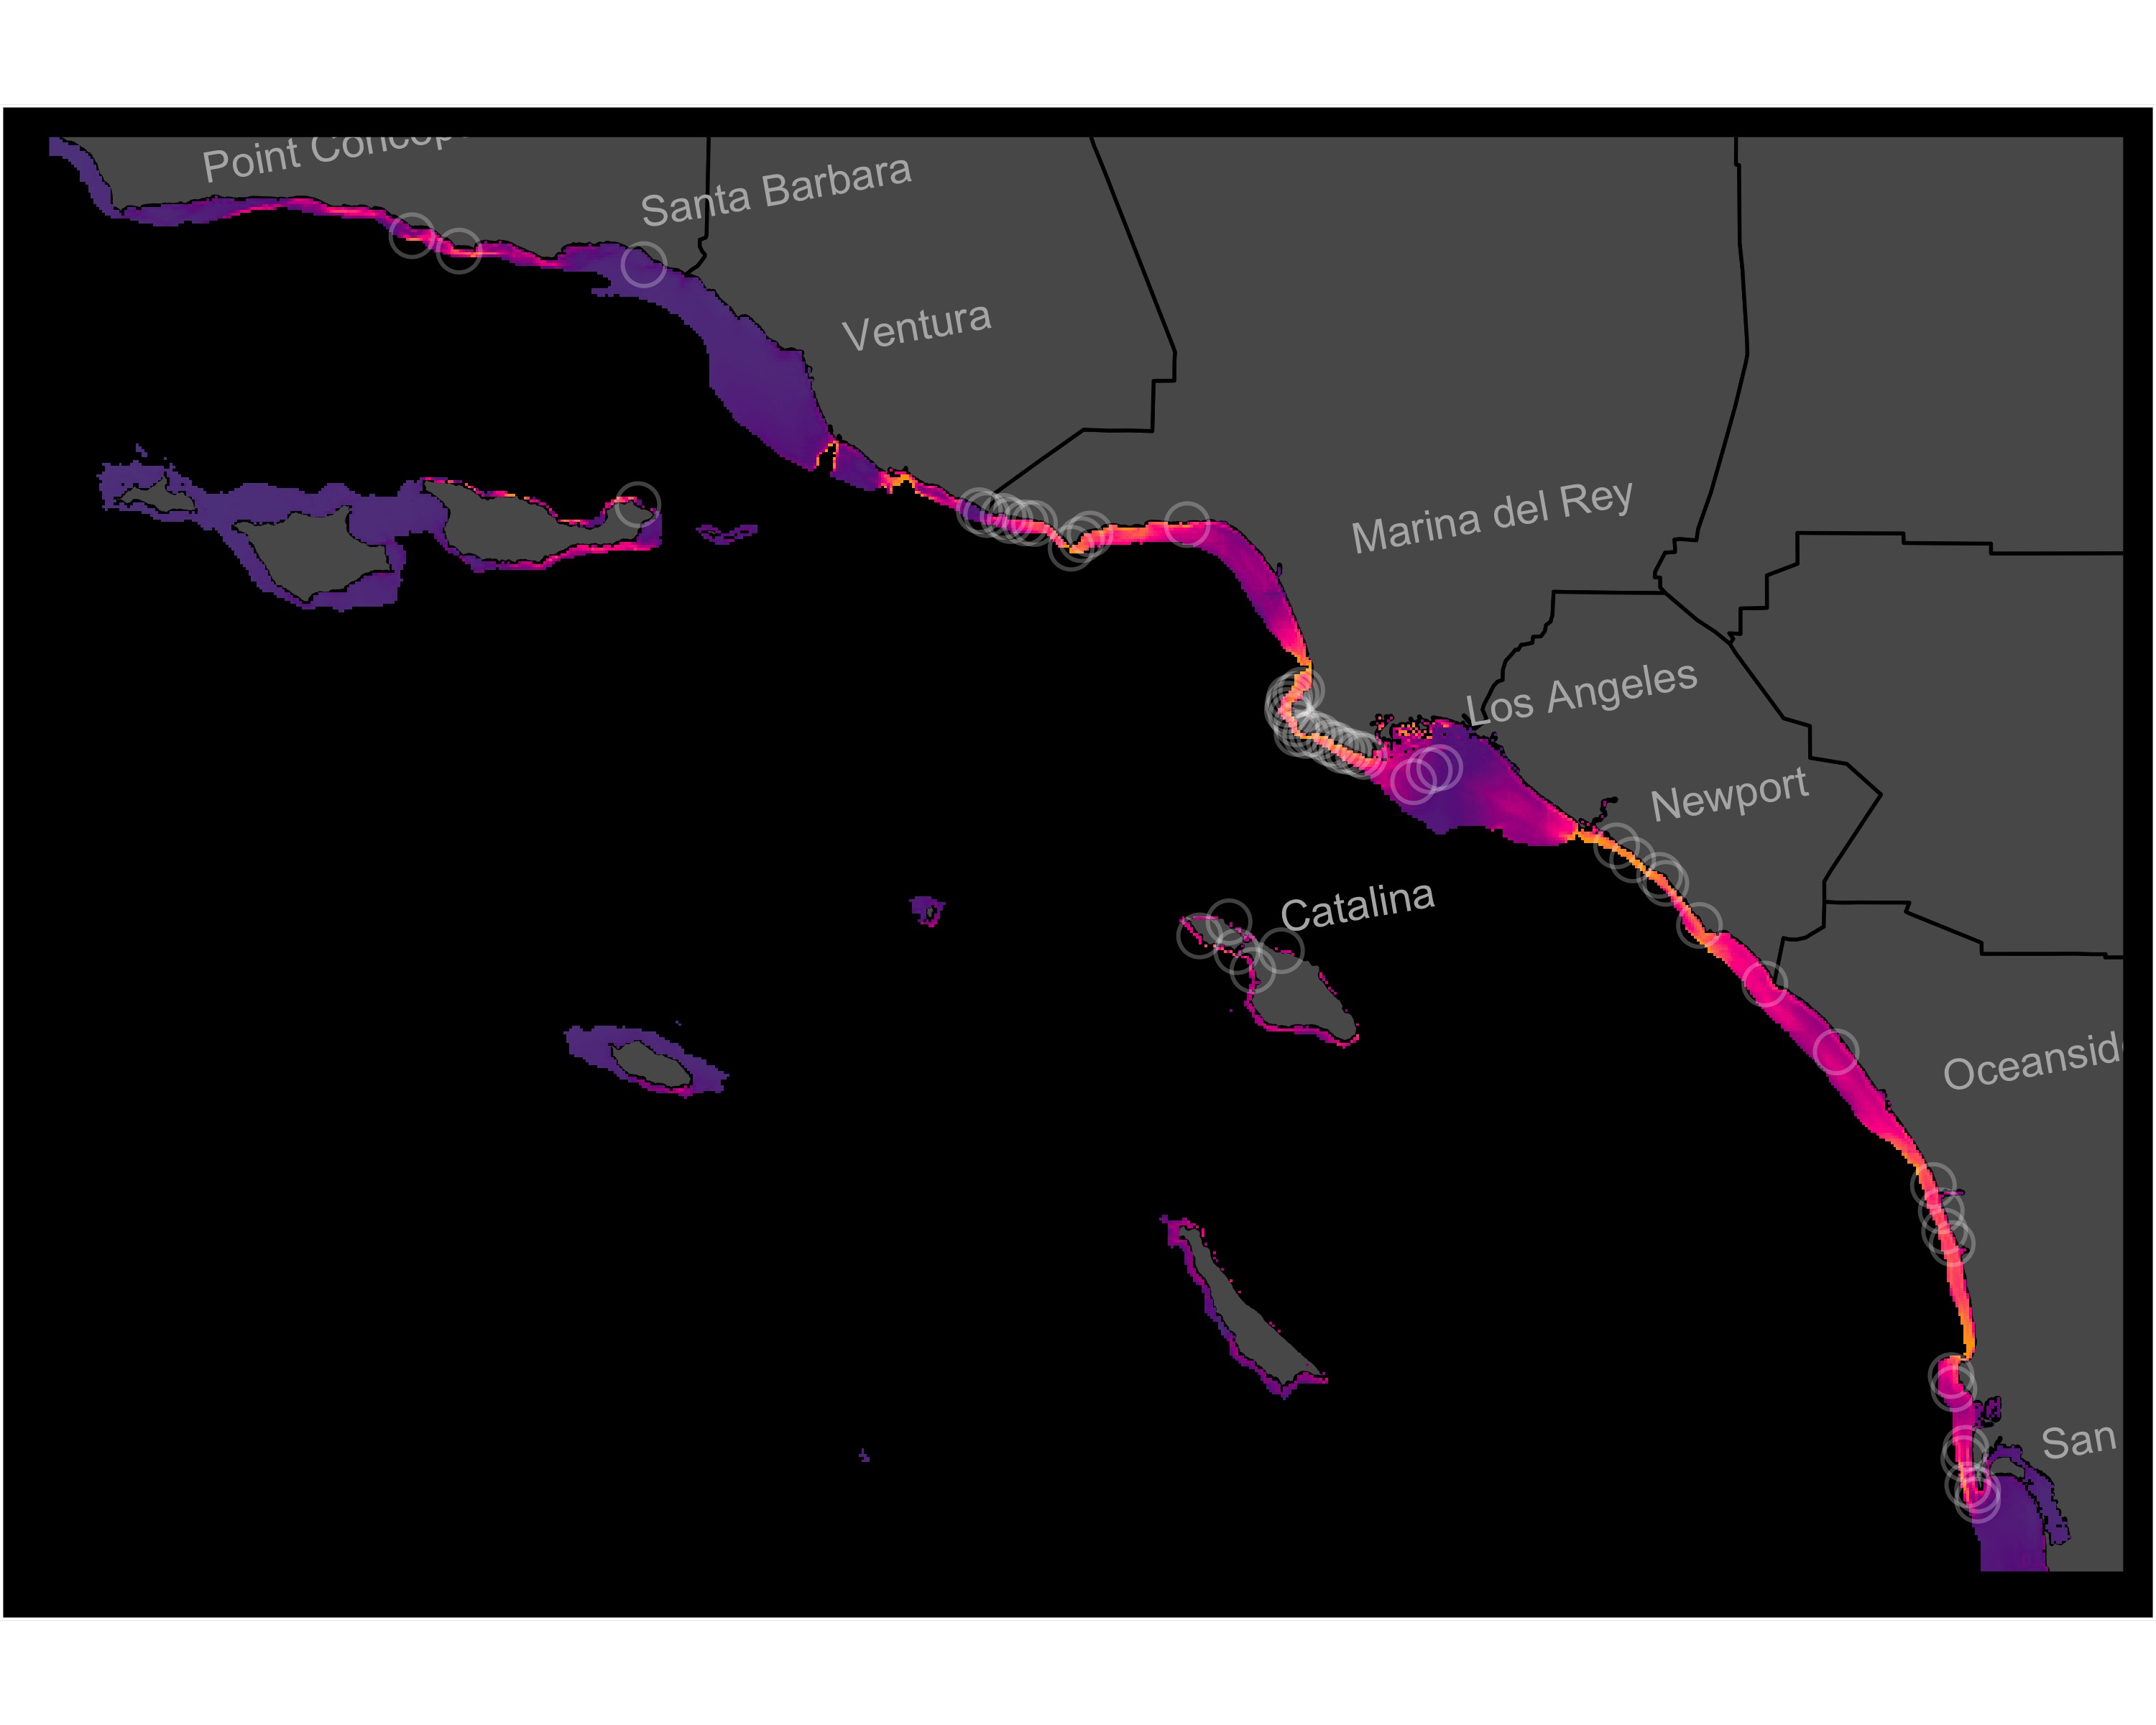


**Figure S10. Individual-SDM for *Paralabrax nebulifer* in the SCB.** Model shown is the best-fit model (Table 1) of 12 candidate models. White circles show all observations from natural reefs included in the training and test datasets.


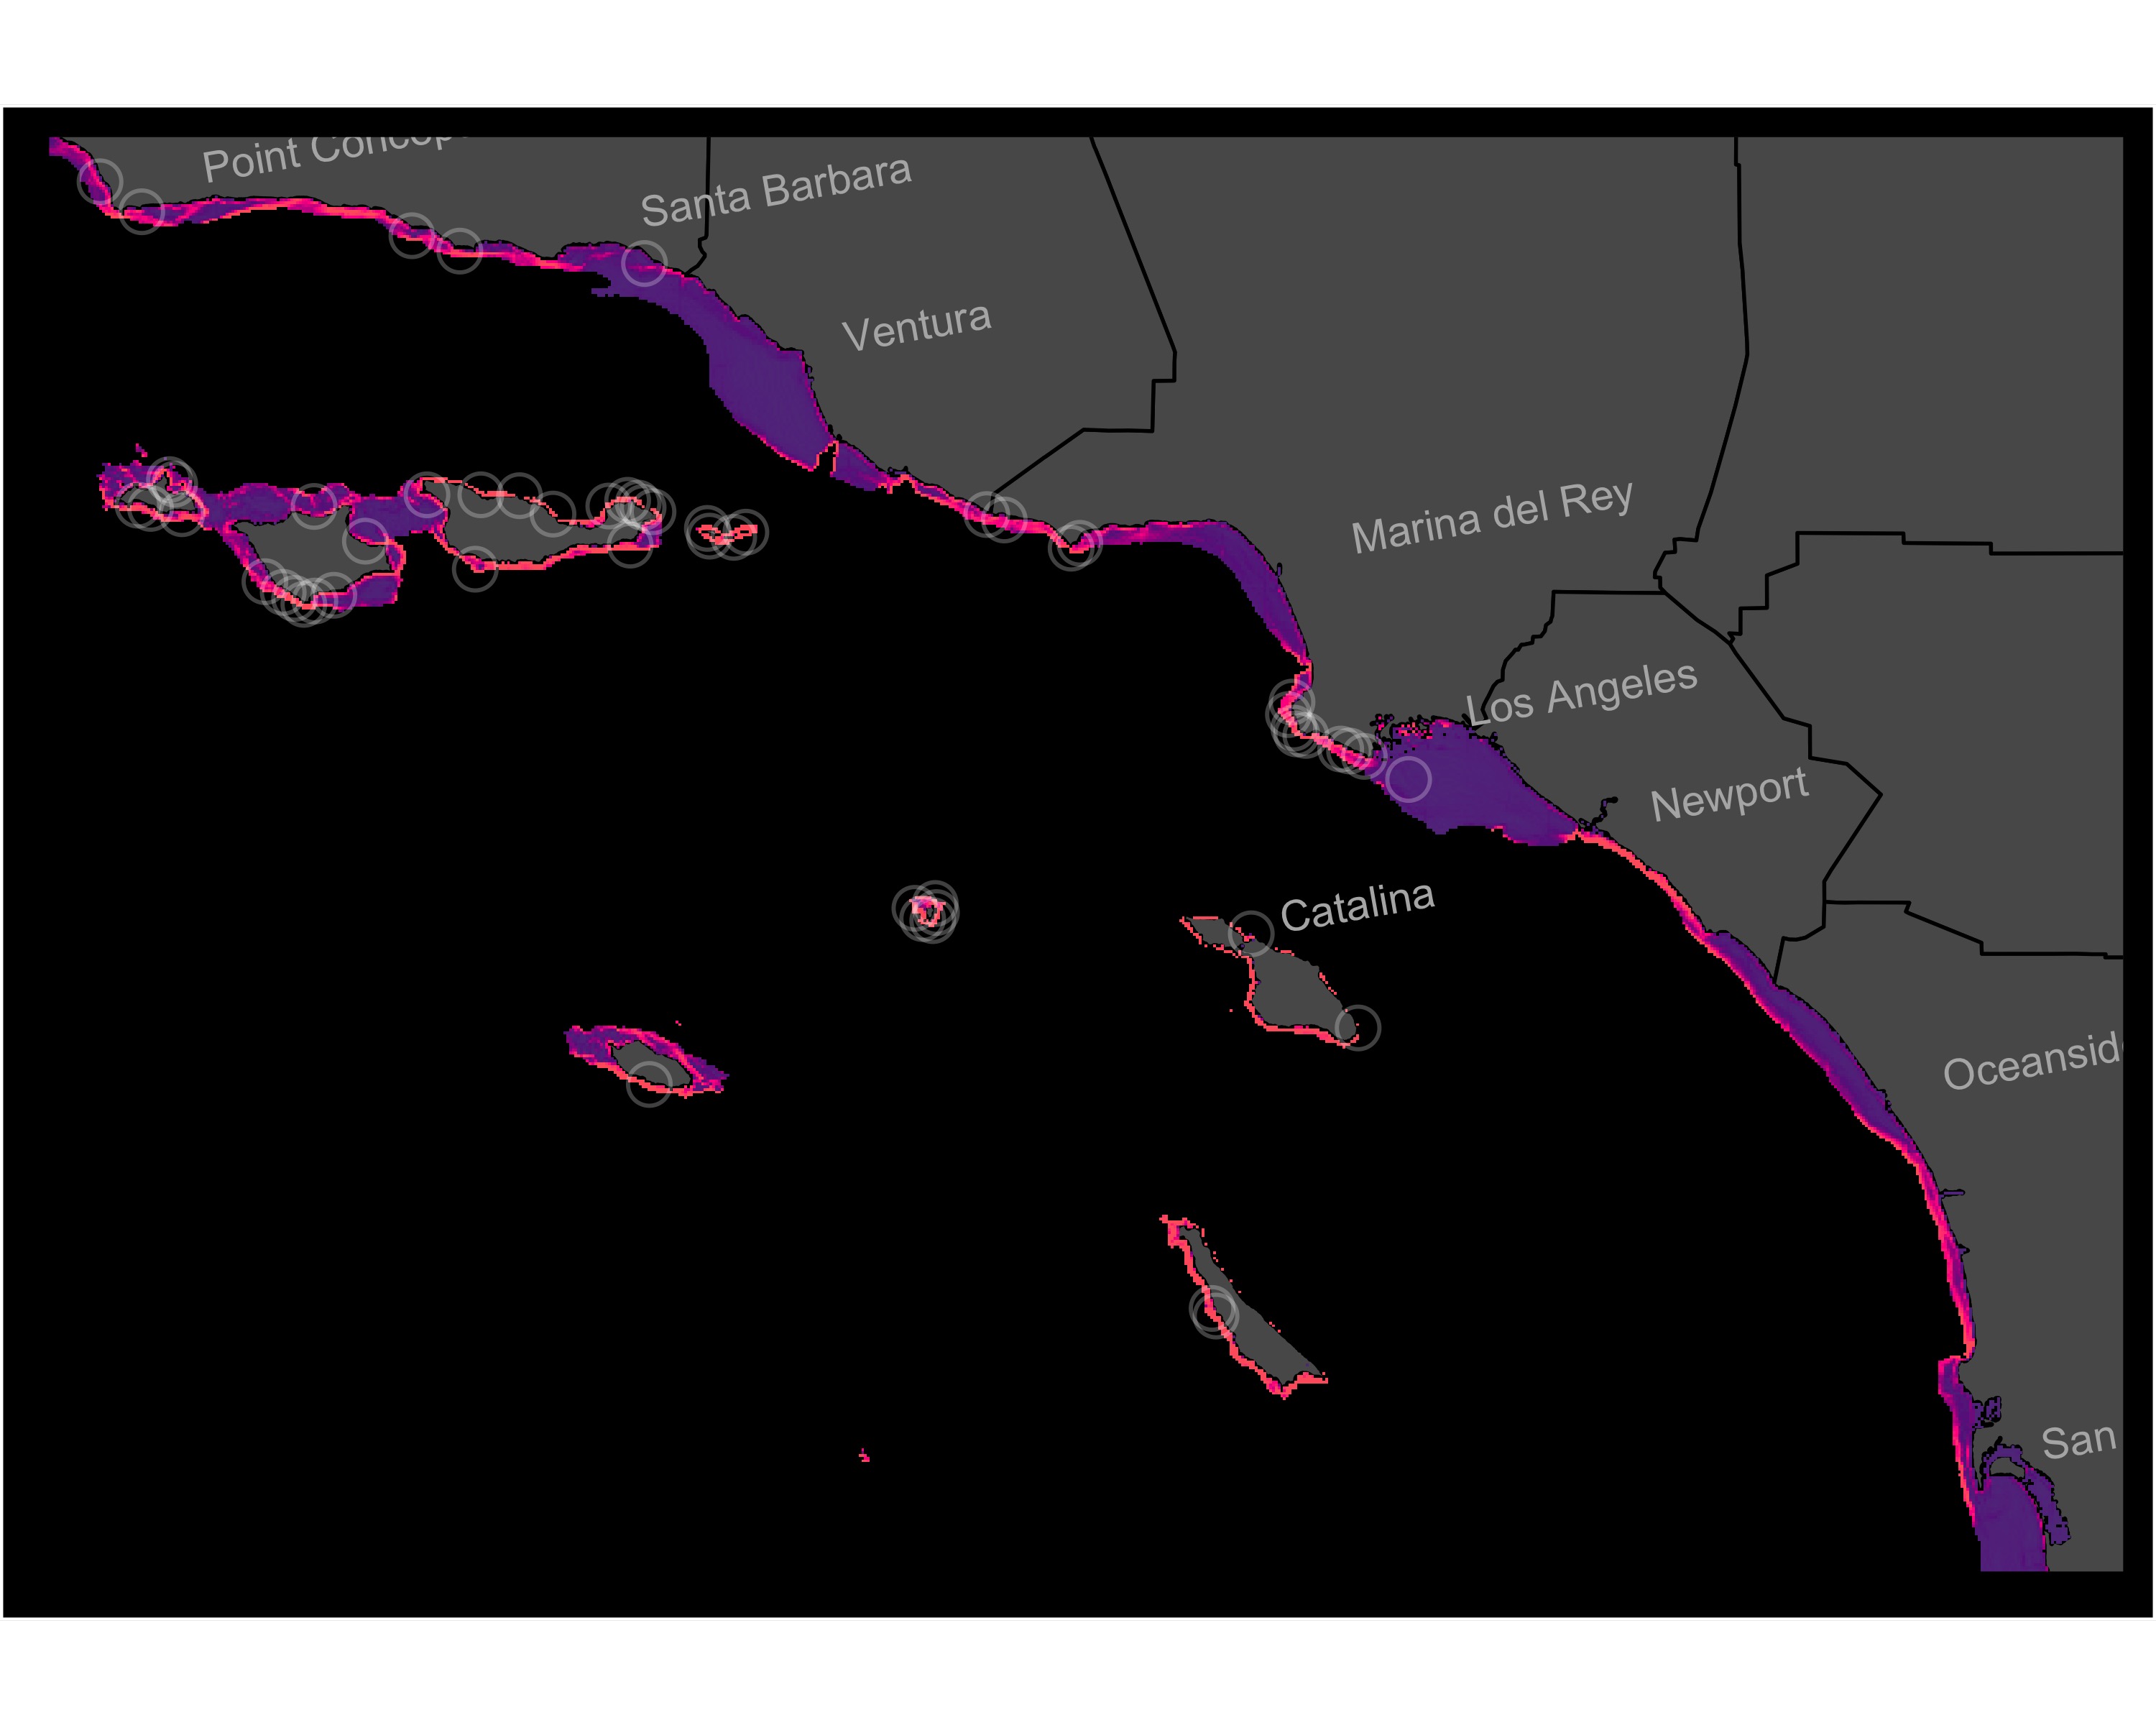


**Figure S11. Individual-SDM for *Scorpaenichthys marmoratus* in the SCB.** Model shown is the best-fit model (Table 1) of 12 candidate models. White circles show all observations from natural reefs included in the training and test datasets.


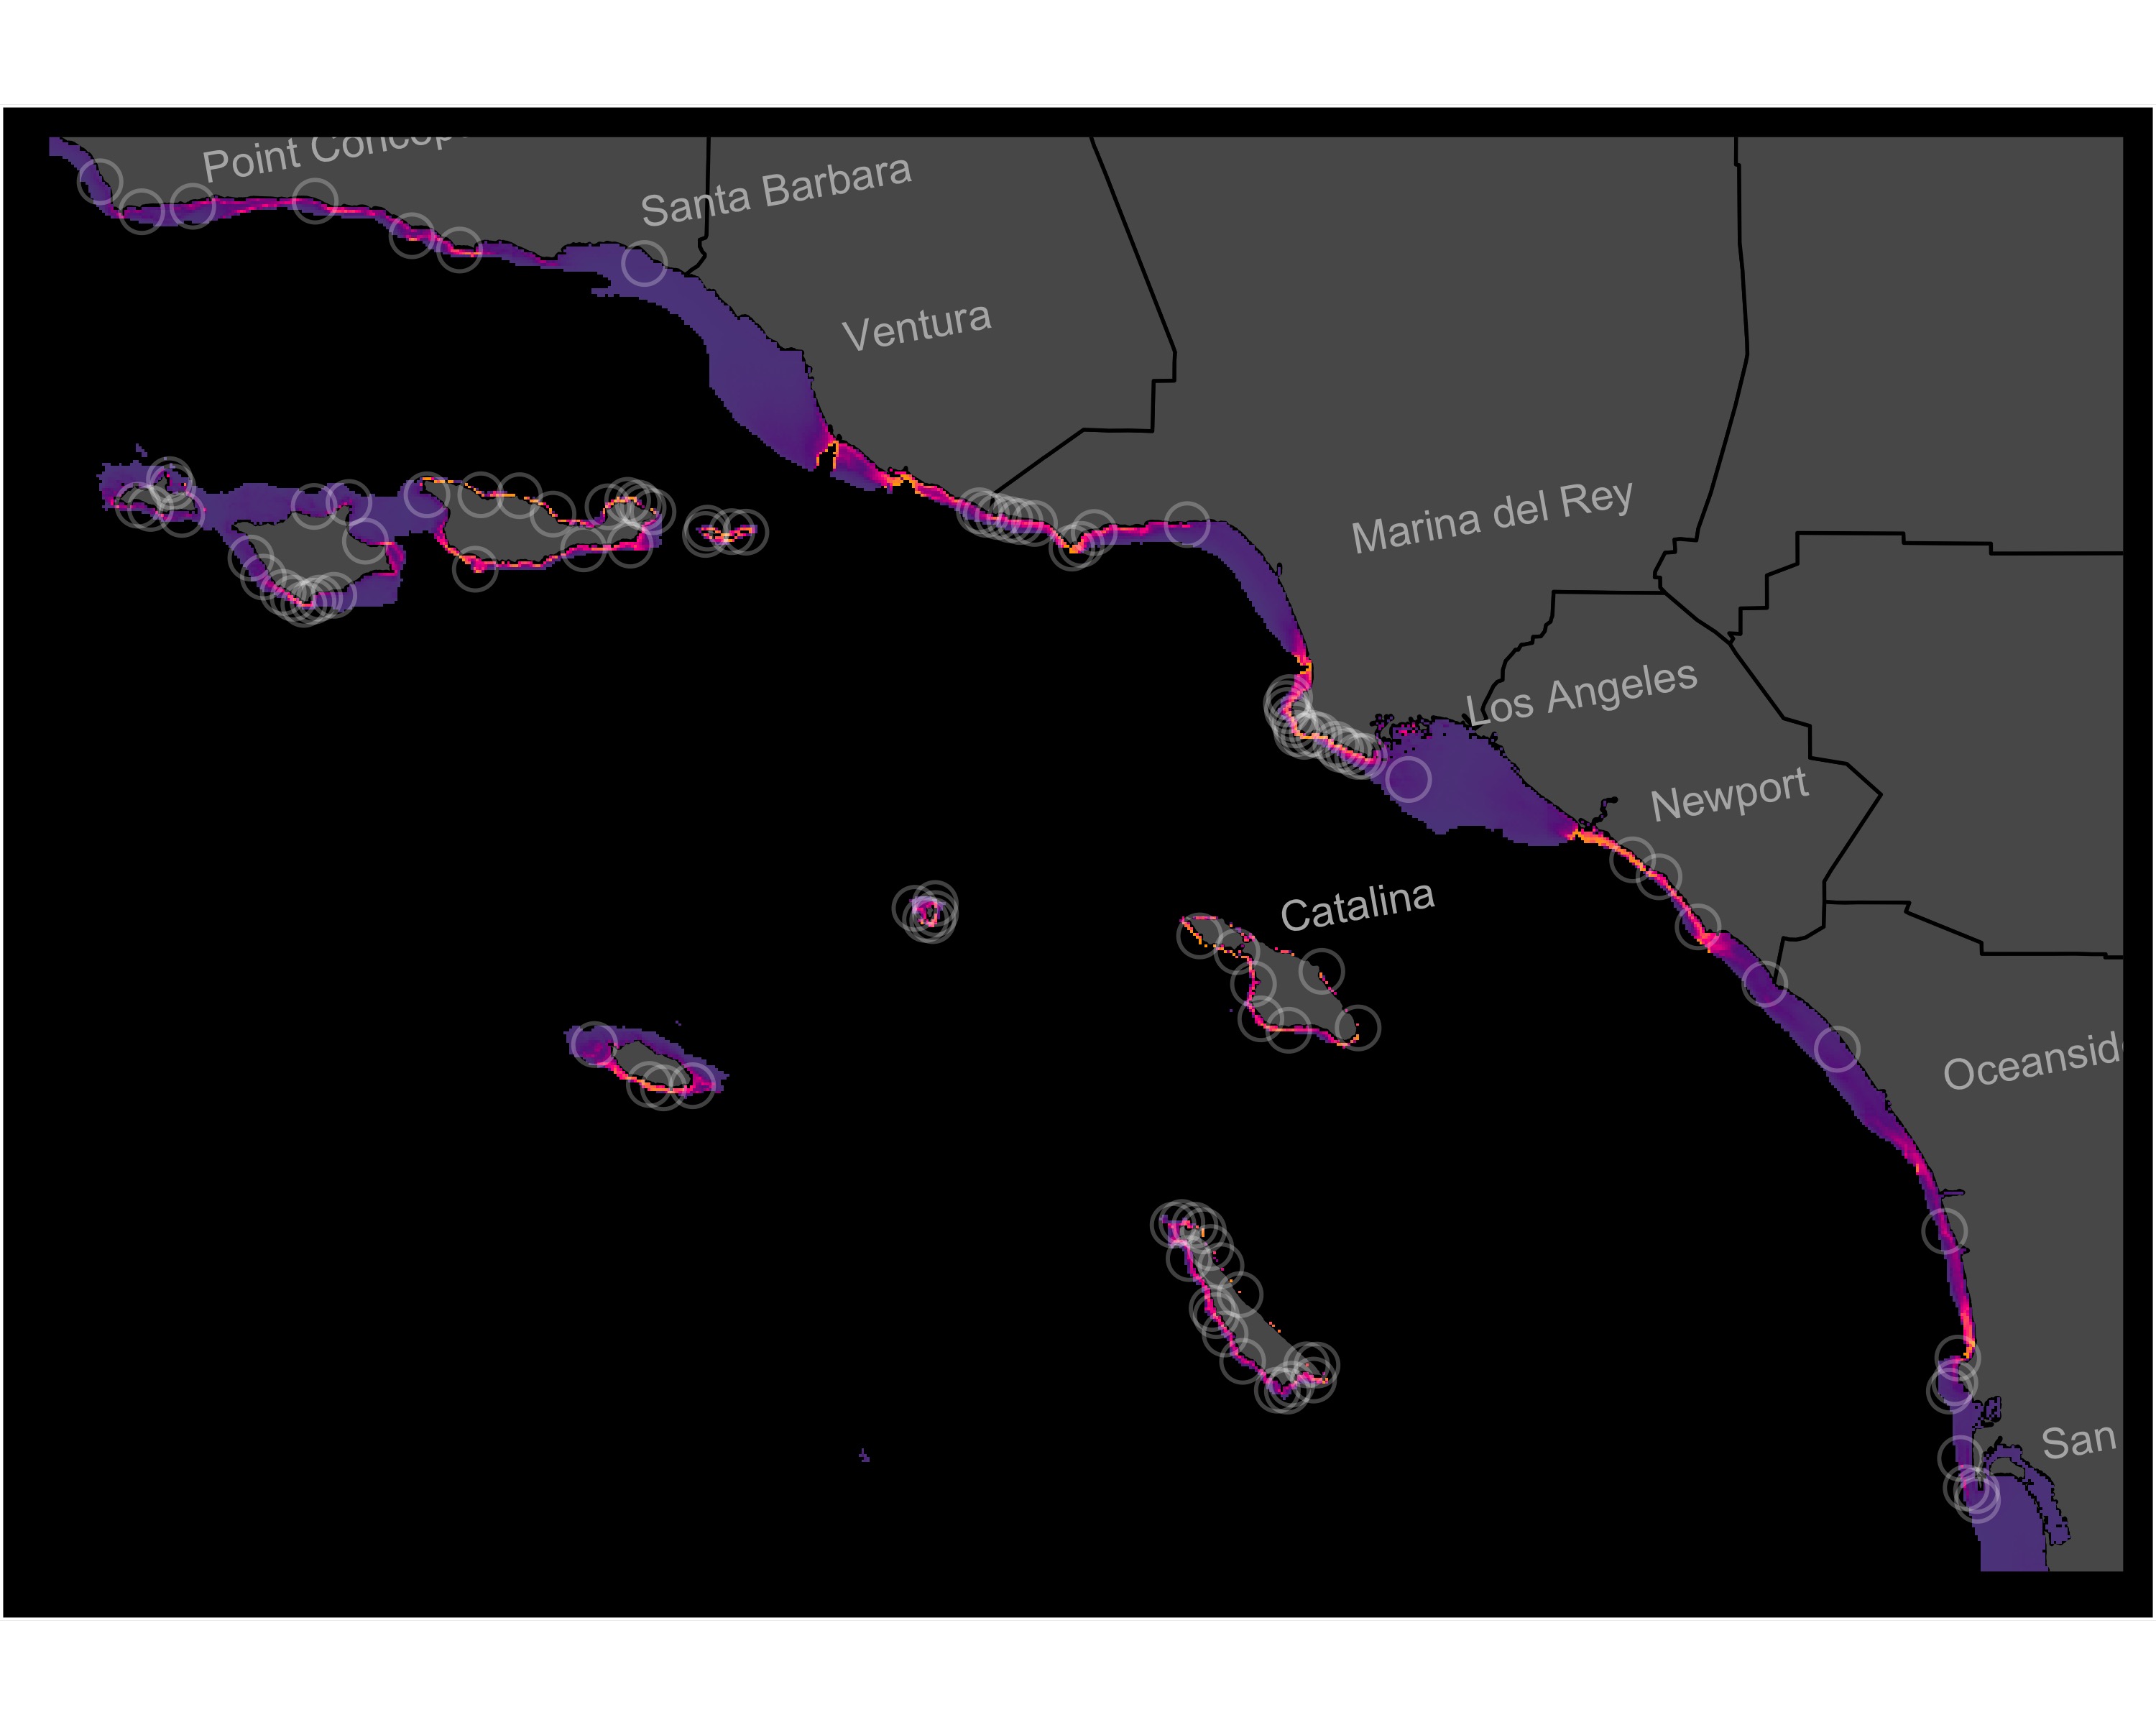


**Figure S12. Individual-SDM for *Sebastes atrovirens* in the SCB.** Model shown is the best-fit model (Table 1) of 12 candidate models. White circles show all observations from natural reefs included in the training and test datasets.


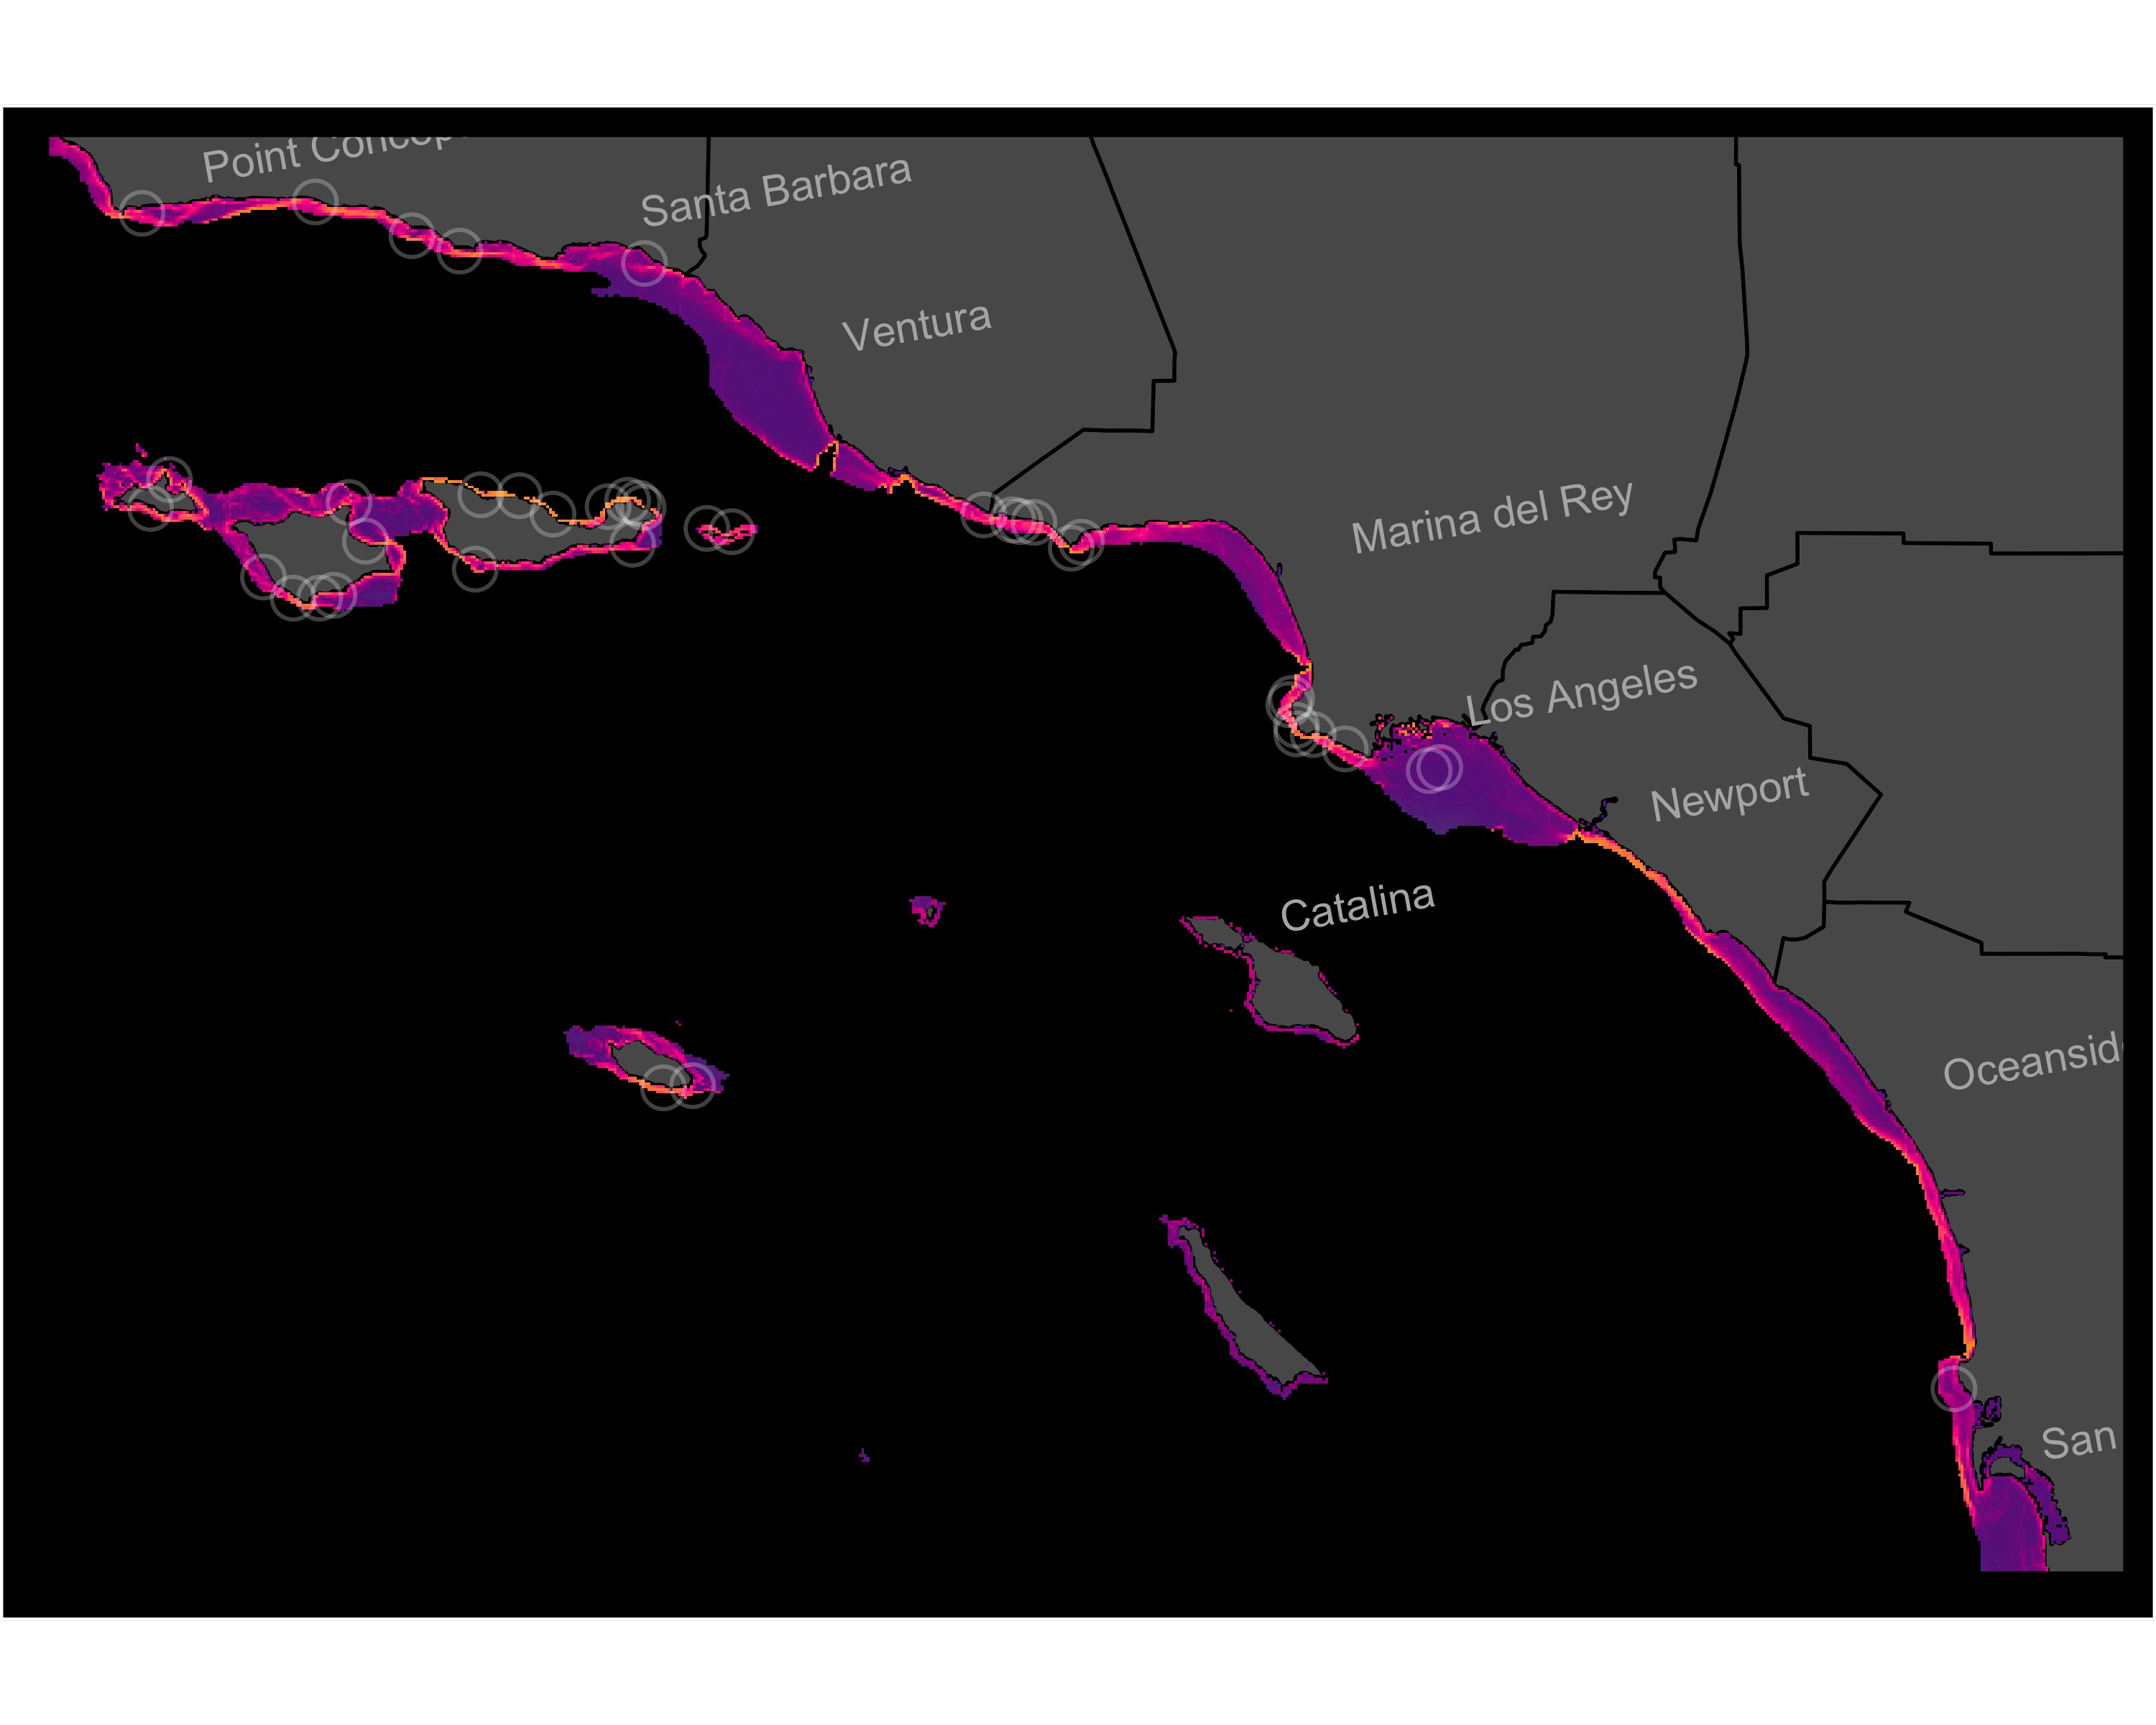


**Figure S13. Individual-SDM for *Sebastes auriculatus* in the SCB.** Model shown is the best-fit model (Table 1) of 12 candidate models. White circles show all observations from natural reefs included in the training and test datasets.


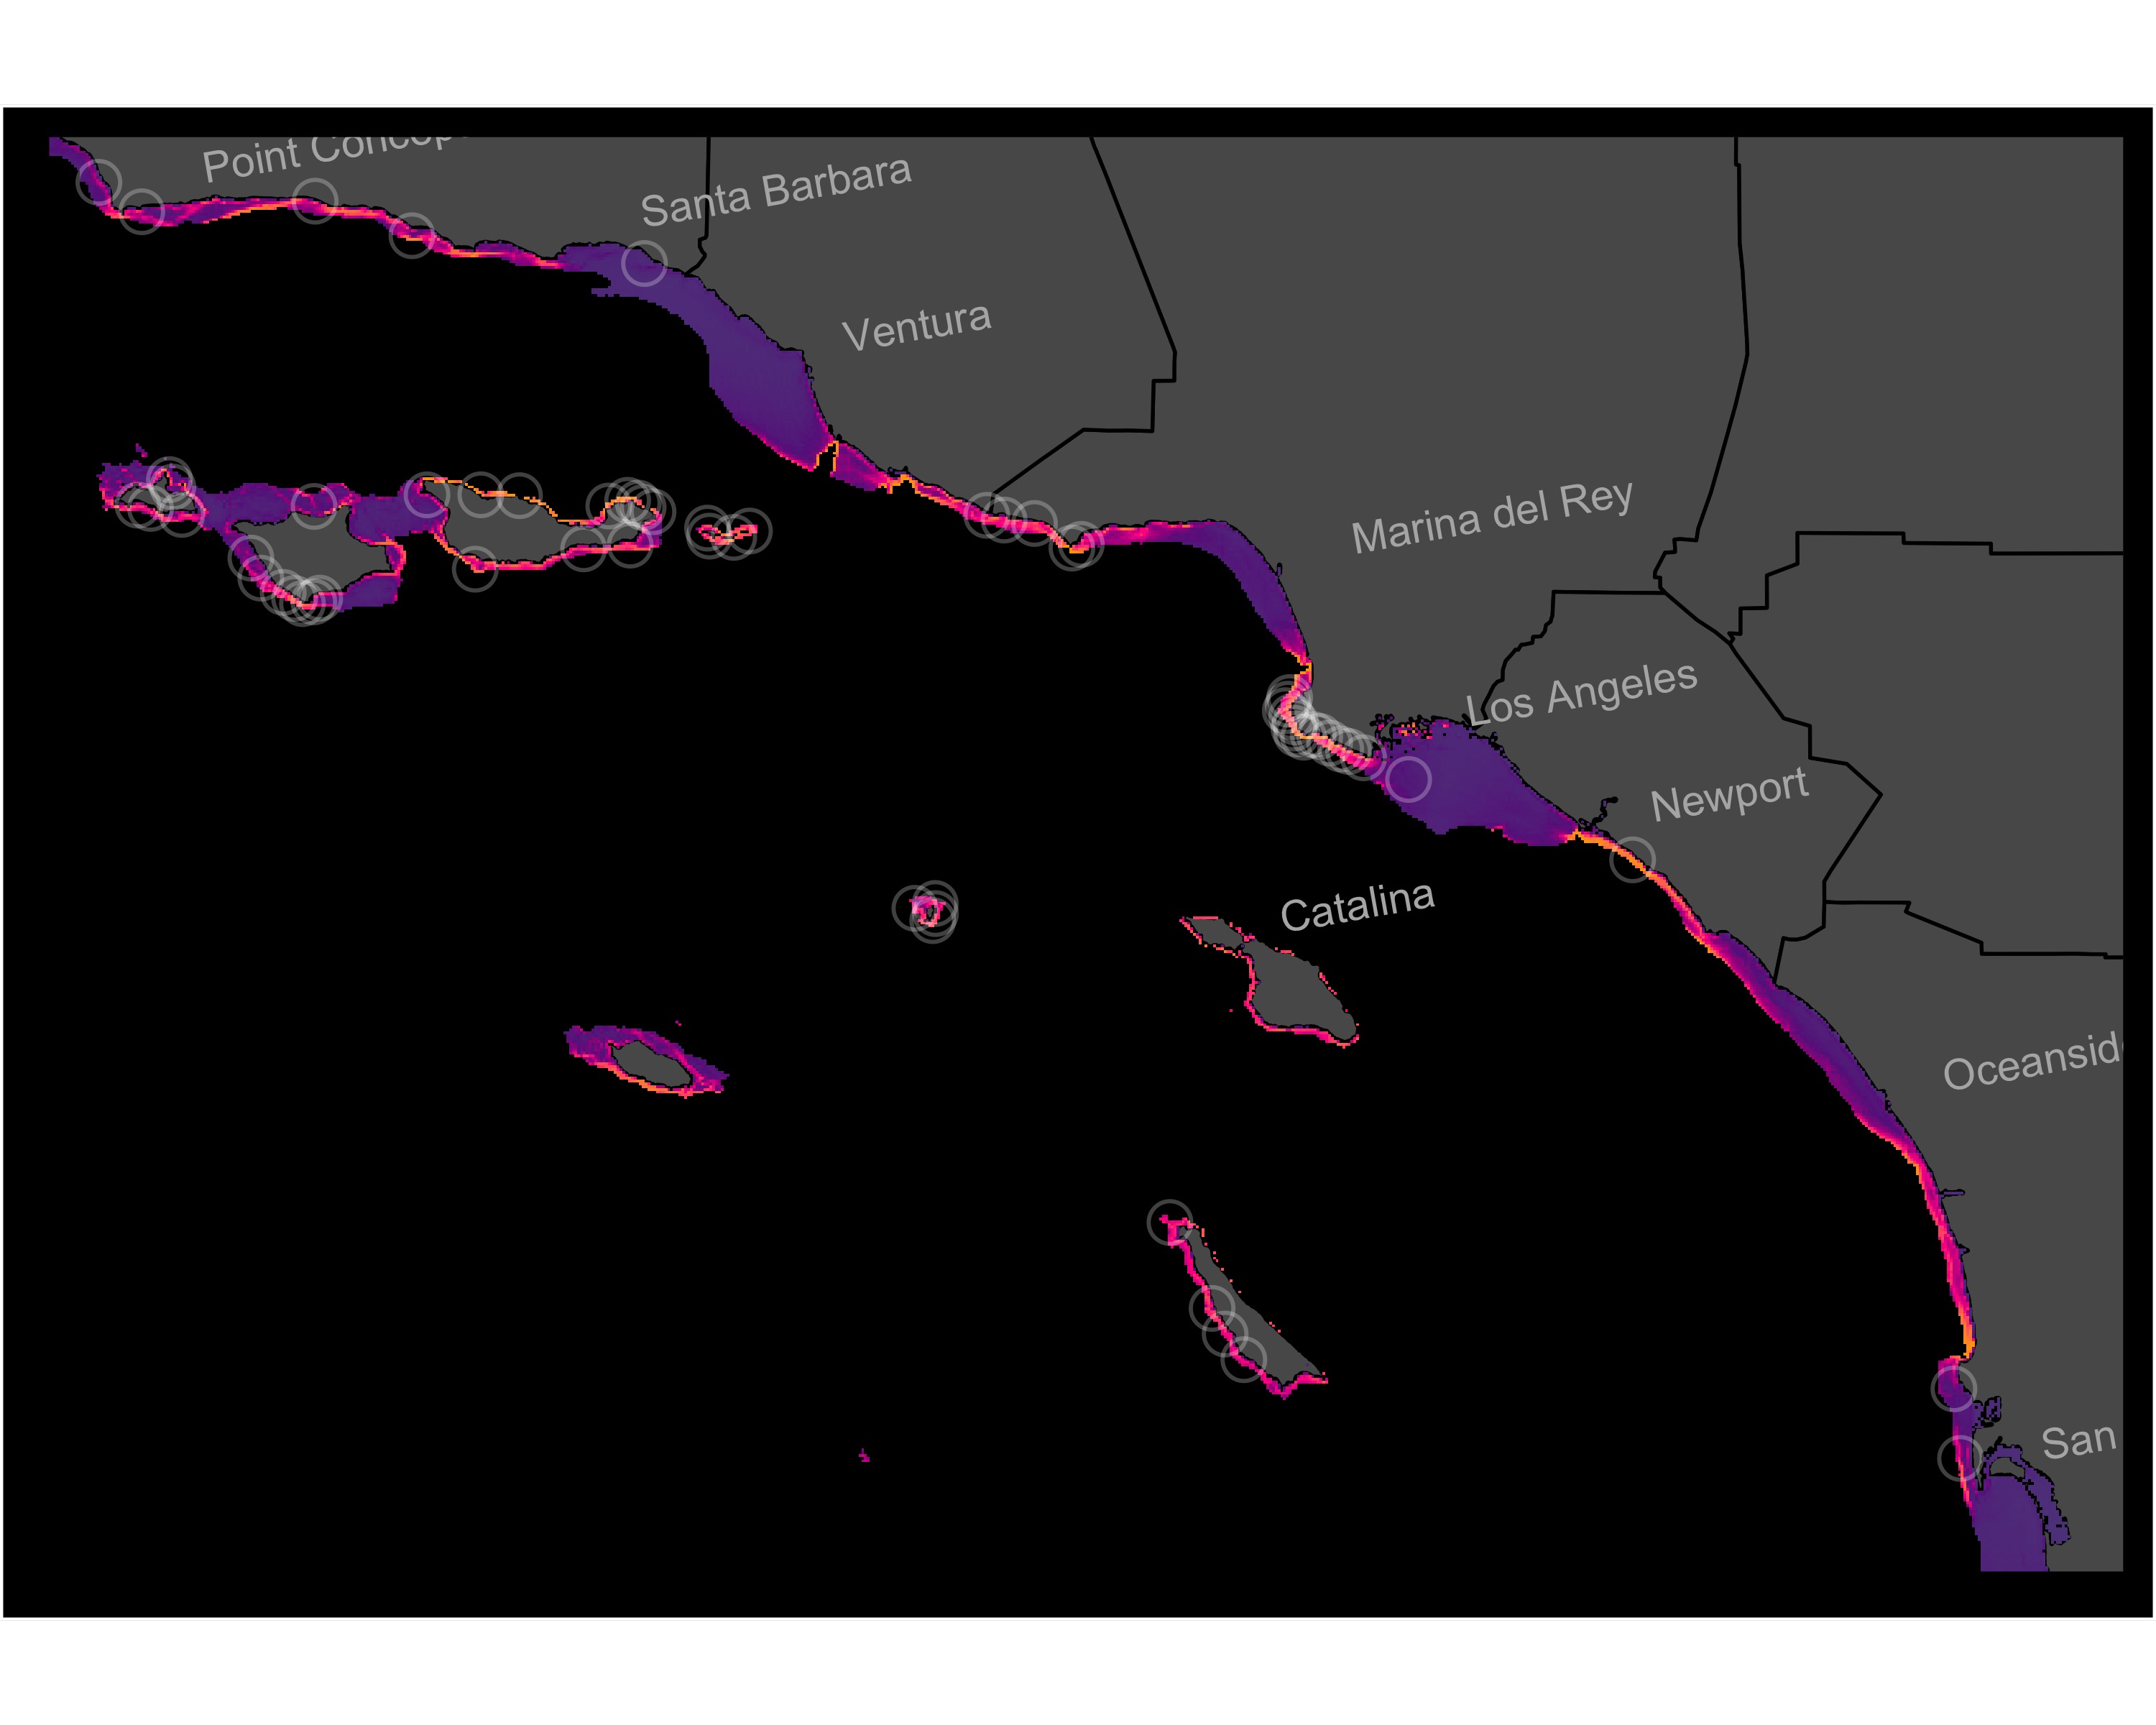


**Figure S14. Individual-SDM for *Sebastes carnatus* in the SCB.** Model shown is the best-fit model (Table 1) of 12 candidate models. White circles show all observations from natural reefs included in the training and test datasets.


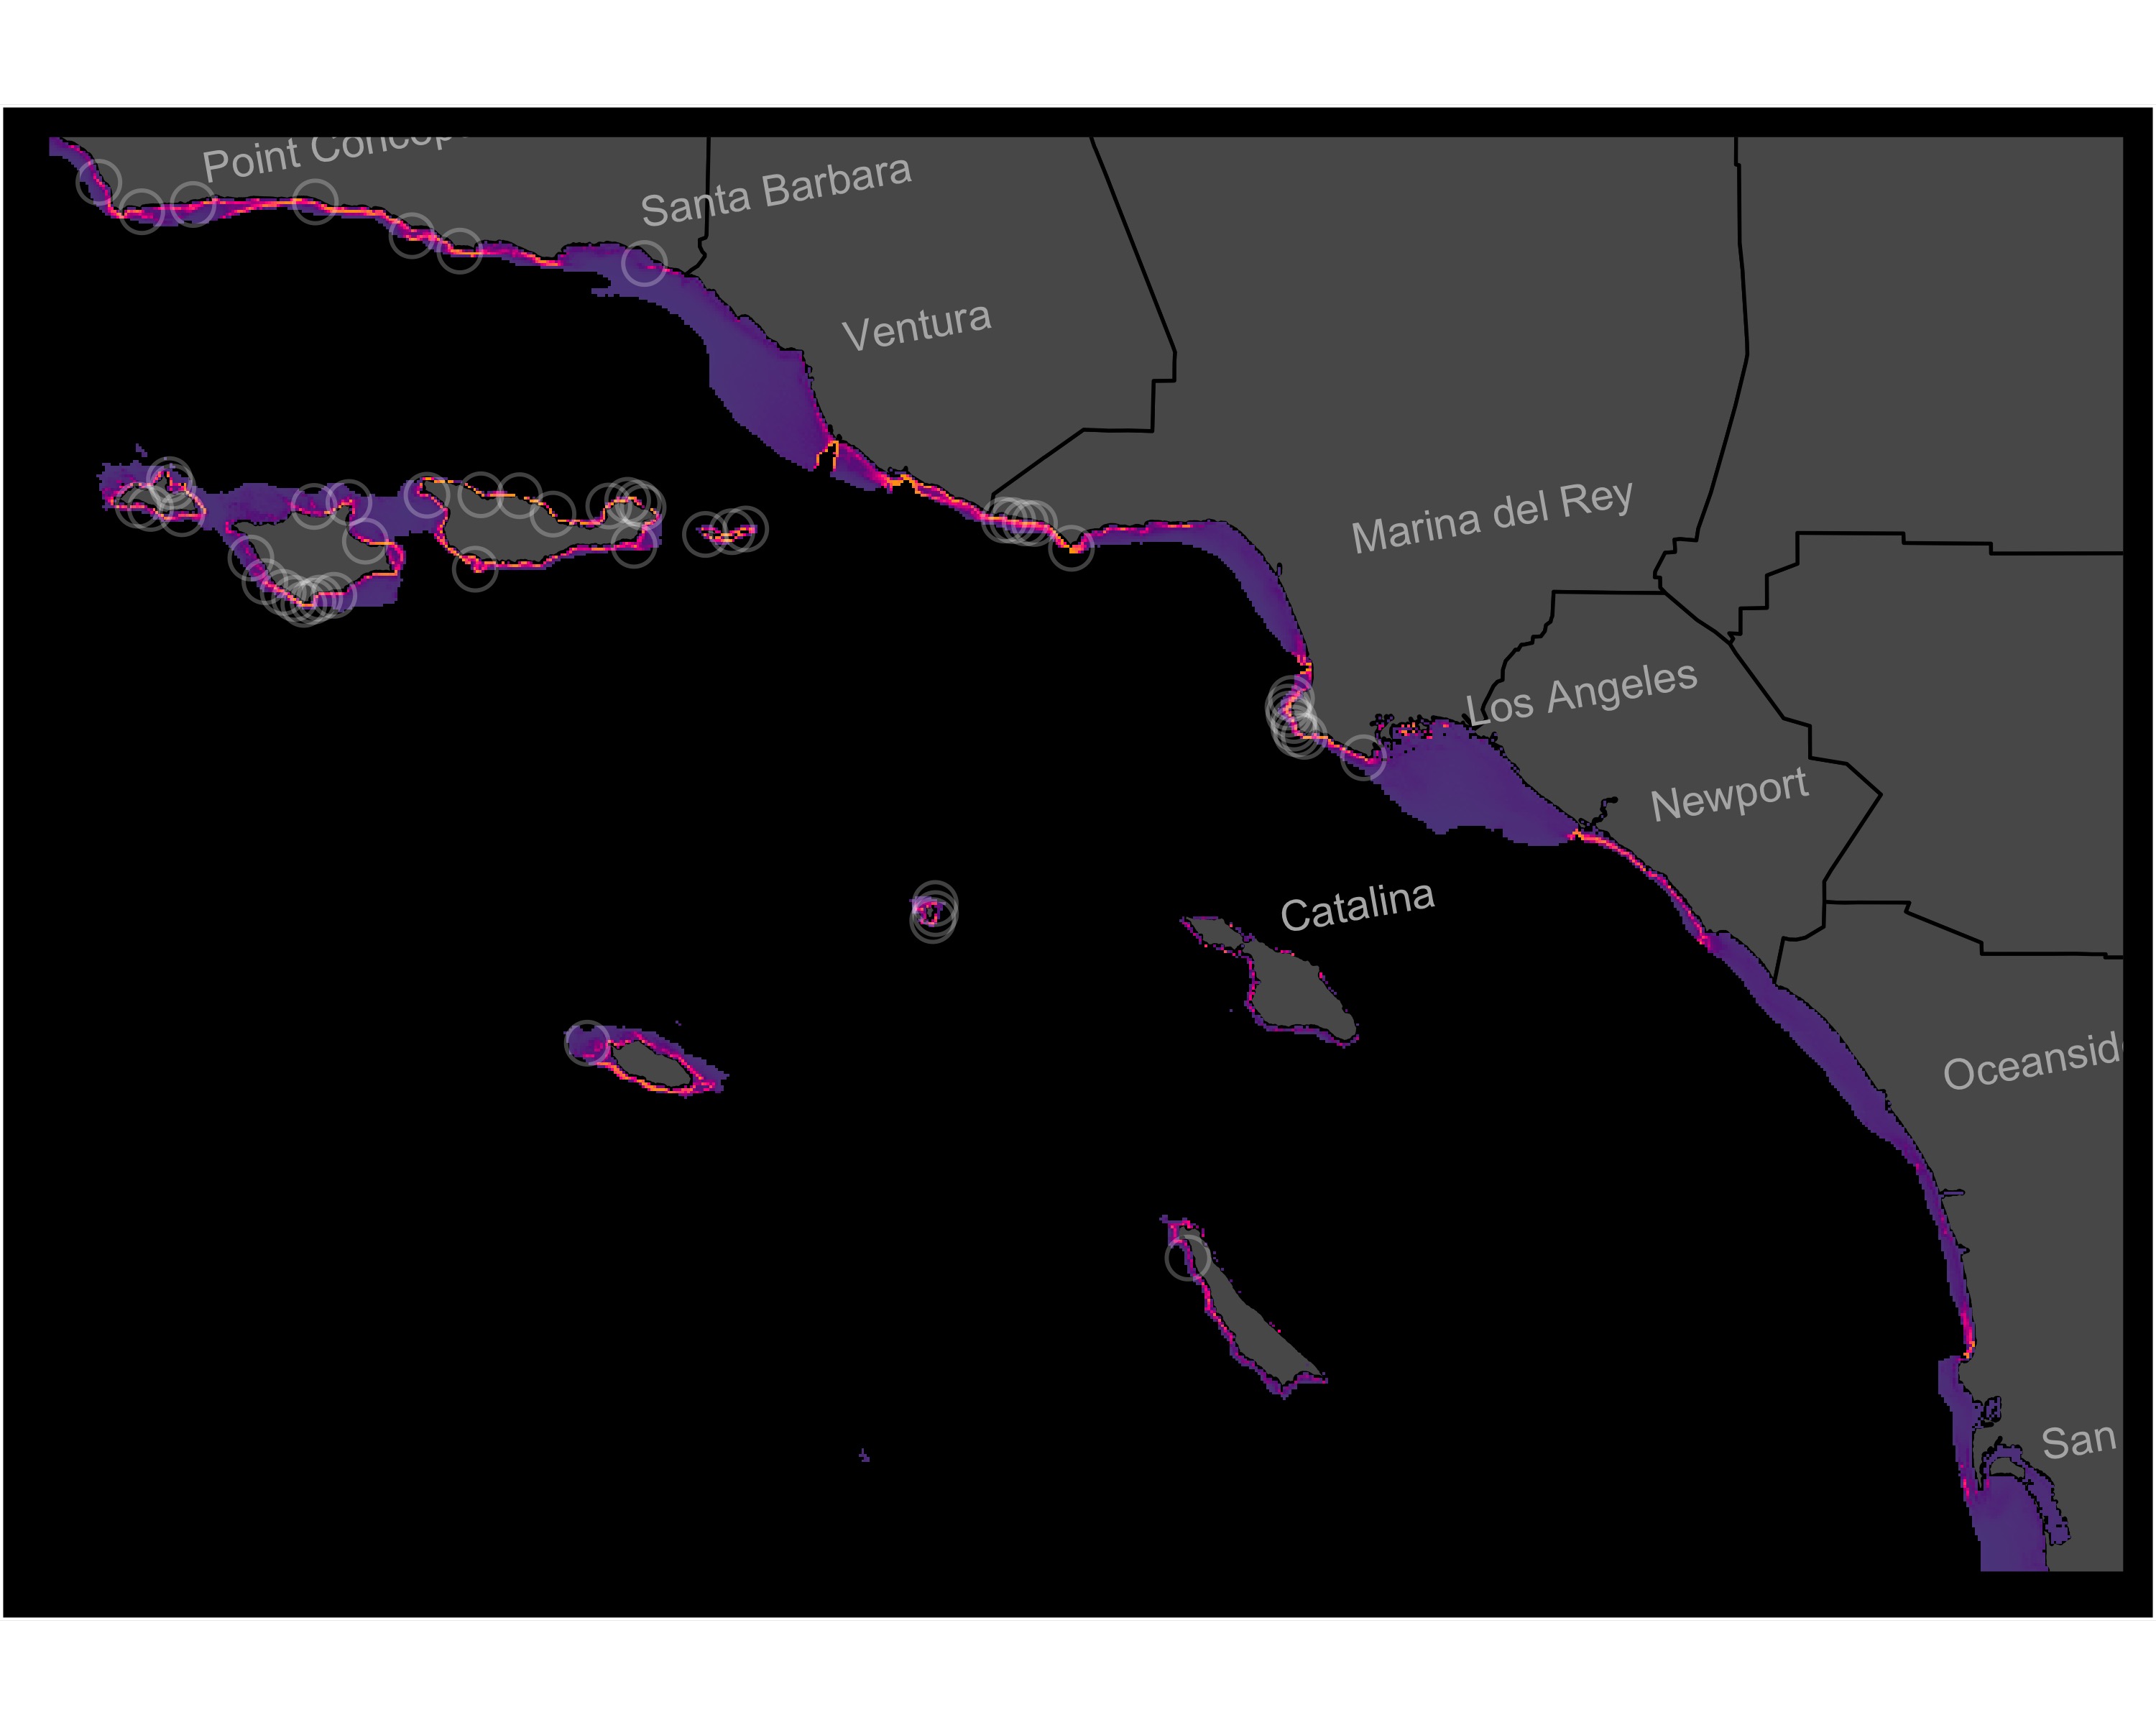


**Figure S15. Individual-SDM for *Sebastes caurinus* in the SCB.** Model shown is the best-fit model (Table 1) of 12 candidate models. White circles show all observations from natural reefs included in the training and test datasets.


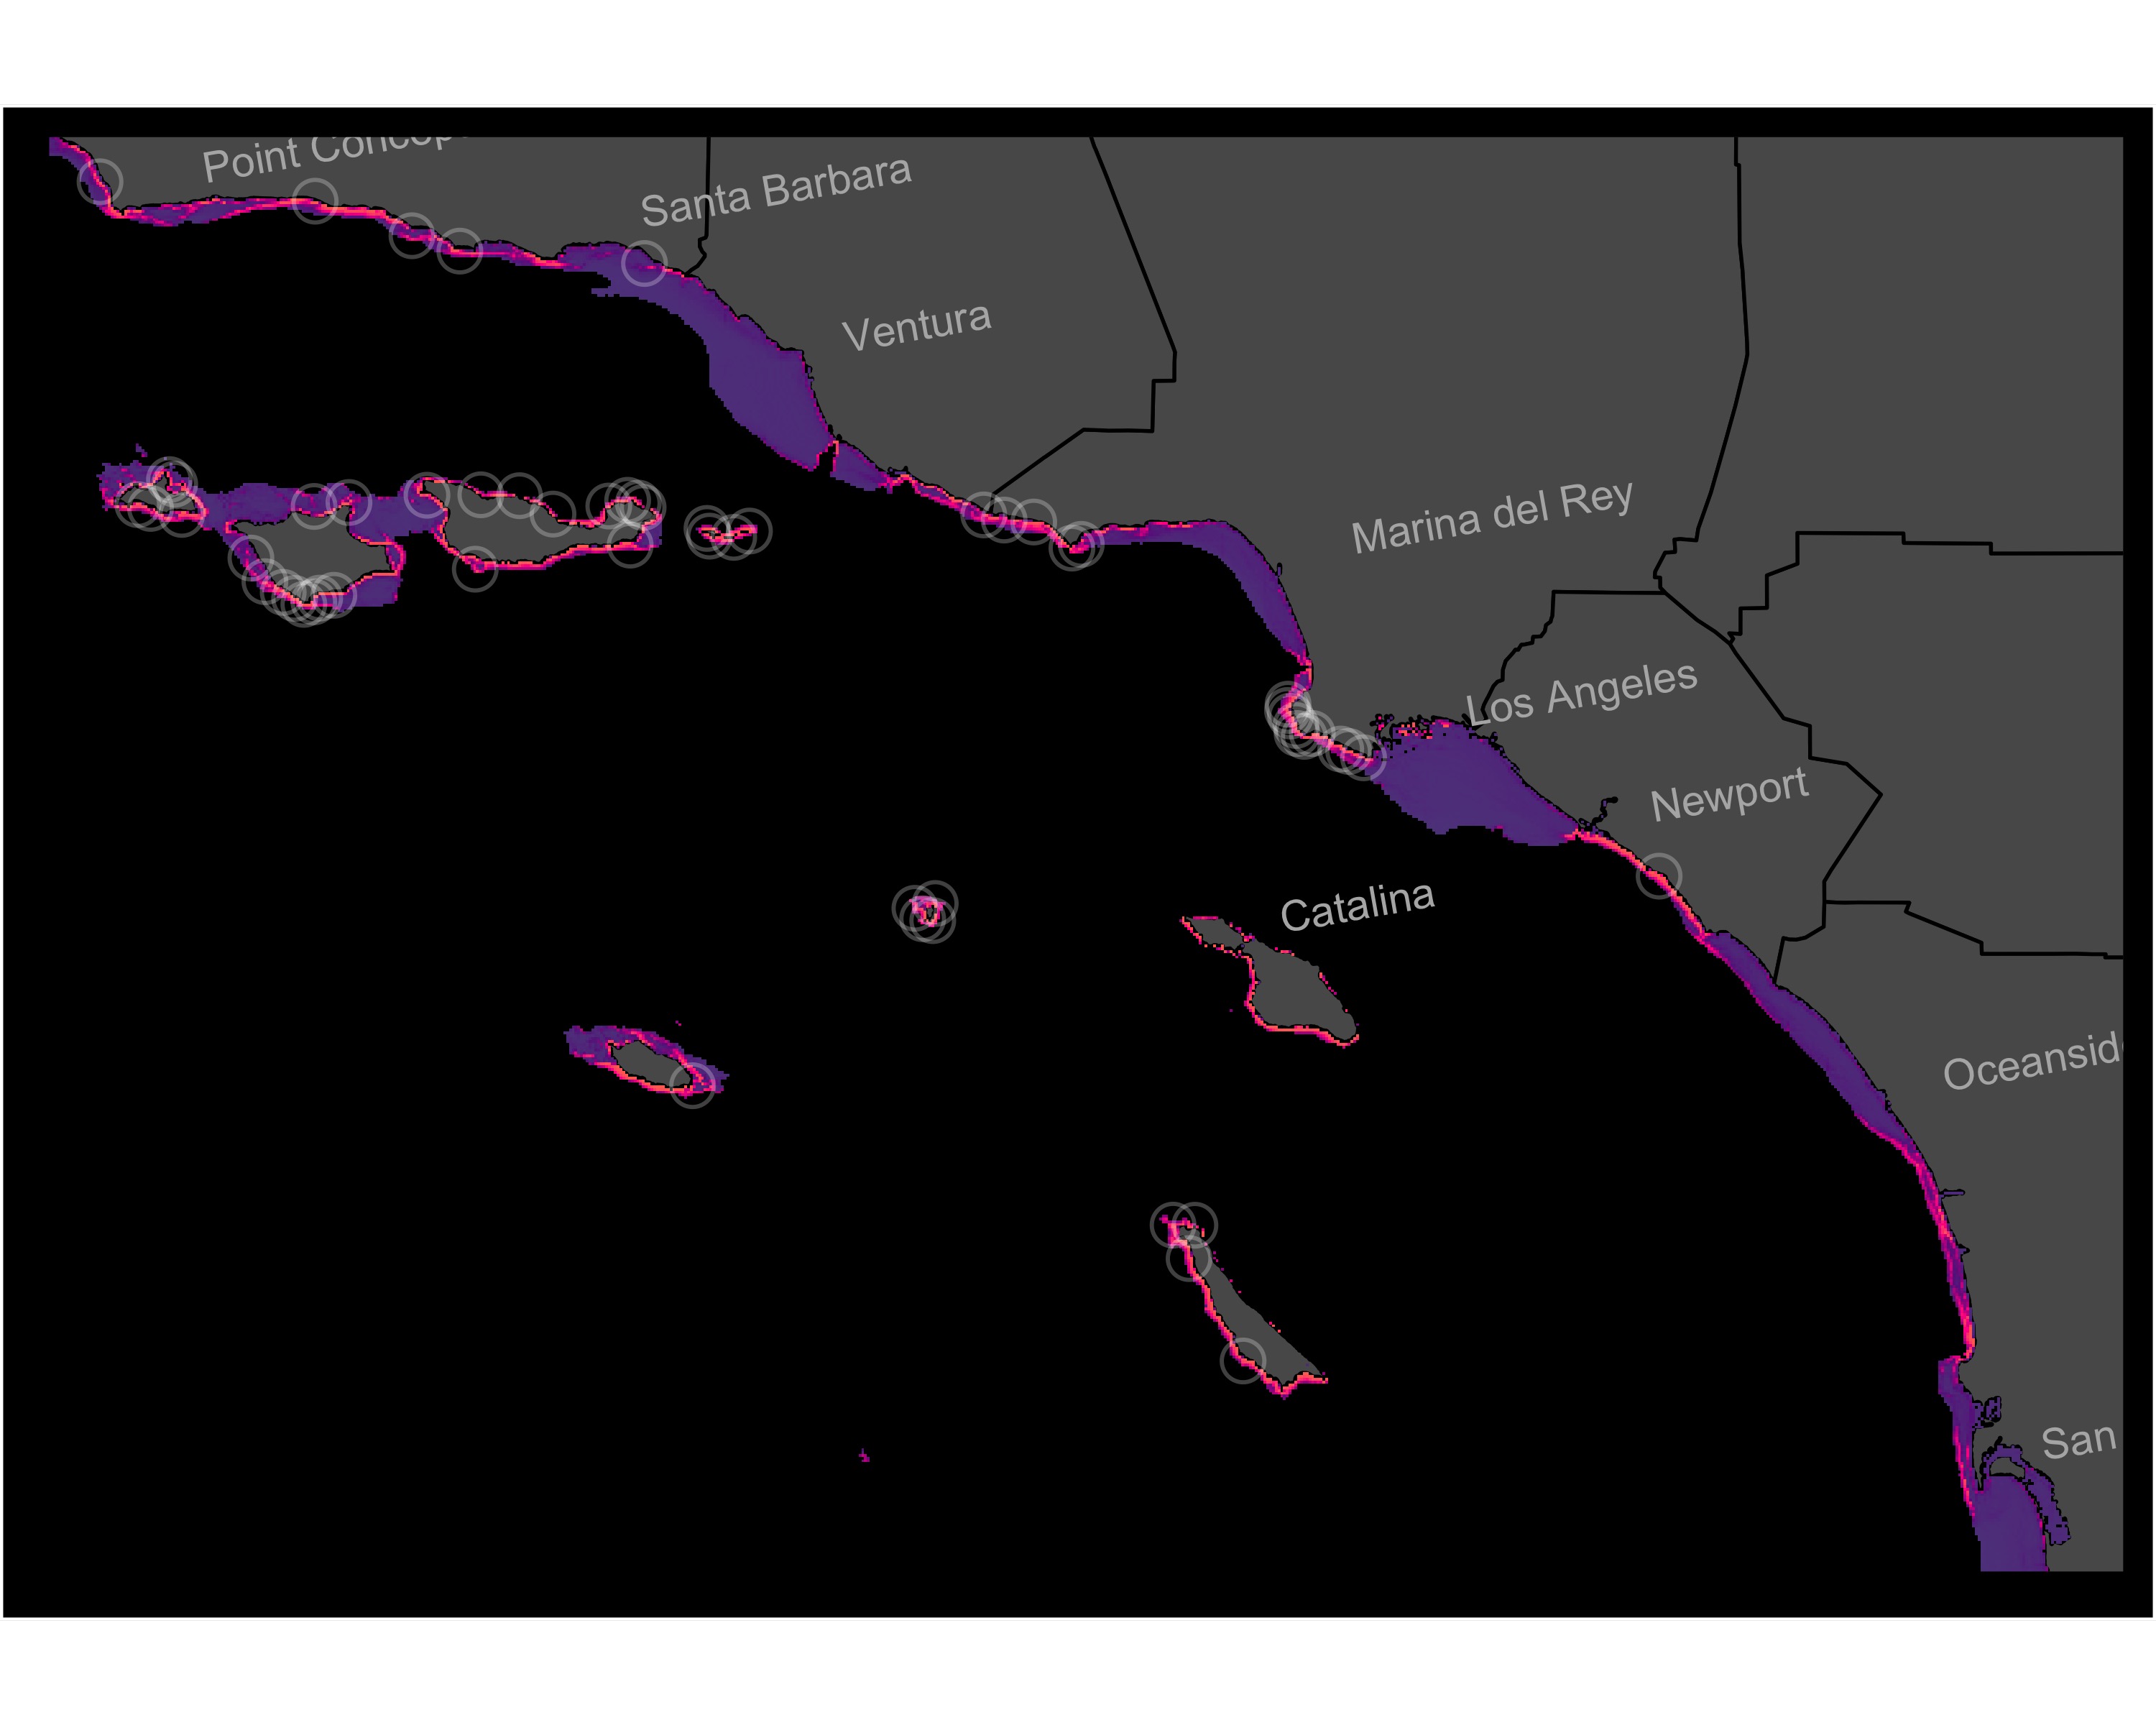


**Figure S16. Individual-SDM for *Sebastes chrysomelas* in the SCB.** Model shown is the best-fit model (Table 1) of 12 candidate models. White circles show all observations from natural reefs included in the training and test datasets.


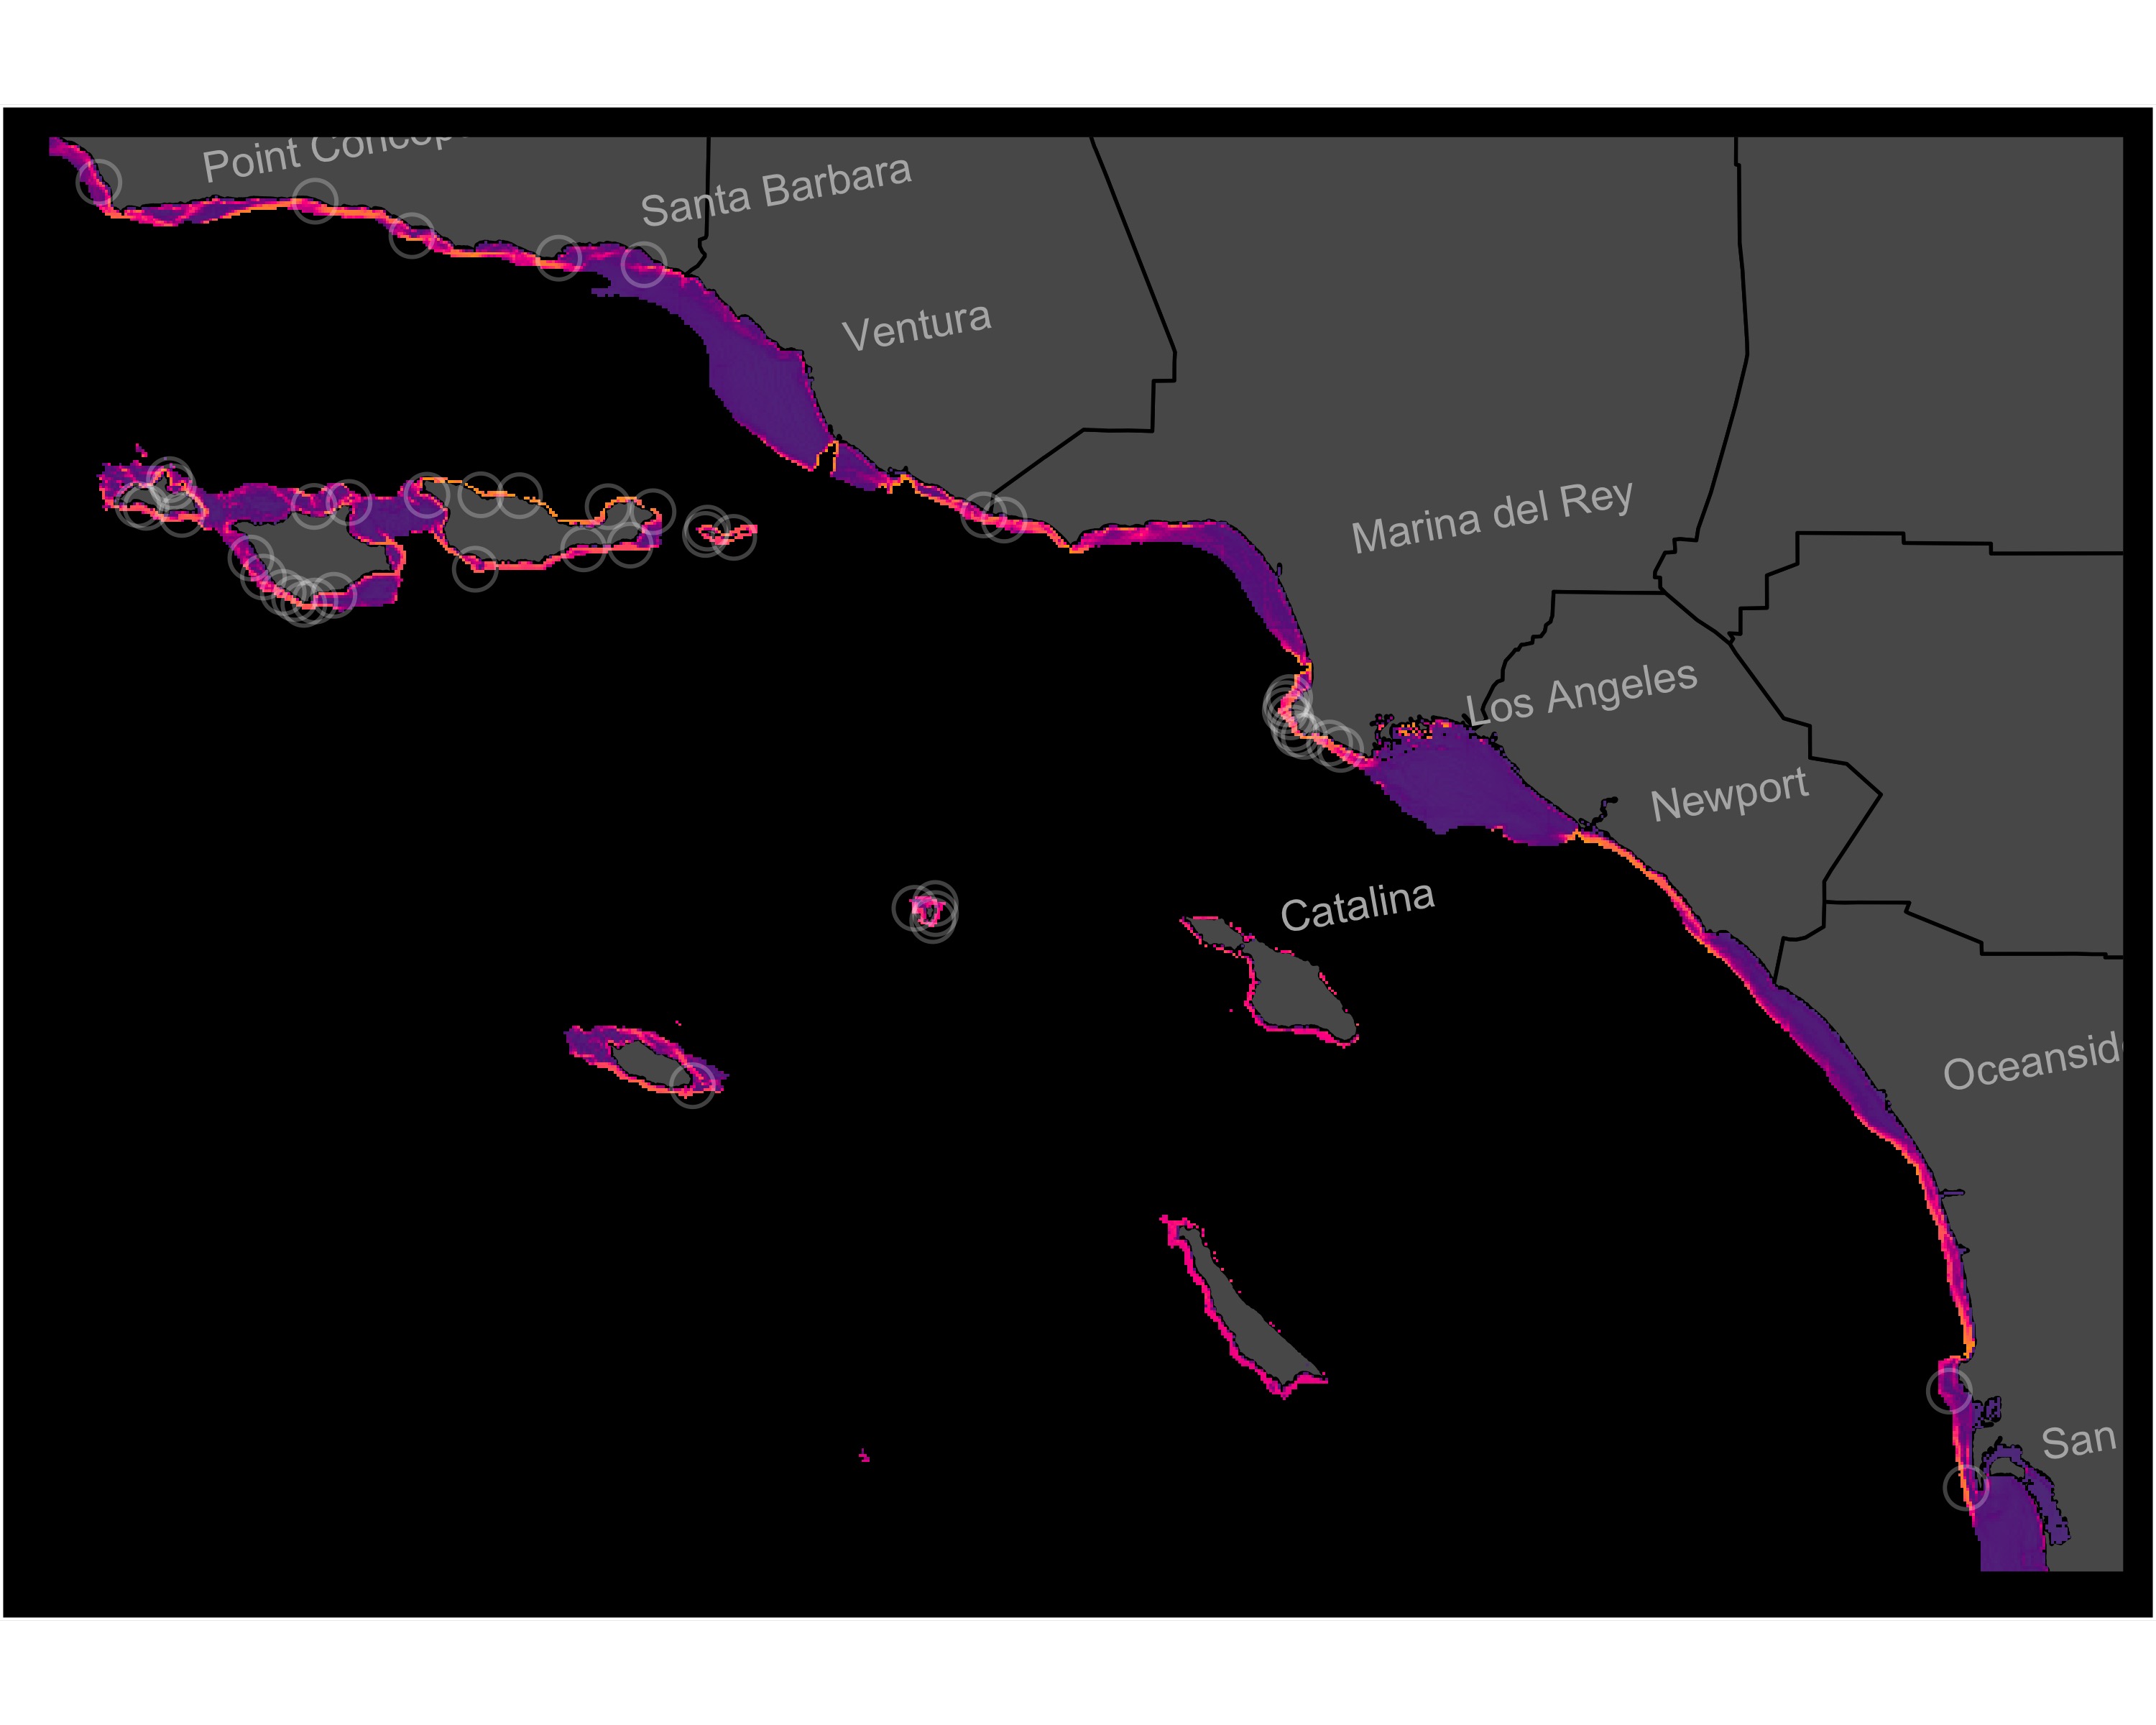


**Figure S17. Individual-SDM for *Sebastes miniatus* in the SCB.** Model shown is the best-fit model (Table 1) of 12 candidate models. White circles show all observations from natural reefs included in the training and test datasets.


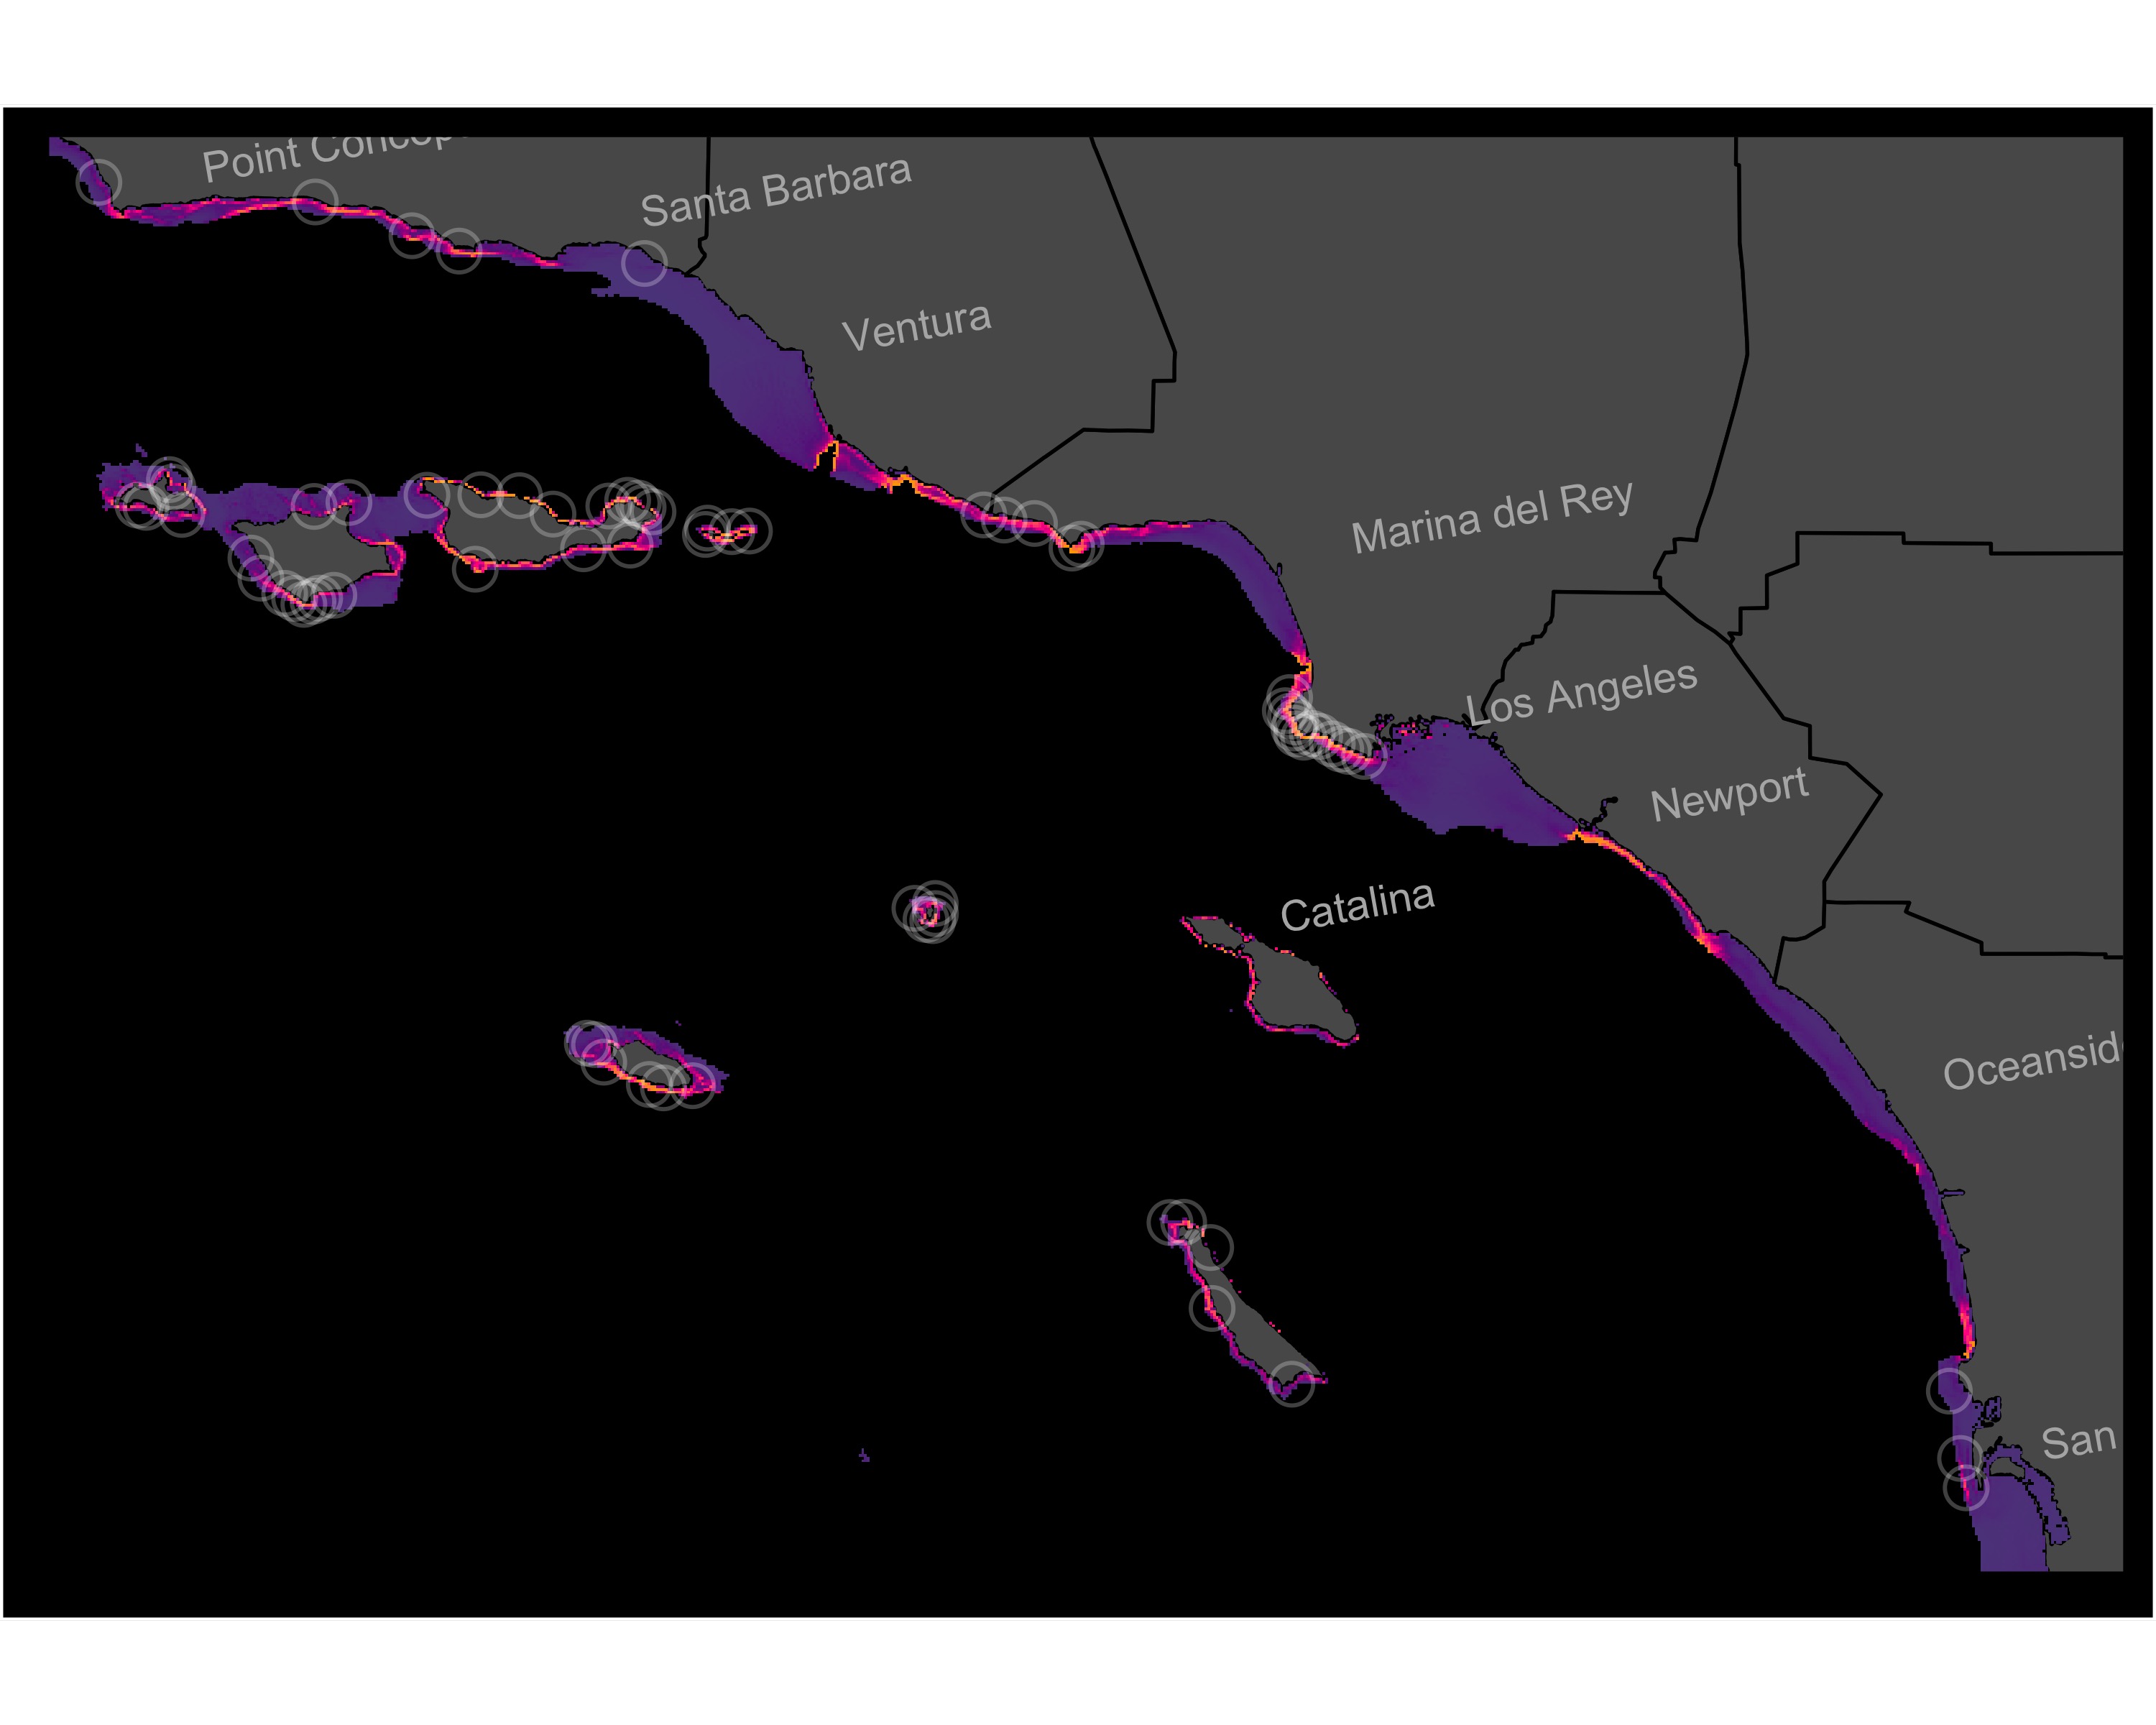


**Figure S18. Individual-SDM for *Sebastes mystinus* in the SCB.** Model shown is the best-fit model (Table 1) of 12 candidate models. White circles show all observations from natural reefs included in the training and test datasets.


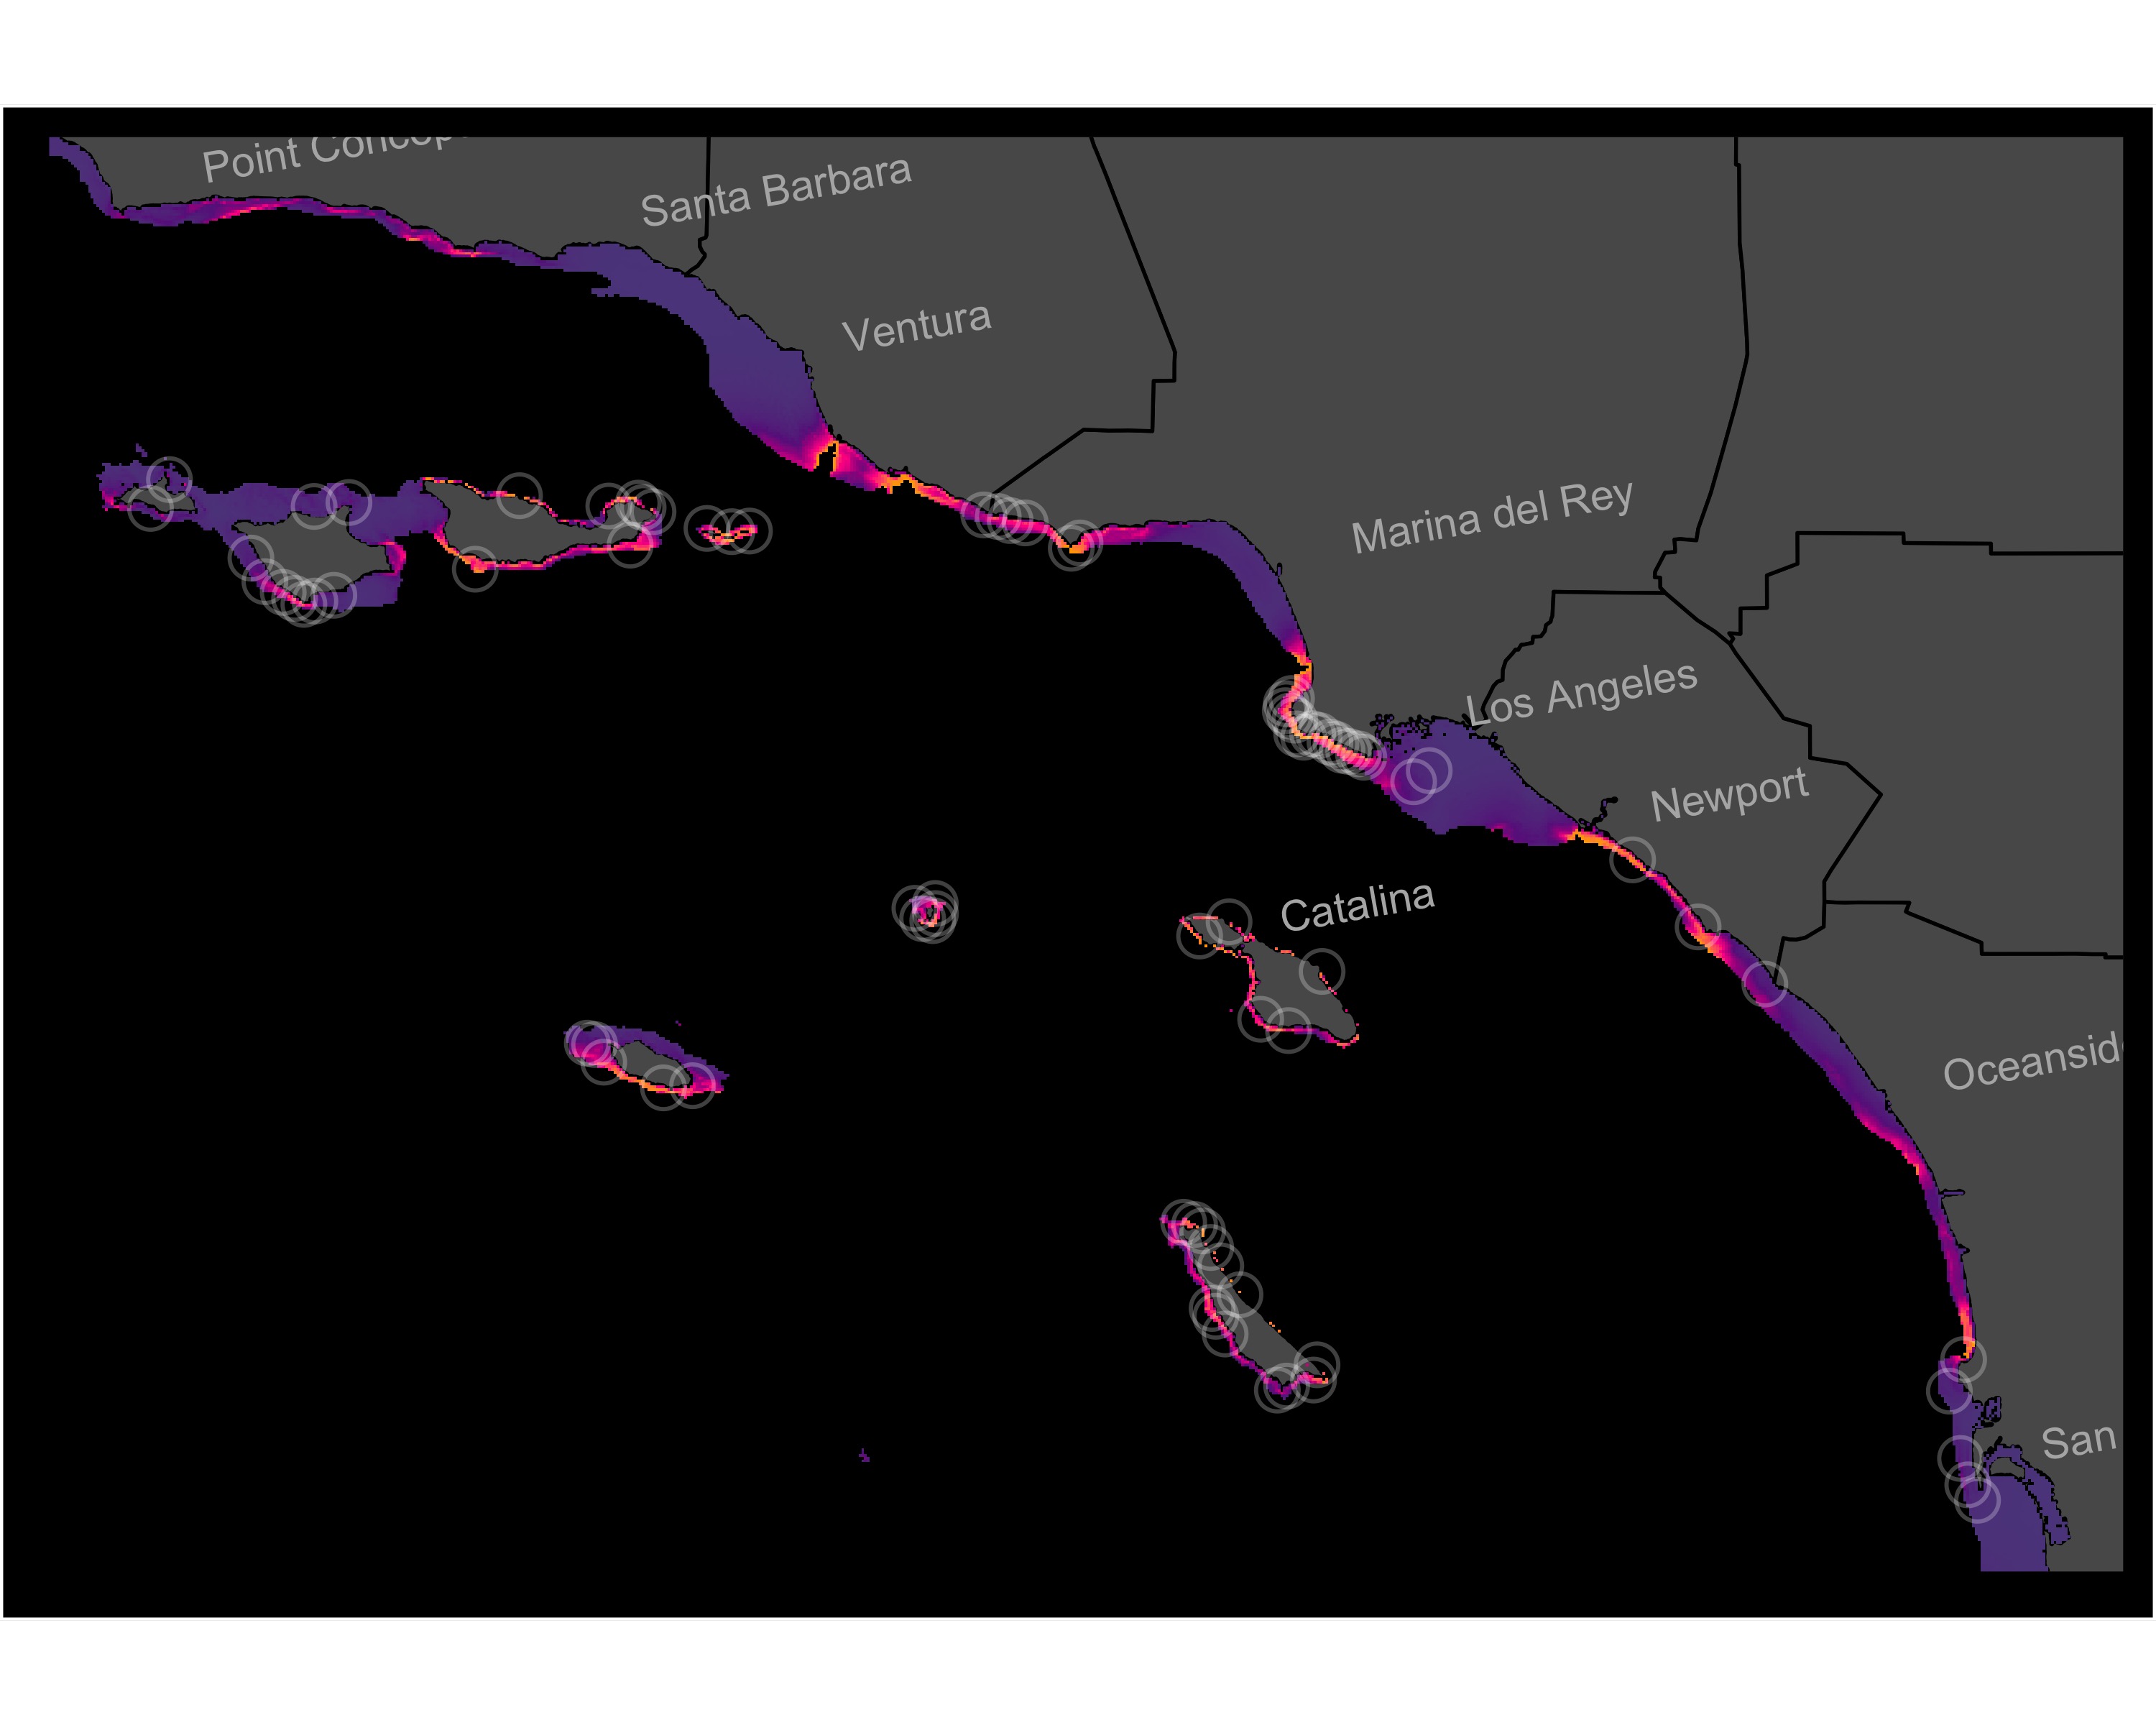


**Figure S19. Individual-SDM for *Sebastes serranoides* in the SCB.** Model shown is the best-fit model (Table 1) of 12 candidate models. White circles show all observations from natural reefs included in the training and test datasets.


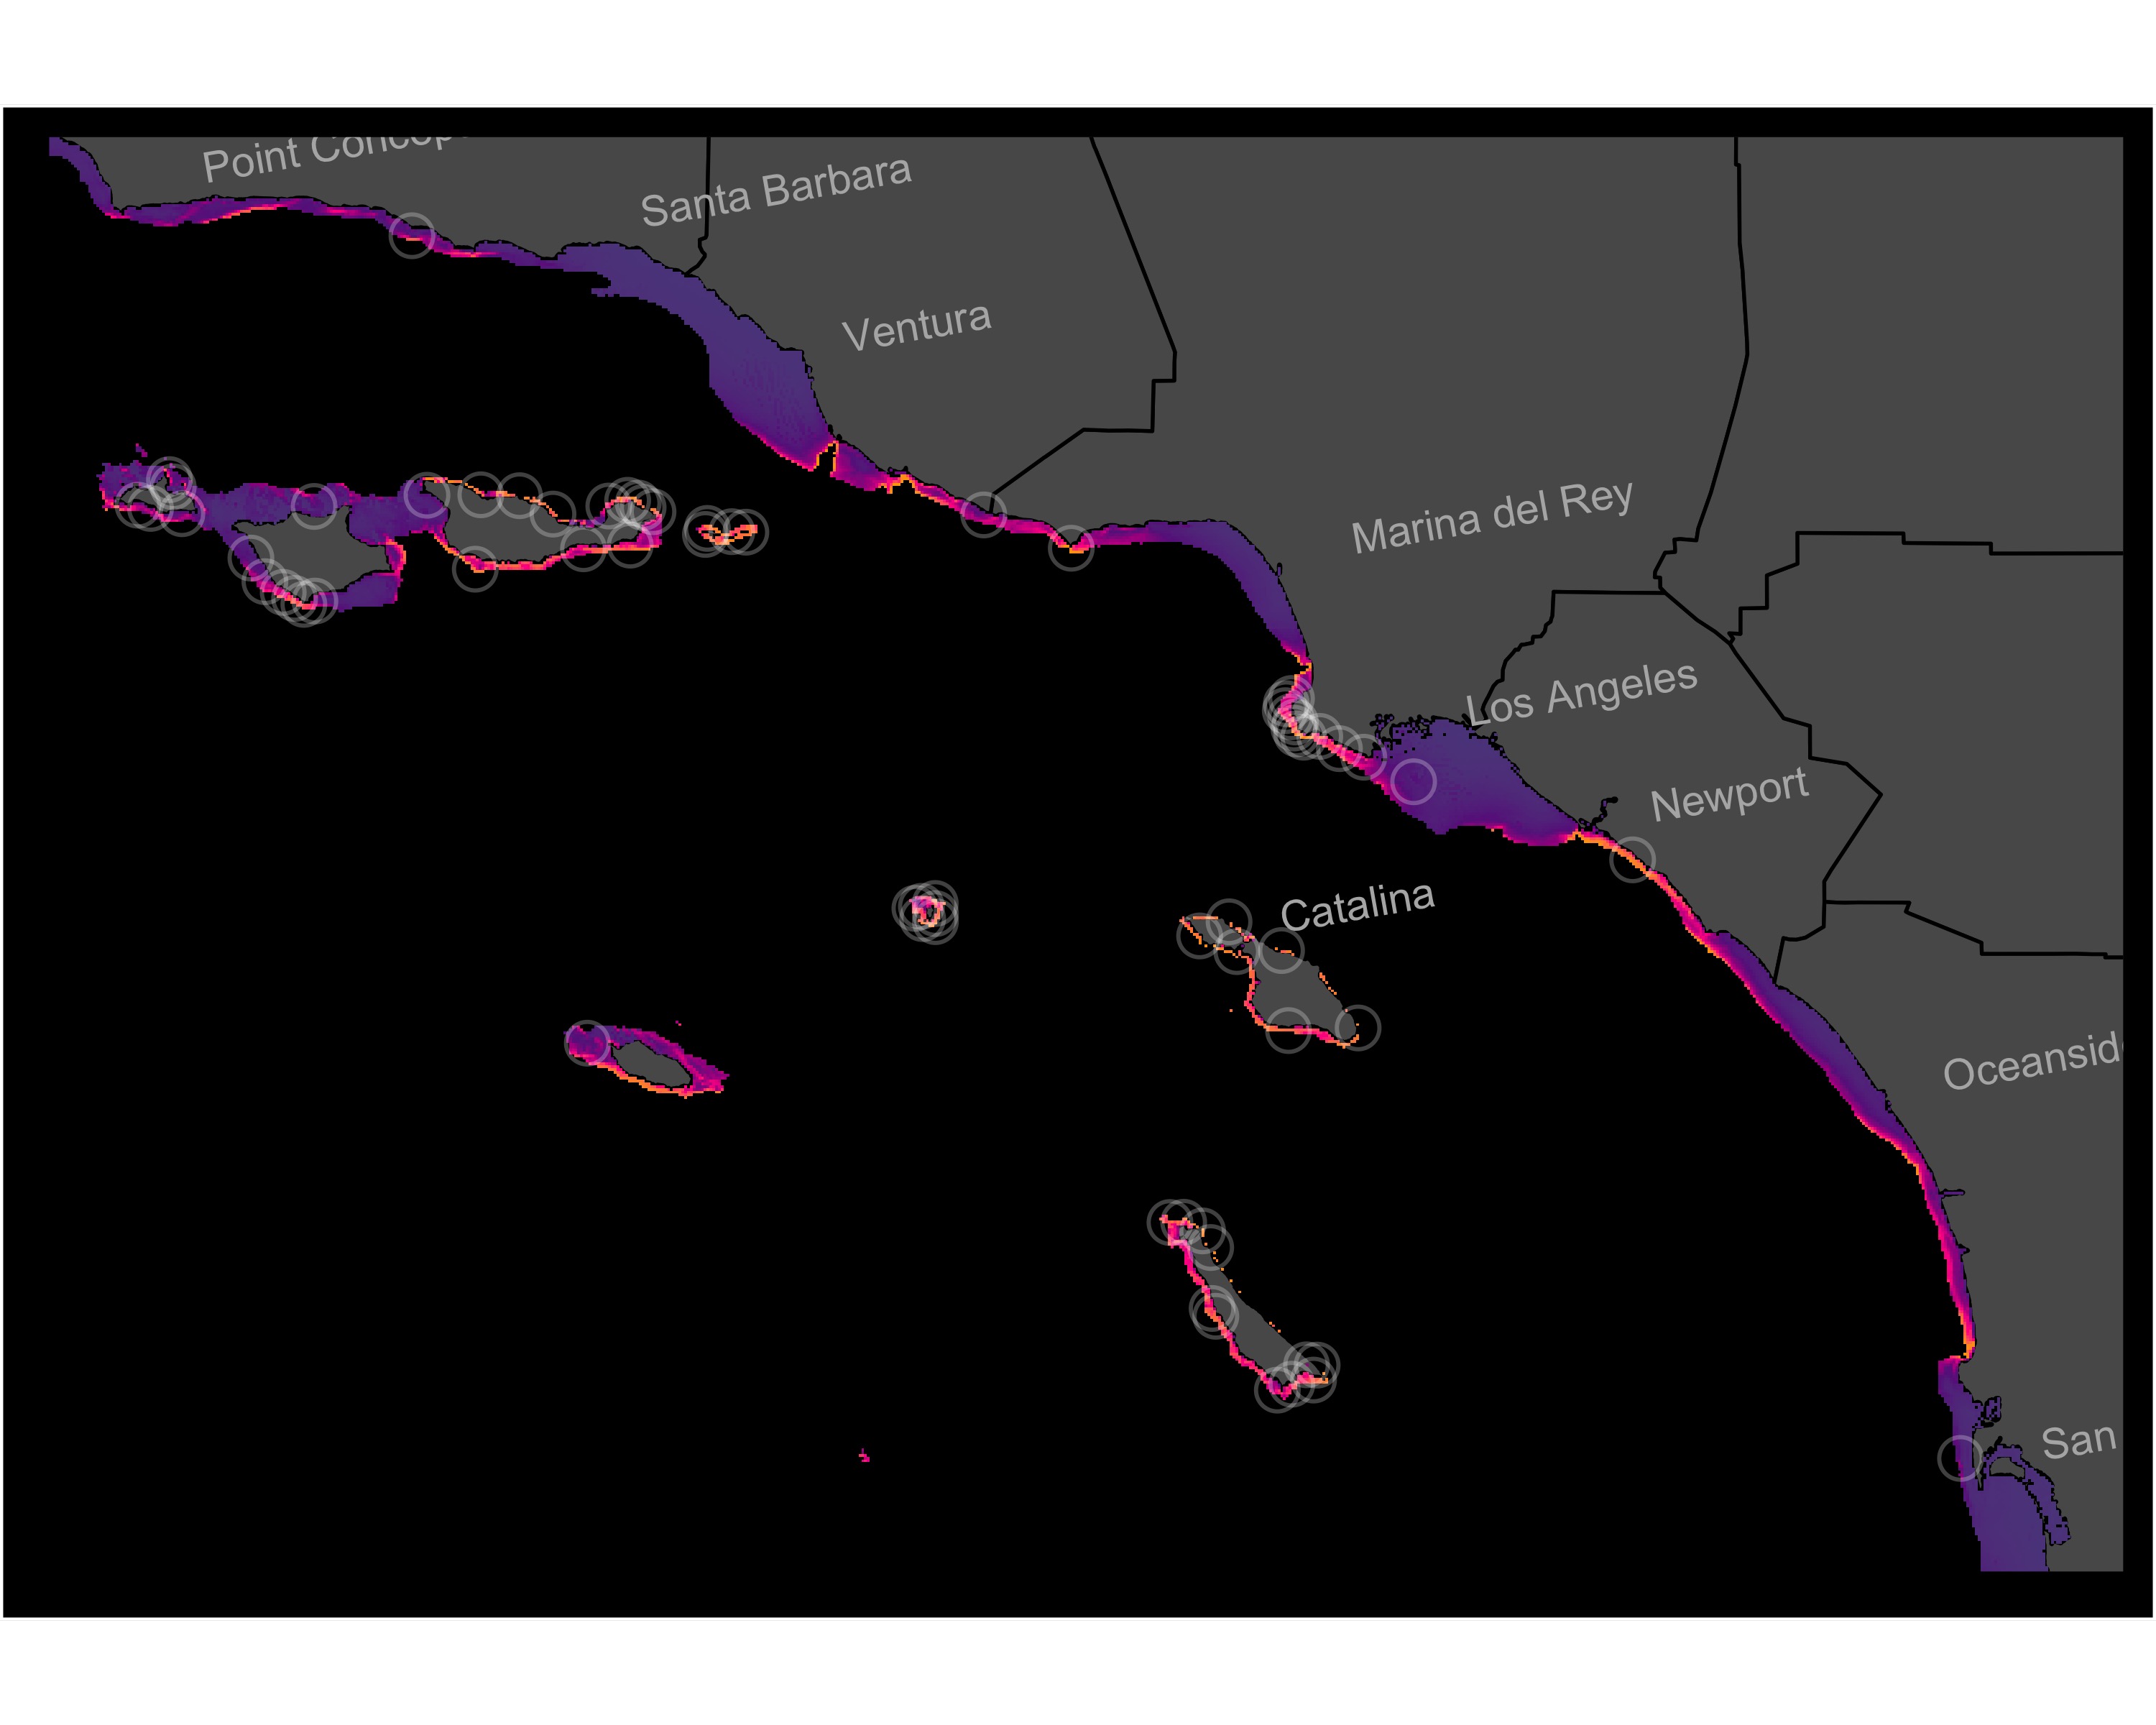


**Figure S20. Individual-SDM for *Sebastes serriceps* in the SCB.** Model shown is the best-fit model (Table 1) of 12 candidate models. White circles show all observations from natural reefs included in the training and test datasets.


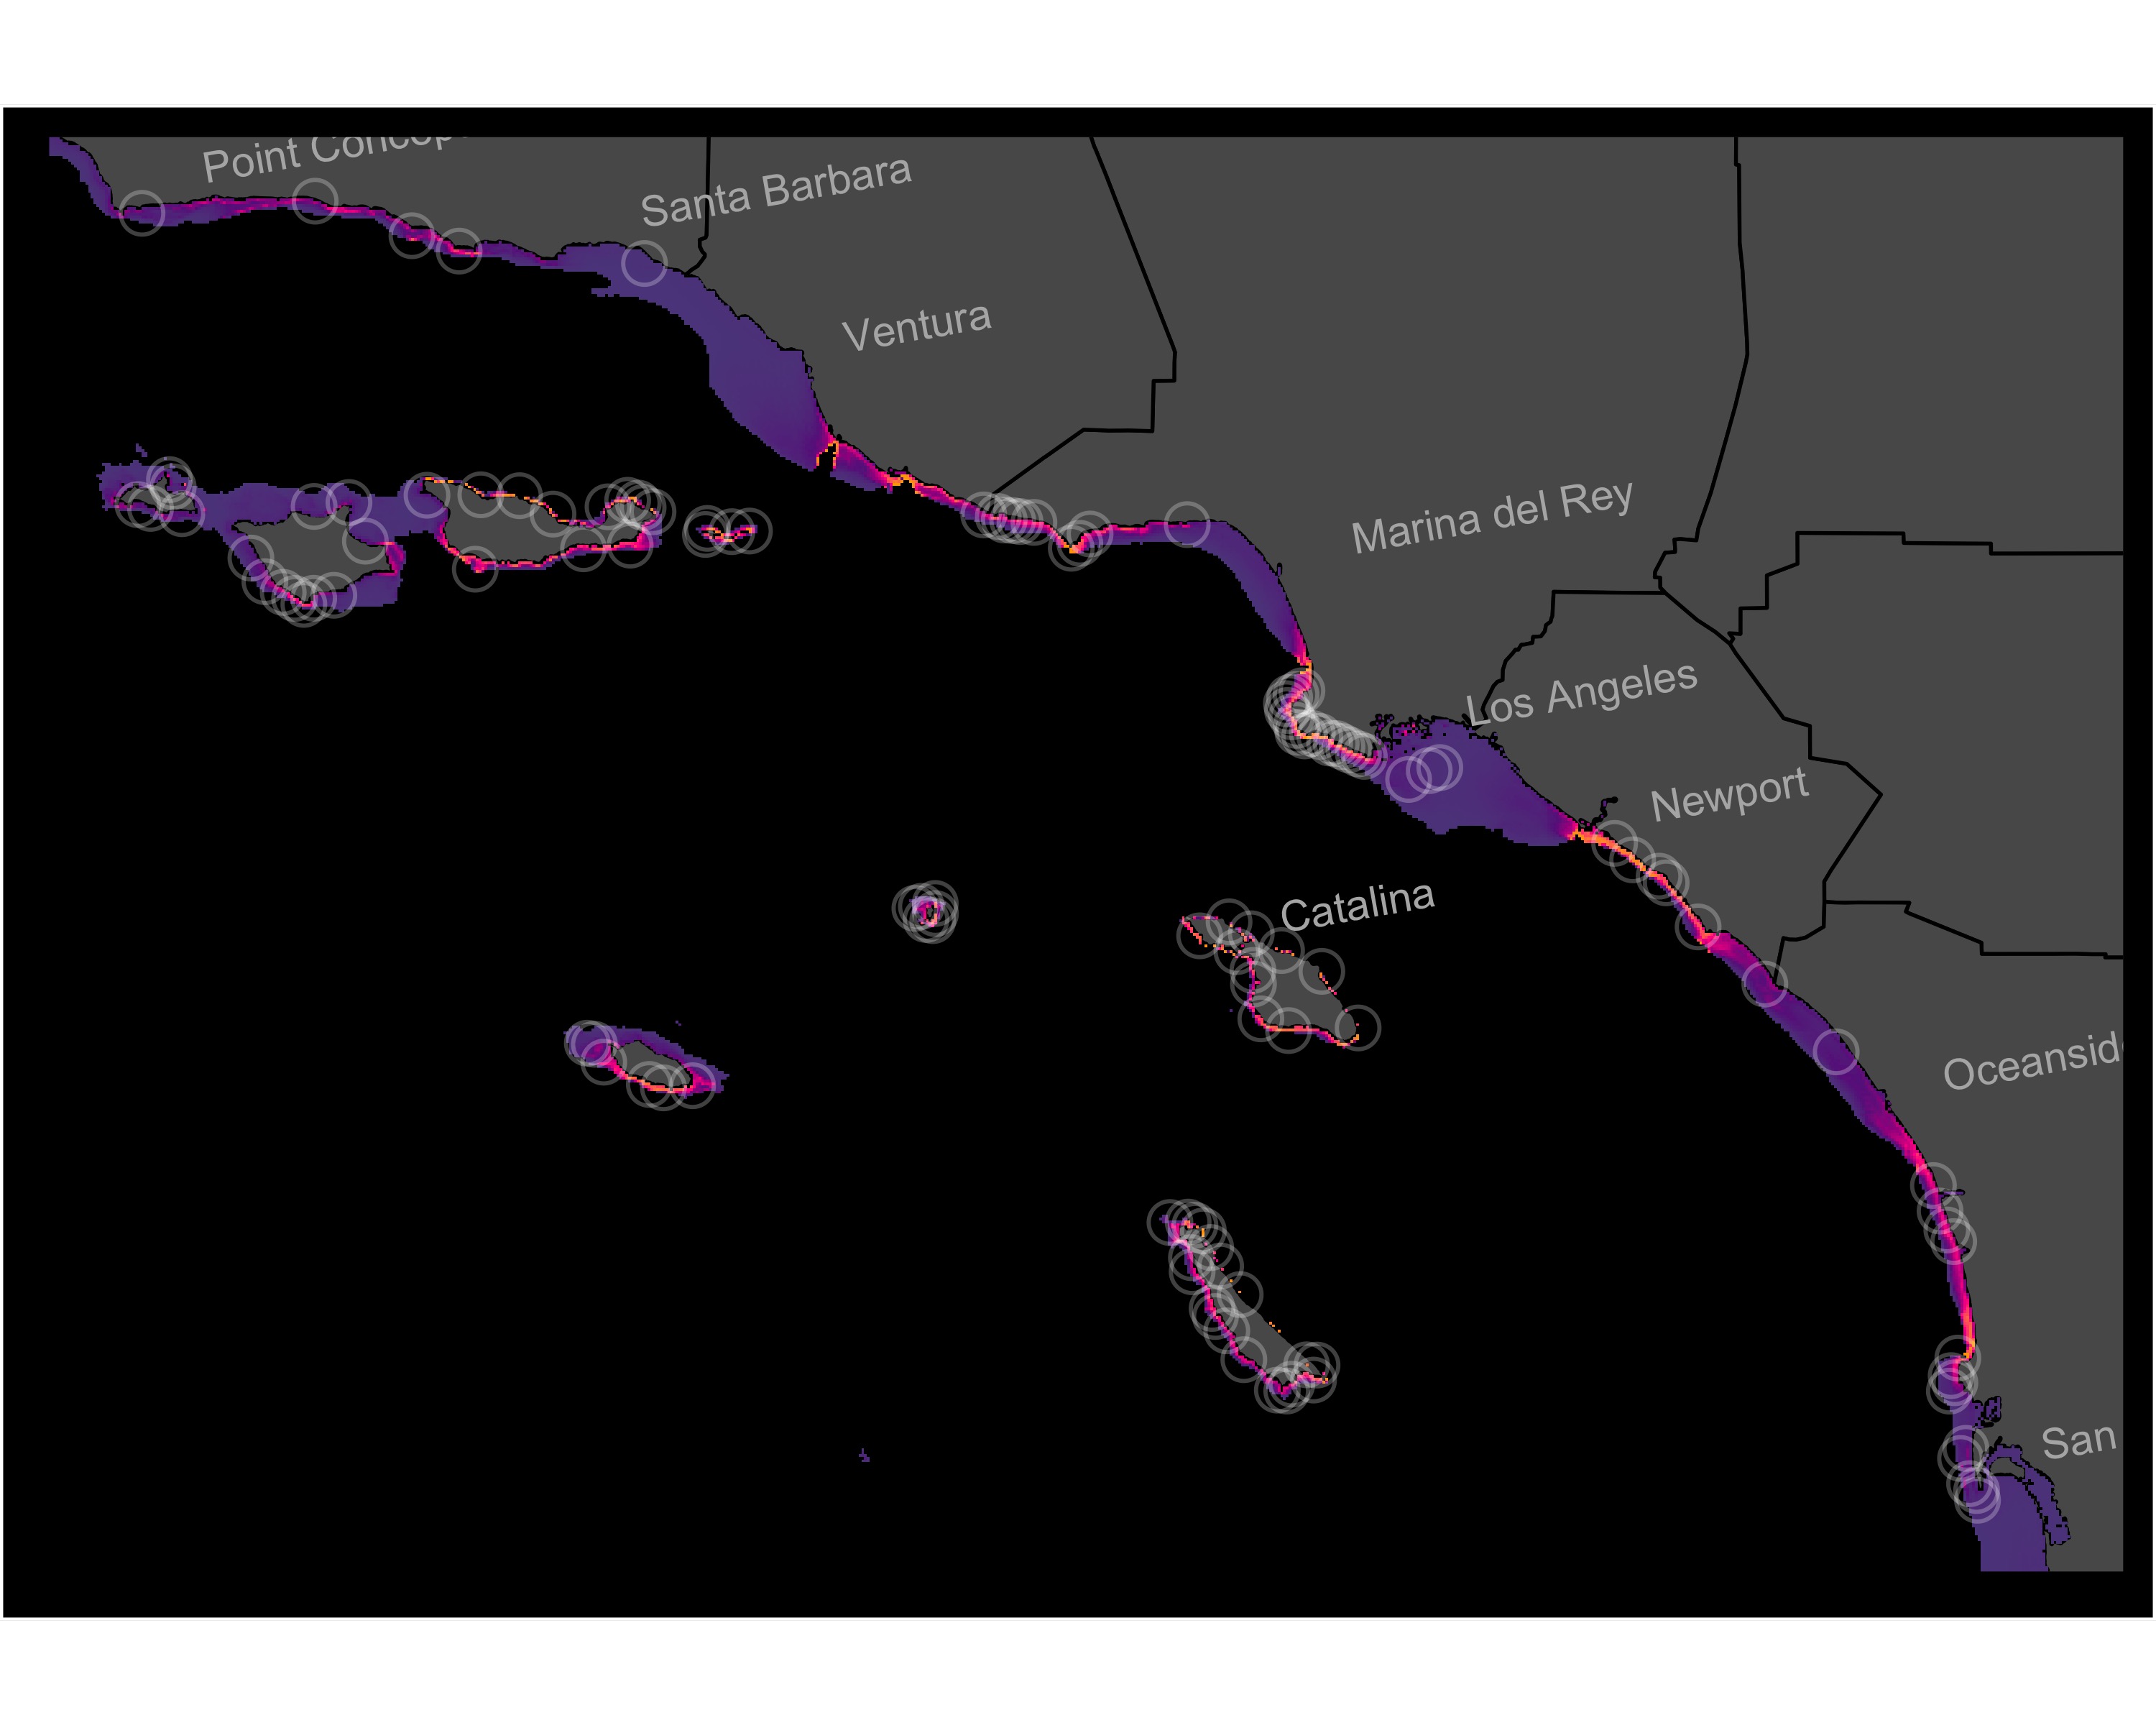


**Figure S21. Individual-SDM for *Semicossyphus pulcher* in the SCB.** Model shown is the best-fit model (Table 1) of 12 candidate models. White circles show all observations from natural reefs included in the training and test datasets.
